# Supplementary material for: PCASTt/SPCG-17—a randomised trial of active surveillance in prostate cancer: rationale and design
Source: PubMed Central journal article supplement — BMJ Open. 2019 Aug 22;9(8):e027860. doi: 10.1136/bmjopen-2018-027860 (PMC6707666; doi:10.1136/bmjopen-2018-027860), 2019-08-22
Supplement: bmjopen-2018-027860.draft_revisions.pdf [file bmjopen-2018-027860.draft_revisions.pdf]

# BMJ Open

BMJ Open is committed to open peer review. As part of this commitment we make the peer review history of every article we publish publicly available.

When an article is published we post the peer reviewers' comments and the authors' responses online. We also post the versions of the paper that were used during peer review. These are the versions that the peer review comments apply to.

The versions of the paper that follow are the versions that were submitted during the peer review process. They are not the versions of record or the final published versions. They should not be cited or distributed as the published version of this manuscript.

BMJ Open is an open access journal and the full, final, typeset and author-corrected version of record of the manuscript is available on our site with no access controls, subscription charges or pay-per-view fees (<http://bmjopen.bmj.com>).

If you have any questions on BMJ Open's open peer review process please email [info.bmjopen@bmj.com](mailto:info.bmjopen@bmj.com)

# BMJ Open

## PCASTt/SPCG-17 – A randomised trial of active surveillance in prostate cancer: rationale and design

|                               |                                                                                                                                                                                                                                                                                                                                                                                                                                                                                                                                                                                                                                                                                                                                                                                                                                                                                                                                                                                                                                                                                                                                                                                                                                                                                                                                                                                                                                                                                                                                                                                                                                                                                                                                                                                                                                                                                  |
|-------------------------------|----------------------------------------------------------------------------------------------------------------------------------------------------------------------------------------------------------------------------------------------------------------------------------------------------------------------------------------------------------------------------------------------------------------------------------------------------------------------------------------------------------------------------------------------------------------------------------------------------------------------------------------------------------------------------------------------------------------------------------------------------------------------------------------------------------------------------------------------------------------------------------------------------------------------------------------------------------------------------------------------------------------------------------------------------------------------------------------------------------------------------------------------------------------------------------------------------------------------------------------------------------------------------------------------------------------------------------------------------------------------------------------------------------------------------------------------------------------------------------------------------------------------------------------------------------------------------------------------------------------------------------------------------------------------------------------------------------------------------------------------------------------------------------------------------------------------------------------------------------------------------------|
| Journal:                      | <i>BMJ Open</i>                                                                                                                                                                                                                                                                                                                                                                                                                                                                                                                                                                                                                                                                                                                                                                                                                                                                                                                                                                                                                                                                                                                                                                                                                                                                                                                                                                                                                                                                                                                                                                                                                                                                                                                                                                                                                                                                  |
| Manuscript ID                 | bmjopen-2018-027860                                                                                                                                                                                                                                                                                                                                                                                                                                                                                                                                                                                                                                                                                                                                                                                                                                                                                                                                                                                                                                                                                                                                                                                                                                                                                                                                                                                                                                                                                                                                                                                                                                                                                                                                                                                                                                                              |
| Article Type:                 | Research                                                                                                                                                                                                                                                                                                                                                                                                                                                                                                                                                                                                                                                                                                                                                                                                                                                                                                                                                                                                                                                                                                                                                                                                                                                                                                                                                                                                                                                                                                                                                                                                                                                                                                                                                                                                                                                                         |
| Date Submitted by the Author: | 19-Nov-2018                                                                                                                                                                                                                                                                                                                                                                                                                                                                                                                                                                                                                                                                                                                                                                                                                                                                                                                                                                                                                                                                                                                                                                                                                                                                                                                                                                                                                                                                                                                                                                                                                                                                                                                                                                                                                                                                      |
| Complete List of Authors:     | <p>Ahlberg, Mats; Uppsala Universitet Institutionen for kirurgiska vetenskaper<br/> Adami, Hans-Olov; Karolinska Institutet Department of Medical Epidemiology and Biostatistics; Harvard University T H Chan School of Public Health, Department of Epidemiology<br/> Beckman, Kerri; King's College London Translational Oncology and Urology Research; University of Southern Australia Centre for Population Health Research<br/> Bertilsson, Helena; Sankt Olavs Hospital Universitetssykehuset i Trondheim, Department of Urology; NTNU - Norwegian University of Science and Technology, Faculty of Medicine and Health Sciences<br/> Borre, Michael; Aarhus Universitetshospital, Department of Urology<br/> Bratt, Ola; Goteborgs universitet Sahlgrenska Akademin, Department of Urology<br/> Cahill, Declan; The Royal Marsden Hospital, London<br/> Egevad, Lars; Karolinska Universitetssjukhuset, Department of Pathology<br/> Garmo, Hans; King's College London, School of Cancer &amp; Pharmaceutical Sciences; Regional Cancer Centre Uppsala/Örebro<br/> Holmberg, Lars; Kings College London School of Medicine, Division of Cancer Studies; Regional Cancer Centre Uppsala/Örebro<br/> Johansson, Eva; Uppsala Universitet Institutionen for kirurgiska vetenskaper<br/> Rannikko, Antti; Helsinki University and Helsinki University Hospital<br/> Van Hemelrijck, Mieke; Kings College London, Translational Oncology &amp; Urology Offices<br/> Jäderling, Fredrik; Karolinska Universitetssjukhuset, Radiology Department; Karolinska Institutet Department of Molecular Medicine and Surgery<br/> Wassberg, Cecilia; Karolinska Universitetssjukhuset, Radiology Department<br/> Åberg, Ulrika; Uppsala Universitet Institutionen for kirurgiska vetenskaper<br/> Bill-Axelson, Anna; Uppsala Universitet Institutionen for kirurgiska vetenskaper</p> |
| Keywords:                     | Active surveillance, MRI, Prostate cancer, Randomised trial                                                                                                                                                                                                                                                                                                                                                                                                                                                                                                                                                                                                                                                                                                                                                                                                                                                                                                                                                                                                                                                                                                                                                                                                                                                                                                                                                                                                                                                                                                                                                                                                                                                                                                                                                                                                                      |
|                               |                                                                                                                                                                                                                                                                                                                                                                                                                                                                                                                                                                                                                                                                                                                                                                                                                                                                                                                                                                                                                                                                                                                                                                                                                                                                                                                                                                                                                                                                                                                                                                                                                                                                                                                                                                                                                                                                                  |

1  
2  
3  
4  
5  
6  
7  
8  
9  
10  
11  
12  
13  
14  
15  
16  
17  
18  
19  
20  
21  
22  
23  
24  
25  
26  
27  
28  
29  
30  
31  
32  
33  
34  
35  
36  
37  
38  
39  
40  
41  
42  
43  
44  
45  
46  
47  
48  
49  
50  
51  
52  
53  
54  
55  
56  
57  
58  
59  
60

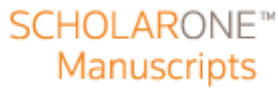

# PCASTt/SPCG-17 – A randomised trial of active surveillance in prostate cancer: rationale and design

Mats S. Ahlberg<sup>a</sup>, Hans-Olov Adami<sup>b,c,d</sup>, Kerri Beckmann<sup>e,f</sup>, Helena Bertilsson<sup>g,h</sup>, Michael Borre<sup>i</sup>, Ola Bratt<sup>j</sup>, Declan Cahill<sup>k</sup>, Lars Egevad<sup>l</sup>, Hans Garmo<sup>m,n</sup>, Lars Holmberg<sup>a,o</sup> Eva Johansson<sup>a</sup>, Antti Rannikko<sup>p</sup>, Mieke Van Hemelrijck<sup>q</sup>, Fredrik Jäderling<sup>r,s</sup>, Cecilia Wassberg<sup>t</sup>, Ulrika WN. Åberg<sup>a</sup>, Anna Bill-Axelsson<sup>a</sup> for the SPCG-17 study group

<sup>a</sup>Department of surgical sciences, Uppsala University, Uppsala, Sweden; <sup>b</sup>Department of Medical Epidemiology and Biostatistics, Karolinska Institutet, Stockholm, Sweden; <sup>c</sup>Department of Epidemiology, Harvard T.H. Chan School of Public Health, Boston, MA, USA; <sup>d</sup>Clinical effectiveness Research Group, Institute of Health and Society, University of Oslo, Oslo, Norway; <sup>e</sup>Translational Oncology and Urology Research, King's College, London, UK; <sup>f</sup>Centre for Population Health Research, University of South Australia, Adelaide, Australia; <sup>g</sup>Department of Urology, St Olavs Hospital, Trondheim University Hospital, Trondheim, Norway; <sup>h</sup>Department of Cancer Research and Molecular Medicine, Faculty of Medicine and Health Sciences, NTNU – Norwegian University of Science and Technology, Trondheim, Norway; <sup>i</sup>Department of Urology, Aarhus University Hospital, Aarhus, Denmark; <sup>j</sup>Department of Urology, Sahlgrenska Academy, University of Gothenburg, Gothenburg, Sweden; <sup>k</sup>The Royal Marsden Hospital, London, UK; <sup>l</sup>Department of pathology, Karolinska University Hospital, Stockholm, Sweden; <sup>m</sup>Regional Cancer Centre Uppsala Örebro Region, Uppsala, Sweden; <sup>n</sup>Comprehensive Cancer Centre, School of Cancer & Pharmaceutical Sciences, Faculty of Life Sciences & Medicine, King's College London, London, UK; <sup>o</sup>King's College London, Faculty of Life sciences and Medicine, London, UK; <sup>p</sup>Helsinki University and Helsinki University Hospital, Helsinki, Finland; <sup>q</sup>Department of Cancer Epidemiology and Population Health, King's College London, London, UK; <sup>r</sup>Department of Radiology, Karolinska University Hospital, Stockholm, Sweden; <sup>s</sup>Department of Molecular Medicine and Surgery, Karolinska Institutet, Stockholm, Sweden;

Corresponding author: Mats S. Ahlberg

Mailing address: Urologiska kliniken; Akademiska sjukhuset ing. 70 1 tr; 75185 Uppsala; Sweden

Telephone number: +46 70 207 29 11

Fax Number: +46 18 55 91 59

E-mail address: [mats.ahlberg@surgsci.uu.se](mailto:mats.ahlberg@surgsci.uu.se)

Keywords Active surveillance; MRI; prostate cancer; randomised trial

SPCG-17 study group:

## Sweden:

Göteborg: Johan Stranne, Jonas Wallström

Uppsala: Eva Johansson, Pär Dahlman

Umeå: Bengt Friedrich, Conny Ström

Luleå/Sunderby: Periklis Koumoutsakos, Annika Larsson

Sundsvall: Mattias Tell, Magnus Alm

Linköping/Norrköping: Jon Forsberg, Aus Saudi

Örebro: Ove Andrén, Wolfgang Krauss

## Finland:

Helsinki: Antti Rannikko, Hanna Vasarainen, Anu Kenttämies

## Norway:

Trondheim: Helena Bertilsson, Sverre Langørgen

## Denmark:

Aarhus: Michael Borre, Bodil Ginnerup Pedersen

## Abstract

### Objective:

To evaluate the safety of a magnetic resonance imaging (MRI)-based active surveillance protocol with standardised triggers for repeated biopsies and radical treatment to reduce overtreatment of prostate cancer.

### Design, Setting and Participants:

In all, 2000 men will be randomised between current practice and standardised triggers at centers in Sweden, Norway, Finland, Denmark and United Kingdom. Men with prostate cancer (diagnosed within 12 months),  $\leq$ T2a, prostate specific antigen (PSA)  $<15$  ng/ml, PSA density  $\leq 0.2$  ng/ml/cc, any International Society of Urological Pathology (ISUP) Grade 1 or ISUP Grade 2 ( $<30$  % of cores (systematic biopsies),  $< 10$  mm cancer in one core (systematic or targeted biopsies)) are eligible. If diagnosed with systematic biopsies, MRI with biopsies targeted against Prostate Imaging and Reporting Data System version 2 (PI-RADS) 3-5 lesions are mandatory before inclusion. Identical basic follow-up in the two study arms: bi-annual PSA-testing, yearly clinical examination and MRI every second year.

### Interventions:

In the experimental arm, only standardised triggers based on MRI and PSA density elicit repeated biopsies. MRI and histopathological progression trigger radical treatment.

### Outcome measurements and statistical analysis:

Primary outcome: progression-free survival. Secondary endpoints: cumulative incidence of metastatic disease, treatments with curative intent, pT3-4 at radical prostatectomy, switch to watchful waiting, prostate cancer mortality and quality of life.

**Results:**

The study started inclusion in October 2016 and in October 2018, 275 patients were enrolled.

**Conclusions:**

PCASTt/SPCG-17 evaluates an MRI-based active surveillance protocol with standardised triggers for biopsy and treatment that intend to reduce overtreatment of prostate cancer without compromising patient outcome.

**Trial registration:**

The trial is registered to ClinicalTrials.gov, identification: NCT02914873. Study ID Numbers at ClinicalTrials.gov is SPCG-17.

## Article summary

PCASTt/SPCG-17 is a randomised clinical trial of an MRI-based active surveillance protocol with defined triggers for repeated biopsies and radical treatment of prostate cancer. We will evaluate the safety of the surveillance protocol compared to current practice.

### *Strengths and limitations of the study*

- The randomised design reduces chances of observed outcome being influenced by confounding factors.
- The trial size will allow quantifying clinically relevant endpoints with reasonable statistical precision.
- International multicentre study making results more generalisable.
- Limitations include long follow-up that has to be undertaken to assess tumour progression.

## Introduction

Following the introduction of PSA testing in the late 1980s, the incidence of prostate cancer increased dramatically in many countries <sup>1</sup>. Widespread PSA testing led to a downward stage migration, with a growing proportion of small and well differentiated cancers with low malignant potential even if left untreated <sup>2</sup>.

Although overdiagnosis of prostate cancers has been documented on a group level <sup>2</sup>, currently it is not possible to know if an individual man with prostate cancer will experience progression to lethal disease or not. As a consequence, many men unnecessarily undergo radical treatment. To reduce overtreatment and its side effects, without jeopardizing the potential benefit of radical treatment, active surveillance with selective, delayed therapy with curative intent was developed in the late 1990s <sup>3</sup>.

In active surveillance, treatment with curative intent is initiated when and if investigations indicate progressive cancer. In watchful waiting only palliative treatment is initiated at symptoms. Several national guidelines recommend active surveillance for most low-risk cancers and selected favourable intermediate-risk cancers <sup>4</sup>. Different criteria are used to trigger radical treatment, but many patients are treated with curative intent without objective signs of disease progression <sup>5</sup>. Although multiple active surveillance cohorts show low rates of disease progression <sup>6</sup>, no randomised trials help define which patients are suitable for active surveillance, how to monitor them or when to initiate treatment with curative intent. To fill some of these evidence gaps and reduce both over- and undertreatment, the Scandinavian Prostate Cancer Group (SPCG) is promoting a multinational randomised trial, Prostate Cancer Active Surveillance Trigger trial (PCASTt/SPCG-17), in which standardised triggers for repeat biopsies and initiation of treatment with curative intent, is compared with current



1  
2  
3 clinical practice for active surveillance of low-risk and favourable intermediate-risk prostate  
4 cancer.  
5  
6  
7  
8  
9

## 10 **Areas of uncertainty**

### 11 *Active Surveillance or immediate treatment with curative intent*

12  
13  
14 None of three randomised trials has shown substantial survival benefit of radical treatment  
15 compared with watchful waiting or active monitoring in men with low-risk PCa<sup>7-9</sup>. The  
16  
17 SPCG-4 trial began in 1989, i.e. before the PSA era, and included primarily men with  
18 palpable tumours. In this trial, radical prostatectomy resulted in a 3.8% (95% CI, -4,6 to 12,2)  
19 lower prostate cancer mortality in men with low-risk cancer, compared with watchful waiting,  
20 after 18 years of follow-up<sup>7</sup>. In the PIVOT trial, including predominantly men with PSA  
21 detected localised cancer, there was a 4% absolute reduction of prostate cancer specific  
22 mortality (95% CI, -0,2 to 8,3) after radical prostatectomy, compared with observation, after  
23 nearly 20 years of follow-up. Events were few in the subgroup analysis, ensuing low  
24 statistical precision<sup>8</sup>. In ProtecT, only men with PSA-detected tumours were included. After  
25 ten years of follow-up, prostate cancer specific survival was similar in the three treatment  
26 groups: 98.8% (95% CI, 98.4-99.5) after initial active monitoring, 99.0% (95% CI, 97.2-99.6)  
27 in men allocated to radical prostatectomy and 99.6% (95% CI, 98.4-99.9) in men allocated to  
28 radiotherapy, but progression to metastatic disease was less common after curative treatment  
29  
30  
31  
32  
33  
34  
35  
36  
37  
38  
39  
40  
41  
42  
43  
44  
45  
46  
47  
48  
49  
50  
51  
52  
53  
54  
55  
56  
57  
58  
59  
60

### 51 *Criteria for active surveillance*

52  
53 Most published active surveillance protocols include men with low-risk disease (ISUP grade 1  
54 (Gleason score 3+3=6), T1c-T2a and PSA < 10 ng/ml), but some include intermediate-risk  
55 disease (ISUP grade 2 (Gleason score 3+4=7), T1c-T2 and PSA 10-20 ng/ml)<sup>6</sup>. ProtecT, the

1  
2  
3 only randomised trial addressing the question of active monitoring vs curative treatment,  
4 included all localised risk-groups but predominantly low risk. They found a higher risk of  
5 progression to metastases with active monitoring compared to radical treatment, after ten  
6 years<sup>9</sup>. However, active monitoring in their protocol consisted of repeated PSA-testing but  
7 apart from that was not specifically regulated.  
8  
9  
10  
11  
12  
13  
14  
15  
16

### 17 *Follow-up during active surveillance*

18  
19 Active surveillance protocols differ, but they typically include repeated digital rectal  
20 examinations, PSA testing and systematic, transrectal biopsies. Interpretation of digital rectal  
21 examination is subjective and cannot detect tumours in the anterior part of the prostate, which  
22 limit its usefulness<sup>10</sup>. PSA values fluctuate over time<sup>11</sup>, and raising values may reflect  
23 inflammation or progression of benign hyperplasia, rather than tumour progression.  
24 Systematic biopsies can easily miss small multifocal cancers and large tumours in the anterior  
25 prostate. Histopathological evaluation of the specimen shows considerable inter-individual  
26 variation between pathologists<sup>12</sup>.  
27  
28  
29  
30  
31  
32  
33  
34  
35  
36  
37  
38  
39

### 40 *Repeated biopsy and conversion to radical treatment*

41  
42 In Sweden, 30-40% of men managed by active surveillance receive treatment with curative  
43 intent within five years after diagnosis<sup>13</sup>. In a nationwide study, active surveillance was  
44 discontinued because of “patient preference” in 20%, by PSA progression in 52% and by  
45 biopsy progression in 24% of the men<sup>13</sup>. In the PRIAS study, about half of the men switched  
46 to curative treatment within 2.3 years<sup>14</sup>. Worry about whether the patient has an undetected  
47 high-risk cancer, without objective signs of progression or high-risk cancer, may entail  
48 unnecessary repeated biopsies and treatment to accommodate the clinicians’ and the patients’  
49 concerns. Conversely, digital rectal examination, PSA and standard biopsies have low  
50  
51  
52  
53  
54  
55  
56  
57  
58  
59  
60

1  
2  
3 sensitivity to detect high-grade cancer <sup>10-12</sup>. Hence, we don't know when repeated biopsies are  
4  
5 required and when radical treatment is beneficial.  
6  
7  
8  
9

### 10 *Magnetic resonance imaging*

11  
12 The use of MRI in the assessment of prostate cancer has increased. There is high level  
13  
14 evidence that MRI has the ability to detect prostate cancer <sup>15,16</sup>, but there is insufficient  
15  
16 evidence on the benefit of repeated MRI during active surveillance <sup>17</sup>. According to the  
17  
18 PROMIS study, MRI may reduce the proportion of men undergoing a prostate biopsy by one  
19  
20 fourth, and the proportion of men diagnosed with clinically insignificant cancer by five  
21  
22 percent, at the cost of delaying the diagnosis of a clinically significant cancer (defined as  
23  
24 presence of any ISUP grade  $\geq 3$  (Gleason score  $4+3=7$ ) or a maximum cancer core length  
25  
26 involvement of 6 mm or more in any location) in three percent of the men <sup>18</sup>. The negative  
27  
28 predictive value of an unsuspecting MRI finding is high, and even higher when PSA density is  
29  
30 low <sup>19</sup>.  
31  
32  
33  
34  
35  
36  
37

38 The randomised PRECISION trial indicates that MRI with targeted biopsies has higher  
39  
40 detection rate than standard biopsies for ISUP grade  $\geq 2$  prostate cancer and reduces the  
41  
42 detection of ISUP grade 1 cancer in biopsy naïve patients with clinical suspicion of prostate  
43  
44 cancer <sup>20</sup>. In a retrospective review of repeated biopsies during active surveillance, MRI with  
45  
46 targeted biopsies nearly doubled the detection of pathological progression compared to  
47  
48 systematic biopsies <sup>21</sup>. This is however questioned by a recent prospective trial that showed  
49  
50 no increase in up-grading with additional targeted biopsies vs systematic biopsies alone <sup>22</sup>.  
51  
52  
53  
54  
55  
56  
57  
58  
59  
60

### *Active surveillance in intermediate-risk prostate cancer*

The risk of cancer progression during active surveillance of patients with low-risk prostate cancer is low, but varies between studies, probably because of different inclusion criteria and indications for therapeutic intervention<sup>6</sup>. Active surveillance of intermediate-risk prostate cancer is debated, but it is supported by some data<sup>23</sup>. The Sunnybrook cohort - including men with low-risk and favourable intermediate-risk prostate cancer - showed a 2.8% progression to metastatic disease and 1.5% prostate cancer specific mortality within 15 years<sup>24</sup>, with a more favourable outcome for men with low-risk cancer<sup>25</sup>. Eligibility was not influenced by PSA density or number of positive cores, and MRI was not used. Based on findings that MRI with targeted biopsies has a higher detection rate than standard biopsies for ISUP grade  $\geq 2$  prostate cancer<sup>20</sup> one must assume that many intermediate and high-risk tumours were undetected in this cohort. Despite this, the long-term cancer specific survival was high.

### **The PCASTt/ SPCG-17 trial**

#### *Study design*

PCASTt/SPCG-17 is a multinational randomised trial comparing active surveillance using standardised triggers for repeated biopsy and radical treatment with current practice. The hypothesis is that standardised triggers will reduce overtreatment and adverse events and improve quality of life, without increasing disease progression or prostate cancer mortality. Approval for the trial was obtained from the Regional Ethical Review Board in Uppsala (2016/204).

#### *Outcome measures*

The primary endpoint is progression-free survival. Progression is defined as PSA relapse after treatment with curative intent (PSA level of  $>0.2$  ng/ml following surgery, PSA level increase

1  
2  
3 of >2 ng/ml in consecutive PSA measurements following the first PSA measurement after  
4 radiotherapy and PSA level increase of >2ng/ml following radiotherapy and androgen  
5 deprivation therapy) or start of androgen deprivation therapy in previously untreated men.  
6  
7  
8  
9  
10 Secondary endpoints are the cumulative incidence of pT3 tumours, distant metastasis,  
11  
12 treatment with curative intent and switch to watchful waiting. Prostate cancer death is the  
13  
14 final endpoint at ten years. Quality-of-life endpoints will be analysed separately.  
15  
16  
17  
18

19 *Participants & participating centres (Table 1, Table 2)*  
20

21 Eligible for inclusion are men with histopathological low-risk or favourable intermediate-risk  
22  
23 adenocarcinoma of the prostate diagnosed within 12 months, who have not received any  
24  
25 treatment and have at least ten years' expected lifetime. All men primarily diagnosed with  
26  
27 prostate cancer from systematic biopsies should undergo MRI with biopsies targeted at PI-  
28  
29 RADS 3-5 lesions before inclusion. For men primarily diagnosed with prostate cancer  
30  
31 following MRI with targeted biopsies, subsequent systematic biopsies are optional. Centres in  
32  
33 Sweden, Denmark, Finland, Norway and UK will participate.  
34  
35  
36  
37  
38  
39  
40  
41  
42  
43  
44  
45  
46  
47  
48  
49  
50  
51  
52  
53  
54  
55  
56  
57  
58  
59  
60

**Table 1 – inclusion criteria**

- Adenocarcinoma of the prostate diagnosed within the past 12 months
- Tumour stage  $\leq$ T2a, NX, M0
- PSA <15 ng/ml and PSA density  $\leq$ 0.2 ng/ml/cc
- Systematic biopsies with  $\geq$ 10 cores (optional, if the diagnosis is based on MRI with targeted biopsies)
- MRI with targeted biopsies towards PI-RADS 3, 4 and 5 (according to PI-RADS v. 2)
- ISUP grade 1 (any number of cores, any involvement)
- ISUP grade 2 in <3 cores (or <30% of cores if >10 systematic cores were taken) and <10 mm cancer in one core (systematic or targeted)
- Life expectancy  $\geq$ 10 years (no upper age limit)
- Candidate for curative treatment (surgery or radiotherapy) if progression occurs
- Signed written informed consent

PSA=Prostate Specific Antigen, MRI=Magnetic Resonance Imaging, PI-RADS=Prostate Imaging Reporting and Data System, ISUP = International Society of Urological Pathology

**Table 2 – demands on participating centres**

- The local organisation should commit to recruiting all consecutive patients who are willing to start on active surveillance and who fulfil the inclusion criteria
- A 1.5 or 3 Tesla MRI
- Access to prostate MRI expertise. If the local competence is uncertain, the national PI will organise external expertise for MRI evaluation
- The MRI should follow European Society of Urogenital Radiology (ESUR) guidelines and include:
  - T1- and T2-weighted images
  - Diffusion-weighted images (DWI) including Apparent Diffusion Coefficient (ADC)
  - Dynamic contrast enhanced (DCE) imaging and Magnetic Resonance Spectroscopy Imaging (MRSI) are optional

- The MR images should be reported according to PI-RADS v. 2

MRI=Magnetic Resonance Imaging, PI-RADS=Prostate Imaging Reporting and Data System  
PCASTt/SPCG-17 aims to randomise 2,000 patients in 4 years, which will give an 85%  
power to detect a 1.3 percentage points progression-free survival difference between the study  
arms (2-sided alpha 0.05) under the assumption that 90% of the patients are managed per  
protocol according to randomisation. The progression-free survival in the current practise  
group five years after randomisation is assumed to be 98%, based on previous studies <sup>24</sup>.

#### *Patient reported outcome measures and follow-up*

At inclusion and every second year during follow-up participants are requested to fill out a  
study-specific quality-of-life questionnaire including the Expanded Prostate cancer Index  
Composite (EPIC-26) <sup>26</sup>, for separate quality-of-life analysis.

Basic follow-up is identical in both arms, with biannual PSA testing, annual clinical  
examination and MRI scan every second year (Figure 1). In the current practice arm,  
additional investigations are optional and it is up to the urologist to decide when it is time to  
repeat biopsies and initiate treatment with curative intent. In the experimental arm, follow-up  
is according to schedule, biopsies are only taken if the standardised triggers are reached  
(Table 3) and treatment with curative intent is only recommended if standardised triggers for  
radical treatment are reached (Table 4). At every follow-up, the patient is categorised as  
having no distant metastasis, suspected distant metastasis (according to PSA-level and/or  
symptoms) or verified distant metastasis (imaging or histopathology/cytology).

1  
2  
3  
4  
5  
6  
7  
8  
9  
10  
11  
12  
13  
14  
15  
16  
17  
18  
19  
20  
21  
22  
23  
24  
25  
26  
27  
28  
29  
30  
31  
32  
33  
34  
35  
36  
37  
38  
39  
40  
41  
42  
43  
44  
45  
46  
47  
48  
49  
50  
51  
52  
53  
54  
55  
56  
57  
58  
59  
60

Table 3 – triggers for re-

biopsies

**ARM I**

**According to current practice  
(the urologists' judgement)**

**ARM**

**2**

**I.**

**PSA density >0.2 ng/ml/cc (systematic  
biopsies)**

**II.**

**MRI progression in men with ISUP  
grade 1 cancer (targeted biopsies)**

- ≥5 mm or more increase in size in any dimension of a measurable lesion (defined as ≥6 mm in longest diameter in any dimension in best depicted MR sequence)
- Increase in PI-RADS score to 3,4 or 5
- High suspicion of extra-capsular extension or seminal vesicle invasion (level of suspicion to be 4 or 5 on Likert scale)
- A new lesion with PI-RADS score 3-5

**III.**

**MRI progression in men with ISUP  
grade 2 cancer (targeted biopsies)**

- ≥5 mm or more increase in size in any dimension of a measurable lesion (a measurable lesion is defined as ≥6 mm in longest diameter in any dimension in best depicted MR sequence)
- A new lesion with PI-RADS 3-5

PSA=Prostate Specific Antigen, PI-RADS=Prostate Imaging Reporting and Data System,

MRI=Magnetic

Resonance Imaging, ISUP = International Society of Urological Pathology



1  
2  
3  
4  
5  
6  
7  
8  
9  
10  
11 **Table 4 – triggers for radical treatment**

| <b>ARM I</b>                                                     | <b>ARM 2</b>                                                                                                                                                                                                                                                                                                                                                                                                                                                                                                                                                                                                                                                                                                                                                                                                                                                                                                                                                                                                                                                                              |
|------------------------------------------------------------------|-------------------------------------------------------------------------------------------------------------------------------------------------------------------------------------------------------------------------------------------------------------------------------------------------------------------------------------------------------------------------------------------------------------------------------------------------------------------------------------------------------------------------------------------------------------------------------------------------------------------------------------------------------------------------------------------------------------------------------------------------------------------------------------------------------------------------------------------------------------------------------------------------------------------------------------------------------------------------------------------------------------------------------------------------------------------------------------------|
| <b>According to current practice (the urologist's judgement)</b> | <p data-bbox="598 506 638 542"><b>I.</b></p> <p data-bbox="805 506 1252 586"><b>MRI progression in lesions with confirmed Gleason pattern 4</b></p> <ul data-bbox="853 589 1316 855" style="list-style-type: none"> <li data-bbox="853 589 1316 654">- Increase in PI-RADS score to 4 or 5</li> <li data-bbox="853 656 1316 855">- High suspicion of extra-capsular extension or seminal vesicle invasion (level of suspicion to be 4 or 5 on the Likert scale)</li> </ul> <p data-bbox="598 884 638 920"><b>II.</b></p> <p data-bbox="805 884 1157 920"><b>Pathological progression</b></p> <ul data-bbox="853 922 1316 1236" style="list-style-type: none"> <li data-bbox="853 922 1157 958">- Gleason pattern 5</li> <li data-bbox="853 960 1316 1041">- Primary Gleason pattern 4 in any core with <math>\geq 5</math> mm cancer</li> <li data-bbox="853 1043 1316 1236">- ISUP grade 2 in <math>\geq 3</math> cores (or <math>\geq 30\%</math> of cores if <math>&gt; 10</math> systematic cores), or <math>\geq 10</math> mm cancer in one core (systematic or targeted)</li> </ul> |

12  
13  
14  
15  
16  
17  
18  
19  
20  
21  
22  
23  
24  
25  
26  
27  
28  
29  
30  
31  
32  
33  
34  
35  
36  
37 MRI=Magnetic Resonance Imaging, PI-RADS=Prostate Imaging Reporting and Data System

38  
39  
40  
41 Follow-up continues according to the protocol until initiation of treatment with curative  
42 intent, detection of metastasis, switch from active surveillance to watchful waiting or death of  
43 any cause. For men who discontinue active surveillance, the follow-up and management  
44 continue according to standard clinical practice but with annual reporting in the study. In  
45 patients lost to follow-up, endpoints will be assessed through available registers in the  
46 participating countries.  
47  
48  
49  
50  
51  
52  
53

#### 54 *Patient and Public Involvement*

55  
56 Patient experiences and priorities is important knowledge that may influence the definition of  
57 research questions. Patients were however not directly involved in designing this study,  
58  
59  
60

defining outcome measures, the recruitment to and conduct of the study. A summary of results will be available for all participants and will also be presented to patient organisations and the public.

#### *Experience from first two years of inclusion*

The first patient was included in October 2016 at Uppsala University Hospital, Sweden. In 2017, six additional Swedish centres began enrolment and three Norwegian centres started enrolling patients in 2018. Centres in Finland, Denmark and the UK aim to start including patients later in 2018. Characteristics of the first 275 randomised patients are displayed in Table 5. Patients are stratified based on participating centre and Gleason score.

**Table 5 - baseline characteristics for the first 275 included patients**

|                                      | Current practice | Standardised triggers |
|--------------------------------------|------------------|-----------------------|
| <b>n</b>                             | 139              | 136                   |
| <b>Age (yr, mean (SD))</b>           | 62 (6.2)         | 64 (6.2)              |
| <b>PSA (ng/ml, mean, (SD))</b>       | 5.1 (2.3)        | 5.8 (2.3)             |
| <b>PSA-D (ng/ml/cc, mean (SD))</b>   | 0.11 (0.04)      | 0.12 (0.04)           |
| <b>Clinical tumour stage (n (%))</b> |                  |                       |
| T1c                                  | 109 (78)         | 115 (85)              |
| T2a                                  | 29 (21)          | 21 (15)               |
| unknown                              | 1 (1)            | 0                     |
| <b>Comorbidity (n (%))</b>           |                  |                       |
| ASA 1                                | 94 (68)          | 84 (62)               |
| ASA 2                                | 40 (29)          | 52 (38)               |
| ASA 3                                | 4 (3)            | 0                     |
| unknown                              | 1 (1)            | 0                     |
| <b>Family history of PCa (n (%))</b> |                  |                       |
| Yes                                  | 33 (24)          | 38 (28)               |
| No                                   | 102 (73)         | 95 (70)               |
| Unknown                              | 4 (3)            | 3 (2)                 |
| <b>MRI technique (n (%))</b>         |                  |                       |
| 1.5 Tesla                            | 20 (14)          | 16 (12)               |
| 3 Tesla                              | 118 (85)         | 116 (85)              |
| Unknown                              | 1 (1)            | 4 (3)                 |
| <b>MRI findings (n (%))</b>          |                  |                       |
| PI-RADS 1-2                          | 76 (55)          | 55 (40)               |
| PI-RADS 3-5                          | 63 (45)          | 81 (60)               |

yr = years, SD = standard deviation, PSA = prostate specific antigen, n = sample size, ASA = American Society of Anesthesiologists classification, PCa = prostate cancer, MRI = magnetic resonance imaging, PI-RADS = Prostate Imaging Reporting and Data System

## Discussion

The increasing use of active surveillance has reduced overtreatment of prostate cancer to some extent, but still a large number of men are overtreated<sup>2</sup>. Clearly, more patients should start on active surveillance, and fewer patients on active surveillance should convert to radical treatment.

Over the last decades there has been a Gleason score/ISUP grade inflation, partly due to the 2005 revision of the Gleason pattern definitions. The revision entailed that many patterns previously designated Gleason pattern 3 are now reported as pattern 4 and that the Gleason score/ISUP grade on needle biopsies always includes the highest Gleason grade, even if it is just a minimal component<sup>27</sup>. Because long-term outcomes of active surveillance and watchful waiting are chiefly based on studies undertaken before the 2005 revision, a substantial proportion of low-risk tumours in those studies would today be classified as intermediate-risk. Despite this, they had excellent survival without treatment. These results and the changes in Gleason grading suggests that also men with favourable intermediate-risk prostate cancer should be offered active surveillance. This is supported by the fact that MRI with targeted biopsies detects favourable intermediate-risk tumours that standard biopsies do not detect<sup>18,20</sup>. Hence, if all men with intermediate risk prostate cancer undergo immediate radical treatment, overtreatment would increase.

In PCASTt/SPCG-17, follow-up during active surveillance is based on PSA testing and repeated MRI, not on repeated systematic biopsies. Prostate biopsies are uncomfortable and distressful. They cause bleeding, sometimes urinary retention and about six percent experience febrile infection and one percent develop sepsis<sup>28</sup>. The incidence of serious infections is rising because of multidrug resistant bacteria<sup>29</sup>. It is therefore desirable to reduce

1  
2  
3 the number of biopsies during active surveillance. In the experimental arm of PCASTt/SPCG-  
4  
5 17, biopsies are only performed when triggered which will likely reduce the number of  
6  
7 biopsies. MRI with targeted biopsies detect at least as many histopathological intermediate-  
8  
9 risk tumours as standard biopsies in biopsy naïve men<sup>20,21</sup>, suggesting that MRI with targeted  
10  
11 biopsies is viable in a surveillance program.  
12  
13  
14  
15  
16

17 In PCASTt/SPCG-17 pre-specified changes in MRI trigger targeted biopsies to assess  
18  
19 histopathological progression. Since histopathological progression may occur without MRI  
20  
21 changes, the protocol also stipulates systematic biopsies if PSA density increases above pre-  
22  
23 specified limits (Table 3). Radical treatment is triggered by MRI findings suggesting  
24  
25 progression of a known ISUP grade 2 tumour and by biopsies showing more than a defined  
26  
27 upper limit of Gleason pattern 4 or any Gleason pattern 5 (Table 4).  
28  
29  
30  
31  
32

33 The strengths of PCASTt/SPCG-17 includes the randomised design and a trial size that will  
34  
35 allow quantifying clinically relevant endpoints with reasonable statistical precision. A data  
36  
37 monitoring and safety committee will oversee patient safety and the trial's scientific integrity.  
38  
39 The safety of the MRI-based follow-up will be regularly evaluated by comparing the outcome  
40  
41 with a matched group of men managed by active surveillance in the Swedish SAMS study,  
42  
43 who are on active surveillance based on systematic transrectal biopsies<sup>30</sup>. During the long-  
44  
45 term follow-up, new methods for monitoring and treatment might be introduced and applied  
46  
47 in our patient cohort, obscuring the interpretation of the results. Furthermore, over time the  
48  
49 triggers for repeated biopsies and treatment in the PCASTt/SPCG-17 trial's standard  
50  
51 treatment arm might become more similar to the management of the men in the experimental  
52  
53 group. Although this will affect the trial's ability to detect any difference between the two  
54  
55 groups, the PCASTt/SPCG-17 experimental arm can still be used to assess the clinical safety  
56  
57  
58  
59  
60

1  
2  
3 and acceptability of a standardised protocol and provide prospective data on the performance  
4  
5 of MRI as a monitoring tool – both aspects key to patient safety under AS.  
6  
7  
8  
9  
10  
11  
12  
13

### 14 *Conclusion*

15  
16 PCASTt/SPCG-17 is a randomised trial that evaluates the safety of an MRI-based active  
17  
18 surveillance protocol, comparing standardised triggers for repeat biopsies and curative  
19  
20 treatment. If the protocol proves to be as safe as current clinical practice, its implementation  
21  
22 could lead to a reduction of the number of biopsies, reduce overtreatment of prostate cancer  
23  
24 without compromising the outcome of the patients in terms of morbidity and mortality.  
25  
26  
27  
28  
29  
30  
31  
32  
33  
34  
35  
36  
37  
38  
39  
40  
41  
42  
43  
44  
45  
46  
47  
48  
49  
50  
51  
52  
53  
54  
55  
56  
57  
58  
59  
60

1  
2  
3  
4  
5  
6  
7  
8  
9  
10  
11  
12  
13  
14  
15 *Contributors:*

16 All authors (MSA, H-OA, LH, AB-A, KB, HB, MB, OB, DC, LE, HG, EJ, AR, MVH, FJ,  
17 CW and UWNÅ) have made the following contributions to the work: Substantial  
18 contributions to the conception or design of the work; or the acquisition, analysis, or  
19 interpretation of data for the work. Drafting the work or revising it critically for important  
20 intellectual content. Final approval of the version to be published. Agreement to be  
21 accountable for all aspects of the work in ensuring that questions related to the accuracy or  
22 integrity of any part of the work are appropriately investigated and resolved.  
23  
24  
25  
26  
27  
28  
29  
30  
31  
32  
33  
34

35 *Acknowledgement statement:*

36  
37 The authors thank the following contributors to the study; Monica Andersson, Kerstin  
38 Almroth, Ann-Charlotte Borgefeldt, Britt-Inger Dahlin, Christina Danewid, Kristina From,  
39 Chatrine Hasselberg, Pernilla Helgesson, Søren Høyer, Helene Krook, Christofer Lagerros,  
40 Malin Lindell, Tuomas Mirtti, Annica Nilsson, Madeleine Nilsson, Hanna Nyberg, Merja  
41 Rignell, Inger Johanne Stokkan, Malin Ståhlgren, Øystein Størkersen and the SPCG-17 study  
42 group.  
43  
44  
45  
46  
47  
48  
49  
50  
51

52  
53 *Funding:*

54  
55 This study was supported by grants from the Swedish Cancer Society (2016/466 and  
56 2014/1275), the Swedish Research Council (2016–00177 and 2016–01293), the Nordic  
57  
58  
59  
60

1  
2  
3 Cancer Union and the Percy Falk Foundation to Dr. Bill-Axelsson and the Karolinska Institutet  
4  
5 Distinguished Professor Award to Dr. Hans-Olov Adami (2368/10-221). The founding  
6  
7 sources had no influence in the study.  
8  
9

10  
11  
12  
13  
14  
15 *Declaration of interest:*

16  
17 None of the contributing authors have any conflicts of interest.  
18  
19

20  
21  
22 *Data sharing statement:*

23  
24 No individual participant data will be available. What data that will be shared, when it will be  
25  
26 available, to whom and to what type of analyses is not applicable. Study protocol is available.  
27  
28  
29  
30  
31  
32  
33  
34  
35  
36  
37  
38  
39  
40  
41  
42  
43  
44  
45  
46  
47  
48  
49  
50  
51  
52  
53  
54  
55  
56  
57  
58  
59  
60

## References

1. Ferlay J SI, Ervik M, Dikshit R, Eser S, Mathers C, Rebelo M, Parkin DM, Forman D, Bray, F. GLOBOCAN 2012 v1.0, Cancer Incidence and Mortality Worldwide: IARC CancerBase No. 11 [Internet]. . Lyon, France: International Agency for Research on Cancer. 2013.
2. Klotz L. Prostate cancer overdiagnosis and overtreatment. *Current opinion in endocrinology, diabetes, and obesity*. 2013;20(3):204-209.
3. Klotz LH. Active surveillance for good risk prostate cancer: rationale, method, and results. *Can J Urol*. 2005;12 Suppl 2:21-24.
4. Bruinsma SM, Bangma CH, Carroll PR, et al. Active surveillance for prostate cancer: a narrative review of clinical guidelines. *Nat Rev Urol*. 2016;13(3):151-167.
5. Simpkin AJ, Tilling K, Martin RM, et al. Systematic Review and Meta-analysis of Factors Determining Change to Radical Treatment in Active Surveillance for Localized Prostate Cancer. *Eur Urol*. 2015;67(6):993-1005.
6. Dall'Era MA, Albertsen PC, Bangma C, et al. Active surveillance for prostate cancer: a systematic review of the literature. *Eur Urol*. 2012;62(6):976-983.
7. Bill-Axelson A, Holmberg L, Garmo H, et al. Radical prostatectomy or watchful waiting in early prostate cancer. *The New England journal of medicine*. 2014;370(10):932-942.
8. Wilt TJ, Jones KM, Barry MJ, et al. Follow-up of Prostatectomy versus Observation for Early Prostate Cancer. *The New England journal of medicine*. 2017;377(2):132-142.
9. Hamdy FC, Donovan JL, Lane JA, et al. 10-Year Outcomes after Monitoring, Surgery, or Radiotherapy for Localized Prostate Cancer. *The New England journal of medicine*. 2016;375(15):1415-1424.
10. Naji L, Randhawa H, Sohani Z, et al. Digital Rectal Examination for Prostate Cancer Screening in Primary Care: A Systematic Review and Meta-Analysis. *Annals of family medicine*. 2018;16(2):149-154.
11. Eastham JA, Riedel E, Scardino PT, et al. Variation of serum prostate-specific antigen levels: an evaluation of year-to-year fluctuations. *Jama*. 2003;289(20):2695-2700.
12. Berney DM, Algaba F, Camparo P, et al. The reasons behind variation in Gleason grading of prostatic biopsies: areas of agreement and misconception among 266 European pathologists. *Histopathology*. 2014;64(3):405-411.



13. Loeb S, Folkvaljon Y, Makarov DV, Bratt O, Bill-Axelsson A, Stattin P. Five-year nationwide follow-up study of active surveillance for prostate cancer. *Eur Urol*. 2015;67(2):233-238.
14. Drost FH, Rannikko A, Valdagni R, et al. Can active surveillance really reduce the harms of overdiagnosing prostate cancer? A reflection of real life clinical practice in the PRIAS study. *Translational andrology and urology*. 2018;7(1):98-105.
15. Futterer JJ, Briganti A, De Visschere P, et al. Can Clinically Significant Prostate Cancer Be Detected with Multiparametric Magnetic Resonance Imaging? A Systematic Review of the Literature. *Eur Urol*. 2015;68(6):1045-1053.
16. Weinreb JC, Barentsz JO, Choyke PL, et al. PI-RADS Prostate Imaging - Reporting and Data System: 2015, Version 2. *Eur Urol*. 2016;69(1):16-40.
17. Scarpato KR, Barocas DA. Use of mpMRI in active surveillance for localized prostate cancer. *Urol Oncol*. 2016;34(7):320-325.
18. Ahmed HU, El-Shater Bosaily A, Brown LC, et al. Diagnostic accuracy of multi-parametric MRI and TRUS biopsy in prostate cancer (PROMIS): a paired validating confirmatory study. *Lancet (London, England)*. 2017;389(10071):815-822.
19. Distler FA, Radtke JP, Bonekamp D, et al. The Value of PSA Density in Combination with PI-RADS for the Accuracy of Prostate Cancer Prediction. *J Urol*. 2017;198(3):575-582.
20. Kasivisvanathan V, Rannikko AS, Borghi M, et al. MRI-Targeted or Standard Biopsy for Prostate-Cancer Diagnosis. *The New England journal of medicine*. 2018.
21. Frye TP, George AK, Kilchevsky A, et al. Magnetic Resonance Imaging-Transrectal Ultrasound Guided Fusion Biopsy to Detect Progression in Patients with Existing Lesions on Active Surveillance for Low and Intermediate Risk Prostate Cancer. *J Urol*. 2017;197(3 Pt 1):640-646.
22. Klotz L, Loblaw A, Sugar L, et al. Active Surveillance Magnetic Resonance Imaging Study (ASIST): Results of a Randomized Multicenter Prospective Trial. *Eur Urol*. 2018.
23. Klotz L. Active Surveillance for Intermediate Risk Prostate Cancer. *Curr Urol Rep*. 2017;18(10):80.
24. Klotz L, Vesprini D, Sethukavalan P, et al. Long-term follow-up of a large active surveillance cohort of patients with prostate cancer. *Journal of clinical oncology : official journal of the American Society of Clinical Oncology*. 2015;33(3):272-277.
25. Musunuru HB, Yamamoto T, Klotz L, et al. Active Surveillance for Intermediate Risk Prostate Cancer: Survival Outcomes in the Sunnybrook Experience. *J Urol*. 2016;196(6):1651-1658.
26. Szymanski KM, Wei JT, Dunn RL, Sanda MG. Development and validation of an abbreviated version of the expanded prostate cancer index composite instrument for measuring health-related quality of life among prostate cancer survivors. *Urology*. 2010;76(5):1245-1250.
27. Danneman D, Drevin L, Robinson D, Stattin P, Egevad L. Gleason inflation 1998-2011: a registry study of 97,168 men. *BJU international*. 2015;115(2):248-255.
28. Lundstrom KJ, Drevin L, Carlsson S, et al. Nationwide population based study of infections after transrectal ultrasound guided prostate biopsy. *J Urol*. 2014;192(4):1116-1122.
29. Zowawi HM, Harris PN, Roberts MJ, et al. The emerging threat of multidrug-resistant Gram-negative bacteria in urology. *Nat Rev Urol*. 2015;12(10):570-584.

- 1  
2  
3 30. Bratt O, Carlsson S, Holmberg E, et al. The Study of Active Monitoring in Sweden  
4 (SAMS): a randomized study comparing two different follow-up schedules for active  
5 surveillance of low-risk prostate cancer. *Scand J Urol*. 2013;47(5):347-355.  
6  
7  
8  
9  
10  
11  
12  
13  
14  
15  
16  
17  
18  
19  
20  
21  
22  
23  
24  
25  
26  
27  
28  
29  
30  
31  
32  
33  
34  
35  
36  
37  
38  
39  
40  
41  
42  
43  
44  
45  
46  
47  
48  
49  
50  
51  
52  
53  
54  
55  
56  
57  
58  
59  
60

For peer review only

1  
2  
3  
4  
5  
6  
7  
8  
9  
10  
11  
12  
13  
14  
15  
16  
17  
18  
19  
20  
21  
22  
23  
24  
25  
26  
27  
28  
29  
30  
31  
32  
33  
34  
35  
36  
37  
38  
39  
40  
41  
42  
43  
44  
45  
46  
47  
48  
49  
50  
51  
52  
53  
54  
55  
56  
57  
58  
59  
60

Figure 1 – Basic follow-up

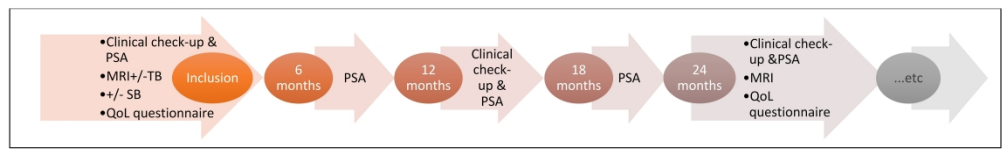

PSA=Prostate Specific Antigen, MRI=Magnetic Resonance Imaging, TB=Targeted Biopsies, SB=Systematic Biopsies, QoL=Quality of Life

286x59mm (600 x 600 DPI)

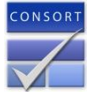

## CONSORT 2010 checklist of information to include when reporting a randomised trial\*

| Section/Topic                    | Item No | Checklist item                                                                                                                                                                              | Reported on page No |
|----------------------------------|---------|---------------------------------------------------------------------------------------------------------------------------------------------------------------------------------------------|---------------------|
| <b>Title and abstract</b>        |         |                                                                                                                                                                                             |                     |
|                                  | 1a      | Identification as a randomised trial in the title                                                                                                                                           | 1                   |
|                                  | 1b      | Structured summary of trial design, methods, results, and conclusions (for specific guidance see CONSORT for abstracts)                                                                     | 2,3                 |
| <b>Introduction</b>              |         |                                                                                                                                                                                             |                     |
| Background and objectives        | 2a      | Scientific background and explanation of rationale                                                                                                                                          | 5,6,7,8,9,          |
|                                  | 2b      | Specific objectives or hypotheses                                                                                                                                                           | 9                   |
| <b>Methods</b>                   |         |                                                                                                                                                                                             |                     |
| Trial design                     | 3a      | Description of trial design (such as parallel, factorial) including allocation ratio                                                                                                        | 9                   |
|                                  | 3b      | Important changes to methods after trial commencement (such as eligibility criteria), with reasons                                                                                          | n/a                 |
| Participants                     | 4a      | Eligibility criteria for participants                                                                                                                                                       | 10,11               |
|                                  | 4b      | Settings and locations where the data were collected                                                                                                                                        | 14                  |
| Interventions                    | 5       | The interventions for each group with sufficient details to allow replication, including how and when they were actually administered                                                       | 12,13,14            |
| Outcomes                         | 6a      | Completely defined pre-specified primary and secondary outcome measures, including how and when they were assessed                                                                          | 9,10                |
|                                  | 6b      | Any changes to trial outcomes after the trial commenced, with reasons                                                                                                                       | n/a                 |
| Sample size                      | 7a      | How sample size was determined                                                                                                                                                              | 12                  |
|                                  | 7b      | When applicable, explanation of any interim analyses and stopping guidelines                                                                                                                | n/a                 |
| <b>Randomisation:</b>            |         |                                                                                                                                                                                             |                     |
| Sequence generation              | 8a      | Method used to generate the random allocation sequence                                                                                                                                      | In protocol         |
|                                  | 8b      | Type of randomisation; details of any restriction (such as blocking and block size)                                                                                                         | In protocol         |
| Allocation concealment mechanism | 9       | Mechanism used to implement the random allocation sequence (such as sequentially numbered containers), describing any steps taken to conceal the sequence until interventions were assigned | In protocol         |
| Implementation                   | 10      | Who generated the random allocation sequence, who enrolled participants, and who assigned participants to interventions                                                                     | In protocol         |

|    |                                                      |     |                                                                                                                                                   |                         |
|----|------------------------------------------------------|-----|---------------------------------------------------------------------------------------------------------------------------------------------------|-------------------------|
| 1  | Blinding                                             | 11a | If done, who was blinded after assignment to interventions (for example, participants, care providers, those assessing outcomes) and how          | n/a                     |
| 2  |                                                      |     |                                                                                                                                                   |                         |
| 3  |                                                      | 11b | If relevant, description of the similarity of interventions                                                                                       | 12,13,14                |
| 4  | Statistical methods                                  | 12a | Statistical methods used to compare groups for primary and secondary outcomes                                                                     | n/a                     |
| 5  |                                                      | 12b | Methods for additional analyses, such as subgroup analyses and adjusted analyses                                                                  | n/a                     |
| 6  |                                                      |     |                                                                                                                                                   |                         |
| 7  | <b>Results</b>                                       |     |                                                                                                                                                   |                         |
| 8  | Participant flow (a diagram is strongly recommended) | 13a | For each group, the numbers of participants who were randomly assigned, received intended treatment, and were analysed for the primary outcome    | n/a                     |
| 9  |                                                      | 13b | For each group, losses and exclusions after randomisation, together with reasons                                                                  | n/a                     |
| 10 | Recruitment                                          | 14a | Dates defining the periods of recruitment and follow-up                                                                                           | n/a                     |
| 11 |                                                      | 14b | Why the trial ended or was stopped                                                                                                                | n/a                     |
| 12 | Baseline data                                        | 15  | A table showing baseline demographic and clinical characteristics for each group                                                                  | 15                      |
| 13 | Numbers analysed                                     | 16  | For each group, number of participants (denominator) included in each analysis and whether the analysis was by original assigned groups           | n/a                     |
| 14 |                                                      |     |                                                                                                                                                   |                         |
| 15 | Outcomes and estimation                              | 17a | For each primary and secondary outcome, results for each group, and the estimated effect size and its precision (such as 95% confidence interval) | n/a                     |
| 16 |                                                      | 17b | For binary outcomes, presentation of both absolute and relative effect sizes is recommended                                                       | n/a                     |
| 17 | Ancillary analyses                                   | 18  | Results of any other analyses performed, including subgroup analyses and adjusted analyses, distinguishing pre-specified from exploratory         | n/a                     |
| 18 |                                                      |     |                                                                                                                                                   |                         |
| 19 | Harms                                                | 19  | All important harms or unintended effects in each group (for specific guidance see CONSORT for harms)                                             | n/a                     |
| 20 |                                                      |     |                                                                                                                                                   |                         |
| 21 | <b>Discussion</b>                                    |     |                                                                                                                                                   |                         |
| 22 | Limitations                                          | 20  | Trial limitations, addressing sources of potential bias, imprecision, and, if relevant, multiplicity of analyses                                  | 17                      |
| 23 | Generalisability                                     | 21  | Generalisability (external validity, applicability) of the trial findings                                                                         | 17                      |
| 24 | Interpretation                                       | 22  | Interpretation consistent with results, balancing benefits and harms, and considering other relevant evidence                                     | n/a                     |
| 25 |                                                      |     |                                                                                                                                                   |                         |
| 26 | <b>Other information</b>                             |     |                                                                                                                                                   |                         |
| 27 | Registration                                         | 23  | Registration number and name of trial registry                                                                                                    | 3                       |
| 28 | Protocol                                             | 24  | Where the full trial protocol can be accessed, if available                                                                                       | Uploaded in scholar one |
| 29 |                                                      |     |                                                                                                                                                   |                         |
| 30 | Funding                                              | 25  | Sources of funding and other support (such as supply of drugs), role of funders                                                                   | 19                      |
| 31 |                                                      |     |                                                                                                                                                   |                         |

1 \*We strongly recommend reading this statement in conjunction with the CONSORT 2010 Explanation and Elaboration for important clarifications on all the items. If relevant, we also  
2 recommend reading CONSORT extensions for cluster randomised trials, non-inferiority and equivalence trials, non-pharmacological treatments, herbal interventions, and pragmatic trials.  
3 Additional extensions are forthcoming: for those and for up to date references relevant to this checklist, see [www.consort-statement.org](http://www.consort-statement.org).  
4  
5  
6  
7  
8  
9  
10  
11  
12  
13  
14  
15  
16  
17  
18  
19  
20  
21  
22  
23  
24  
25  
26  
27  
28  
29  
30  
31  
32  
33  
34  
35  
36  
37  
38  
39  
40  
41  
42

For peer review only

# BMJ Open

## PCASTt/SPCG-17 – A randomised trial of active surveillance in prostate cancer: rationale and design

|                                 |                                                                                                                                                                                                                                                                                                                                                                                                                                                                                                                                                                                                                                                                                                                                                                                                                                                                                                                                                                                                                                                                                                                                                                                                                                                                                                                                                                                                                                                                                                                                                                                                                                                                                                                                                                                                                                                                                                                                                                                                                                                   |
|---------------------------------|---------------------------------------------------------------------------------------------------------------------------------------------------------------------------------------------------------------------------------------------------------------------------------------------------------------------------------------------------------------------------------------------------------------------------------------------------------------------------------------------------------------------------------------------------------------------------------------------------------------------------------------------------------------------------------------------------------------------------------------------------------------------------------------------------------------------------------------------------------------------------------------------------------------------------------------------------------------------------------------------------------------------------------------------------------------------------------------------------------------------------------------------------------------------------------------------------------------------------------------------------------------------------------------------------------------------------------------------------------------------------------------------------------------------------------------------------------------------------------------------------------------------------------------------------------------------------------------------------------------------------------------------------------------------------------------------------------------------------------------------------------------------------------------------------------------------------------------------------------------------------------------------------------------------------------------------------------------------------------------------------------------------------------------------------|
| Journal:                        | <i>BMJ Open</i>                                                                                                                                                                                                                                                                                                                                                                                                                                                                                                                                                                                                                                                                                                                                                                                                                                                                                                                                                                                                                                                                                                                                                                                                                                                                                                                                                                                                                                                                                                                                                                                                                                                                                                                                                                                                                                                                                                                                                                                                                                   |
| Manuscript ID                   | bmjopen-2018-027860.R1                                                                                                                                                                                                                                                                                                                                                                                                                                                                                                                                                                                                                                                                                                                                                                                                                                                                                                                                                                                                                                                                                                                                                                                                                                                                                                                                                                                                                                                                                                                                                                                                                                                                                                                                                                                                                                                                                                                                                                                                                            |
| Article Type:                   | Protocol                                                                                                                                                                                                                                                                                                                                                                                                                                                                                                                                                                                                                                                                                                                                                                                                                                                                                                                                                                                                                                                                                                                                                                                                                                                                                                                                                                                                                                                                                                                                                                                                                                                                                                                                                                                                                                                                                                                                                                                                                                          |
| Date Submitted by the Author:   | 10-Apr-2019                                                                                                                                                                                                                                                                                                                                                                                                                                                                                                                                                                                                                                                                                                                                                                                                                                                                                                                                                                                                                                                                                                                                                                                                                                                                                                                                                                                                                                                                                                                                                                                                                                                                                                                                                                                                                                                                                                                                                                                                                                       |
| Complete List of Authors:       | <p>Ahlberg, Mats; Uppsala Universitet Institutionen for kirurgiska vetenskaper<br/>           Adami, Hans-Olov; Karolinska Institutet Department of Medical Epidemiology and Biostatistics; Harvard University T H Chan School of Public Health, Department of Epidemiology<br/>           Beckmann, Kerri; King's College London Translational Oncology and Urology Research; University of Southern Australia Centre for Population Health Research<br/>           Bertilsson, Helena; Sankt Olavs Hospital Universitetssykehuset i Trondheim, Department of Urology; NTNU - Norwegian University of Science and Technology, Faculty of Medicine and Health Sciences<br/>           Borre, Michael; Aarhus Universitetshospital, Department of Urology<br/>           Bratt, Ola; Goteborgs universitet Sahlgrenska Akademin, Department of Urology<br/>           Cahill, Declan; The Royal Marsden Hospital, London<br/>           Egevad, Lars; Karolinska Universitetssjukhuset, Department of Pathology<br/>           Garmo, Hans; King's College London, School of Cancer &amp; Pharmaceutical Sciences; Regional Cancer Centre Uppsala/Örebro<br/>           Holmberg, Lars; Kings College London School of Medicine, Division of Cancer Studies; Regional Cancer Centre Uppsala/Örebro<br/>           Johansson, Eva; Uppsala Universitet Institutionen for kirurgiska vetenskaper<br/>           Rannikko, Antti; Helsinki University and Helsinki University Hospital<br/>           Van Hemelrijck, Mieke; Kings College London, Translational Oncology &amp; Urology Offices<br/>           Jäderling, Fredrik; Karolinska Universitetssjukhuset, Radiology Department; Karolinska Institutet Department of Molecular Medicine and Surgery<br/>           Wassberg, Cecilia; Karolinska Universitetssjukhuset, Radiology Department<br/>           Åberg, Ulrika; Uppsala Universitet Institutionen for kirurgiska vetenskaper<br/>           Bill-Axelson, Anna; Uppsala Universitet Institutionen for kirurgiska vetenskaper</p> |
| <b>Primary Subject Heading</b>: | Urology                                                                                                                                                                                                                                                                                                                                                                                                                                                                                                                                                                                                                                                                                                                                                                                                                                                                                                                                                                                                                                                                                                                                                                                                                                                                                                                                                                                                                                                                                                                                                                                                                                                                                                                                                                                                                                                                                                                                                                                                                                           |
| Secondary Subject Heading:      | Urology                                                                                                                                                                                                                                                                                                                                                                                                                                                                                                                                                                                                                                                                                                                                                                                                                                                                                                                                                                                                                                                                                                                                                                                                                                                                                                                                                                                                                                                                                                                                                                                                                                                                                                                                                                                                                                                                                                                                                                                                                                           |
| Keywords:                       | Active surveillance, MRI, Prostate cancer, Randomised trial                                                                                                                                                                                                                                                                                                                                                                                                                                                                                                                                                                                                                                                                                                                                                                                                                                                                                                                                                                                                                                                                                                                                                                                                                                                                                                                                                                                                                                                                                                                                                                                                                                                                                                                                                                                                                                                                                                                                                                                       |

1  
2  
3  
4  
5  
6  
7  
8  
9  
10  
11  
12  
13  
14  
15  
16  
17  
18  
19  
20  
21  
22  
23  
24  
25  
26  
27  
28  
29  
30  
31  
32  
33  
34  
35  
36  
37  
38  
39  
40  
41  
42  
43  
44  
45  
46  
47  
48  
49  
50  
51  
52  
53  
54  
55  
56  
57  
58  
59  
60

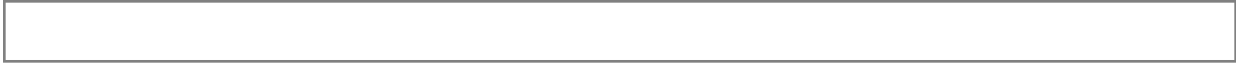

SCHOLARONE™  
Manuscripts



# PCASTt/SPCG-17 – A randomised trial of active surveillance in prostate cancer: rationale and design

Mats S. Ahlberg<sup>a</sup>, Hans-Olov Adami<sup>b,c,d</sup>, Kerri Beckmann<sup>e,f</sup>, Helena Bertilsson<sup>g,h</sup>, Michael Borre<sup>i</sup>, Ola Bratt<sup>j</sup>, Declan Cahill<sup>k</sup>, Lars Egevad<sup>l</sup>, Hans Garmo<sup>m,n</sup>, Lars Holmberg<sup>a,o</sup> Eva Johansson<sup>a</sup>, Antti Rannikko<sup>p</sup>, Mieke Van Hemelrijck<sup>q</sup>, Fredrik Jäderling<sup>r,s</sup>, Cecilia Wassberg<sup>t</sup>, Ulrika WN. Åberg<sup>a</sup>, Anna Bill-Axelsson<sup>a</sup> for the SPCG-17 study group

<sup>a</sup>Department of surgical sciences, Uppsala University, Uppsala, Sweden; <sup>b</sup>Department of Medical Epidemiology and Biostatistics, Karolinska Institutet, Stockholm, Sweden; <sup>c</sup>Department of Epidemiology, Harvard T.H. Chan School of Public Health, Boston, MA, USA; <sup>d</sup>Clinical effectiveness Research Group, Institute of Health and Society, University of Oslo, Oslo, Norway; <sup>e</sup>Translational Oncology and Urology Research, King's College, London, UK; <sup>f</sup>Centre for Population Health Research, University of South Australia, Adelaide, Australia; <sup>g</sup>Department of Urology, St Olavs Hospital, Trondheim University Hospital, Trondheim, Norway; <sup>h</sup>Department of Cancer Research and Molecular Medicine, Faculty of Medicine and Health Sciences, NTNU – Norwegian University of Science and Technology, Trondheim, Norway; <sup>i</sup>Department of Urology, Aarhus University Hospital, Aarhus, Denmark; <sup>j</sup>Department of Urology, Sahlgrenska Academy, University of Gothenburg, Gothenburg, Sweden; <sup>k</sup>The Royal Marsden Hospital, London, UK; <sup>l</sup>Department of pathology, Karolinska University Hospital, Stockholm, Sweden; <sup>m</sup>Regional Cancer Centre Uppsala Örebro Region, Uppsala, Sweden; <sup>n</sup>Comprehensive Cancer Centre, School of Cancer & Pharmaceutical Sciences, Faculty of Life Sciences & Medicine, King's College London, London, UK; <sup>o</sup>King's College London, Faculty of Life sciences and Medicine, London, UK; <sup>p</sup>Helsinki University and Helsinki University Hospital, Helsinki, Finland; <sup>q</sup>Department of Cancer Epidemiology and Population Health, King's College London, London, UK; <sup>r</sup>Department of Radiology, Karolinska University Hospital, Stockholm, Sweden; <sup>s</sup>Department of Molecular Medicine and Surgery, Karolinska Institutet, Stockholm, Sweden;

Corresponding author: Mats S. Ahlberg

Mailing address: Urologiska kliniken; Akademiska sjukhuset ing. 70 1 tr; 75185 Uppsala; Sweden

Telephone number: +46 70 207 29 11

Fax Number: +46 18 55 91 59

E-mail address: [mats.ahlberg@surgsci.uu.se](mailto:mats.ahlberg@surgsci.uu.se)

Keywords Active surveillance; MRI; prostate cancer; randomised trial

SPCG-17 study group:

## Sweden:

Göteborg: Johan Stranne, Jonas Wallström

Uppsala: Eva Johansson, Pär Dahlman

Umeå: Bengt Friedrich, Conny Ström

Luleå/Sunderby: Periklis Koumoutsakos, Annika Larsson

Sundsvall: Mattias Tell, Magnus Alm

Linköping/Norrköping: Jon Forsberg, Aus Saudi

Örebro: Ove Andrén, Wolfgang Krauss

## Finland:

Helsinki: Antti Rannikko, Hanna Vasarainen, Anu Kenttämies

## Norway:

Trondheim: Helena Bertilsson, Sverre Langørgen

## Denmark:

Aarhus: Michael Borre, Bodil Ginnerup Pedersen

**Abstract****Introduction:**

Overtreatment of localised prostate cancer is substantial despite increased use of active surveillance.

**Methods and analysis:**

A randomised, multicentre, intervention trial designed to evaluate the safety of an MRI-based active surveillance protocol, with standardised triggers for repeated biopsies and radical treatment, with the aim to reduce overtreatment of prostate cancer. In all, 2000 men will be randomly allocated to either surveillance according to current practice or to standardised triggers at centers in Sweden, Norway, Finland, Denmark and the United Kingdom. Men diagnosed the past 12 months with prostate cancer,  $\leq$ T2a, prostate specific antigen (PSA)  $<15$  ng/ml, PSA density  $\leq 0.2$  ng/ml/cc, any International Society of Urological Pathology (ISUP) Grade Group 1 are eligible. Men with ISUP Grade Group 2 in  $<30$  % of cores on systematic biopsy and  $<10$  mm cancer in one core on systematic or targeted biopsy are also eligible. Men diagnosed on systematic biopsy should have an MRI and targeted biopsies against Prostate Imaging and Reporting Data System version 2 (PI-RADS) 3-5 lesions before inclusion. Identical follow-up in the two study arms: bi-annual PSA-testing, yearly clinical examination and MRI every second year. In the experimental arm, standardised triggers based on MRI and PSA density elicit repeated biopsies. MRI and histopathological progression trigger radical treatment. Primary outcome measure is progression-free survival. Secondary outcome measures are cumulative incidence of metastatic disease, treatments with curative intent, pT3-4 at radical prostatectomy, switch to watchful waiting, prostate cancer mortality and quality of life. Inclusion started in October 2016 and in October 2018; 275 patients have been enrolled.

**Ethics and dissemination:**

Ethical approval was obtained in each participating country before starting inclusion. One county awaits ethical approval. Results for the primary and secondary outcome measures will be submitted for publication in peer-reviewed journals.

**Trial registration number:**

Identification: NCT02914873. Study ID Numbers: SPCG-17.

## Article summary

### *Strengths and limitations of this study*

- The randomised design reduces chances of observed outcome being influenced by confounding factors.
- The trial size will allow quantifying clinically relevant endpoints with reasonable statistical precision.
- International multicentre study making results more generalisable.
- Limitations include long follow-up that has to be undertaken to assess tumour progression.

## Introduction

Following the introduction of PSA testing in the late 1980s, the incidence of prostate cancer increased dramatically in many countries <sup>1</sup>. Widespread PSA testing led to a downward stage migration, with a growing proportion of small and well differentiated cancers with low malignant potential even if left untreated <sup>2</sup>.

Although overdiagnosis of prostate cancers has been documented on a group level <sup>2</sup>, currently it is not possible to know if an individual man with prostate cancer will experience progression to lethal disease or not. As a consequence, many men unnecessarily undergo radical treatment. To reduce overtreatment and its side effects, without jeopardizing the potential benefit of radical treatment, active surveillance with selective, delayed therapy with curative intent was developed in the late 1990s <sup>3</sup>.

In active surveillance, treatment with curative intent is initiated when and if investigations indicate progressive cancer. In watchful waiting only palliative treatment is initiated at symptoms. Several national guidelines recommend active surveillance for most low-risk cancers and selected favourable intermediate-risk cancers <sup>4</sup>. Different criteria are used to trigger radical treatment, but many patients are treated with curative intent without objective signs of disease progression <sup>5</sup>. Although multiple active surveillance cohorts show low rates of disease progression <sup>6</sup>, no randomised trials help define which patients are suitable for active surveillance, how to monitor them or when to initiate treatment with curative intent. To fill some of these evidence gaps and reduce both over- and undertreatment, the Scandinavian Prostate Cancer Group (SPCG) is promoting a multinational randomised trial, Prostate Cancer Active Surveillance Trigger trial (PCASTt/SPCG-17), in which standardised triggers for repeat biopsies and initiation of treatment with curative intent, is compared with current

1  
2  
3 clinical practice for active surveillance of low-risk and favourable intermediate-risk prostate  
4  
5 cancer.  
6  
7  
8  
9

## 10 **Areas of uncertainty**

### 11 *Active Surveillance or immediate treatment with curative intent*

12  
13  
14 None of three randomised trials has shown substantial survival benefit of radical treatment  
15  
16 compared with watchful waiting or active monitoring in men with low-risk PCa<sup>7-9</sup>. The  
17  
18 SPCG-4 trial began in 1989, i.e. before the PSA era, and included primarily men with  
19  
20 palpable tumours. In this trial, radical prostatectomy resulted in a 3.8% (95% CI, -4,6 to 12,2)  
21  
22 lower prostate cancer mortality in men with low-risk cancer, compared with watchful waiting,  
23  
24 after 18 years of follow-up<sup>7</sup>. In the PIVOT trial, including predominantly men with PSA  
25  
26 detected localised cancer, there was a 4% absolute reduction of prostate cancer specific  
27  
28 mortality (95% CI, -0,2 to 8,3) after radical prostatectomy, compared with observation, after  
29  
30 nearly 20 years of follow-up. Events were few in the subgroup analysis, ensuing low  
31  
32 statistical precision<sup>8</sup>. In ProtecT, only men with PSA-detected tumours were included. After  
33  
34 ten years of follow-up, prostate cancer specific survival was similar in the three treatment  
35  
36 groups: 98.8% (95% CI, 98.4-99.5) after initial active monitoring, 99.0% (95% CI, 97.2-99.6)  
37  
38 in men allocated to radical prostatectomy and 99.6% (95% CI, 98.4-99.9) in men allocated to  
39  
40 radiotherapy, but progression to metastatic disease was less common after treatment with  
41  
42 curative intent<sup>9</sup>.  
43  
44  
45  
46  
47  
48  
49  
50

### 51 *Criteria for active surveillance*

52  
53 Most published active surveillance protocols include men with low-risk disease (ISUP grade 1  
54  
55 (Gleason score 3+3=6), T1c-T2a and PSA < 10 ng/ml), but some include intermediate-risk  
56  
57 disease (ISUP grade 2 (Gleason score 3+4=7), T1c-T2 and PSA 10-20 ng/ml)<sup>6</sup>. ProtecT, the  
58  
59  
60

1  
2  
3 only randomised trial addressing the question of active monitoring vs curative treatment,  
4 included all localised risk-groups but predominantly low risk. They found a higher risk of  
5 progression to metastases with active monitoring compared to radical treatment, after ten  
6 years<sup>9</sup>. However, active monitoring in their protocol consisted of repeated PSA-testing but  
7 apart from that was not specifically regulated.  
8  
9  
10  
11  
12  
13  
14  
15  
16

### 17 *Follow-up during active surveillance*

18  
19 Active surveillance protocols differ, but they typically include repeated digital rectal  
20 examinations, PSA testing and systematic, transrectal biopsies. Interpretation of digital rectal  
21 examination is subjective and cannot detect tumours in the anterior part of the prostate, which  
22 limit its usefulness<sup>10</sup>. PSA values fluctuate over time<sup>11</sup>, and raising values may reflect  
23 inflammation or progression of benign hyperplasia, rather than tumour progression.  
24 Systematic biopsies can easily miss small multifocal cancers and large tumours in the anterior  
25 prostate. Histopathological evaluation of the specimen shows considerable inter-individual  
26 variation between pathologists<sup>12</sup>.  
27  
28  
29  
30  
31  
32  
33  
34  
35  
36  
37  
38  
39

### 40 *Repeated biopsy and conversion to radical treatment*

41  
42 In Sweden, 30-40% of men managed by active surveillance receive treatment with curative  
43 intent within five years after diagnosis<sup>13</sup>. In a nationwide study, active surveillance was  
44 discontinued because of “patient preference” in 20%, by PSA progression in 52% and by  
45 biopsy progression in 24% of the men<sup>13</sup>. In the PRIAS study, about half of the men switched  
46 to curative treatment within 2.3 years<sup>14</sup>. Worry about whether the patient has an undetected  
47 high-risk cancer, without objective signs of progression or high-risk cancer, may entail  
48 unnecessary repeated biopsies and treatment to accommodate the clinicians’ and the patients’  
49 concerns. Conversely, digital rectal examination, PSA and systematic biopsies have low  
50  
51  
52  
53  
54  
55  
56  
57  
58  
59  
60

1  
2  
3 sensitivity to detect high-grade cancer <sup>10-12</sup>. Hence, we don't know when repeated biopsies are  
4  
5 required and when radical treatment is beneficial.  
6  
7  
8  
9

### 10 *Magnetic resonance imaging*

11  
12 The use of MRI in the assessment of prostate cancer has increased. There is high level  
13  
14 evidence that MRI has the ability to detect prostate cancer <sup>15,16</sup>, but there is insufficient  
15  
16 evidence on the benefit of repeated MRI during active surveillance <sup>17</sup>. According to the  
17  
18 PROMIS study, MRI may reduce the proportion of men undergoing a prostate biopsy by one  
19  
20 fourth, and the proportion of men diagnosed with clinically insignificant cancer by five  
21  
22 percent, at the cost of delaying the diagnosis of a clinically significant cancer (defined as  
23  
24 presence of any ISUP grade  $\geq 3$  (Gleason score  $4+3=7$ ) or a maximum cancer core length  
25  
26 involvement of 6 mm or more in any location) in three percent of the men <sup>18</sup>. The negative  
27  
28 predictive value of an unsuspecting MRI finding is high, and even higher when PSA density is  
29  
30 low <sup>19</sup>.  
31  
32  
33  
34  
35  
36  
37

38 The randomised PRECISION trial indicates that MRI with targeted biopsies has higher  
39  
40 detection rate than systematic biopsies for ISUP grade  $\geq 2$  prostate cancer and reduces the  
41  
42 detection of ISUP grade 1 cancer in biopsy naïve patients with clinical suspicion of prostate  
43  
44 cancer <sup>20</sup>. In a retrospective review of repeated biopsies during active surveillance, MRI with  
45  
46 targeted biopsies nearly doubled the detection of pathological progression compared to  
47  
48 systematic biopsies <sup>21</sup>. This is however questioned by a recent prospective trial that showed  
49  
50 no increase in up-grading with additional targeted biopsies vs systematic biopsies alone <sup>22</sup>.  
51  
52  
53  
54  
55  
56  
57  
58  
59  
60



### *Active surveillance in intermediate-risk prostate cancer*

The risk of cancer progression during active surveillance of patients with low-risk prostate cancer is low, but varies between studies, probably because of different inclusion criteria and indications for therapeutic intervention<sup>6</sup>. Active surveillance of intermediate-risk prostate cancer is debated, but it is supported by some data<sup>23</sup>. The Sunnybrook cohort - including men with low-risk and favourable intermediate-risk prostate cancer - showed a 2.8% progression to metastatic disease and 1.5% prostate cancer specific mortality within 15 years<sup>24</sup>, with a more favourable outcome for men with low-risk cancer<sup>25</sup>. Eligibility was not influenced by PSA density or number of positive cores, and MRI was not used. Based on findings that MRI with targeted biopsies has a higher detection rate than standard biopsies for ISUP grade  $\geq 2$  prostate cancer<sup>20</sup> one must assume that many intermediate and high-risk tumours were undetected in this cohort. Despite this, the long-term cancer specific survival was high.

### **The PCASTt/ SPCG-17 trial**

#### *Study design*

PCASTt/SPCG-17 is a multinational randomised trial comparing active surveillance using standardised triggers for repeated biopsy and radical treatment with current practice. The hypothesis is that standardised triggers will reduce overtreatment and adverse events and improve quality of life, without increasing disease progression or prostate cancer mortality. Approval for the trial was obtained from the Regional Ethical Review Board in Uppsala (2016/204).

#### *Outcome measures*

1  
2  
3 The primary endpoint is progression-free survival. Progression is defined as biochemical  
4 recurrence after treatment with curative intent or start of androgen deprivation therapy in  
5 previously untreated men. Following radical prostatectomy, biochemical recurrence is defined  
6 as two consecutive rising PSA values >0.2 ng/ml. After primary radiation therapy and  
7 radiation therapy with androgen deprivation therapy, the definition of biochemical recurrence  
8 is any PSA increase 2 ng/ml higher than the PSA nadir value, regardless of the serum  
9 concentration of the nadir<sup>26</sup>. Secondary endpoints are the cumulative incidence of pT3  
10 tumours, distant metastasis, treatment with curative intent and switch to watchful waiting.  
11 Prostate cancer death is the final endpoint at ten years. Quality-of-life endpoints will be  
12 analysed separately.  
13  
14  
15  
16  
17  
18  
19  
20  
21  
22  
23  
24  
25  
26  
27

### 28 *Participants & participating centres*

29  
30 Eligible for inclusion are men with histopathological low-risk or favourable intermediate-risk  
31 adenocarcinoma of the prostate diagnosed within 12 months, who have not received any  
32 treatment and have at least ten years' expected lifetime. All men primarily diagnosed with  
33 prostate cancer from systematic biopsies should undergo MRI with biopsies targeted at PI-  
34 RADS 3-5 lesions before inclusion. For men primarily diagnosed with prostate cancer  
35 following MRI with targeted biopsies, subsequent systematic biopsies are optional. Inclusion  
36 criteria are listed in table 1. Centres in Sweden, Denmark, Finland, Norway and UK will  
37 participate. Demands on participating centres are listed in table 2.  
38  
39  
40  
41  
42  
43  
44  
45  
46  
47  
48  
49  
50  
51  
52  
53  
54  
55  
56  
57  
58  
59  
60

|                              |
|------------------------------|
| Table 1 – inclusion criteria |
|------------------------------|

- Adenocarcinoma of the prostate diagnosed within the past 12 months
- Tumour stage  $\leq$ T2a, NX, M0
- PSA  $<$ 15 ng/ml and PSA density  $\leq$ 0.2 ng/ml/cc
- Systematic biopsies with  $\geq$ 10 cores (optional, if the diagnosis is based on MRI with targeted biopsies)
- MRI with targeted biopsies towards PI-RADS 3, 4 and 5 (according to PI-RADS v. 2)
- ISUP grade 1 (any number of cores, any involvement)
- ISUP grade 2 in  $<$ 3 cores (or  $<$ 30% of cores if  $>$ 10 systematic cores were taken) and  $<$ 10 mm cancer in one core (systematic or targeted)
- Life expectancy  $\geq$ 10 years (no upper age limit)
- Candidate for curative treatment (surgery or radiotherapy) if progression occurs
- Signed written informed consent

PSA=Prostate Specific Antigen, MRI=Magnetic Resonance Imaging, PI-RADS=Prostate Imaging

Reporting

and Data System, ISUP = International Society of Urological Pathology

#### Table 2 – demands on participating centres

- The local organisation should commit to recruiting all consecutive patients who are willing to start on active surveillance and who fulfil the inclusion criteria
- A 1.5 or 3 Tesla MRI
- Access to prostate MRI expertise. If the local competence is uncertain, the national PI will organise external expertise for MRI evaluation
- The MRI should follow European Society of Urogenital Radiology (ESUR) guidelines and include:
  - T1- and T2-weighted images
  - Diffusion-weighted images (DWI) including Apparent Diffusion Coefficient (ADC)
  - Dynamic contrast enhanced (DCE) imaging and Magnetic Resonance Spectroscopy Imaging (MRSI) are optional

- The MR images should be reported according to PI-RADS v. 2

MRI=Magnetic Resonance Imaging, PI-RADS=Prostate Imaging Reporting and Data System  
PCASTt/SPCG-17 aims to randomise 2,000 patients in 4 years, which will give an 85%  
power to detect a 1.3 percentage points progression-free survival difference between the study  
arms (2-sided alpha 0.05) under the assumption that 90% of the patients are managed per  
protocol according to randomisation. The progression-free survival in the current practise  
group five years after randomisation is assumed to be 98%, based on previous studies <sup>24</sup>.

#### *Patient reported outcome measures and follow-up*

At inclusion and every second year during follow-up participants are requested to complete a  
study-specific quality-of-life questionnaire including the Expanded Prostate cancer Index  
Composite (EPIC-26) <sup>27</sup>, for separate quality-of-life analysis.

Basic follow-up is identical in both arms, with biannual PSA testing, annual clinical  
examination and MRI scan every second year (Figure 1). In the current practice arm,  
additional investigations are optional and it is up to the urologist to decide when it is time to  
repeat biopsies and initiate treatment with curative intent. In the experimental arm, follow-up  
is according to schedule, biopsies are only taken if the standardised triggers are reached  
(Table 3) and treatment with curative intent is only recommended if standardised triggers for  
radical treatment are reached (Table 4). At every follow-up, the patient is categorised as  
having no distant metastasis, suspected distant metastasis (according to PSA-level and/or  
symptoms) or verified distant metastasis (imaging or histopathology/cytology).

1  
2  
3  
4  
5  
6  
7  
8  
9  
10  
11  
12  
13  
14  
15  
16  
17  
18  
19  
20  
21  
22  
23  
24  
25  
26  
27  
28  
29  
30  
31  
32  
33  
34  
35  
36  
37  
38  
39  
40  
41  
42  
43  
44  
45  
46  
47  
48  
49  
50  
51  
52  
53  
54  
55  
56  
57  
58  
59  
60

Table 3 – triggers for re-

biopsies

**ARM I**

**According to current practice  
(the urologists' judgement)**

**ARM 2**

- I. PSA density >0.2 ng/ml/cc (systematic biopsies)**
- II. MRI progression in men with ISUP grade 1 cancer (targeted biopsies)**
- ≥5 mm or more increase in size in any dimension of a measurable lesion (a measurable lesion is defined as ≥6 mm in longest diameter in any dimension in best depicted MR sequence)
  - Increase in PI-RADS score to 3,4 or 5
  - High suspicion of extra-capsular extension or seminal vesicle invasion (level of suspicion to be 4 or 5 on Likert scale)
  - A new lesion with PI-RADS score 3-5
- III. MRI progression in men with ISUP grade 2 cancer (targeted biopsies)**
- ≥5 mm or more increase in size in any dimension of a measurable lesion (a measurable lesion is defined as ≥6 mm in longest diameter in any dimension in best depicted MR sequence)
  - A new lesion with PI-RADS 3-5

PSA=Prostate Specific Antigen, PI-RADS=Prostate Imaging Reporting and Data System,

MRI=Magnetic

Resonance Imaging, ISUP = International Society of Urological Pathology

1  
2  
3  
4  
5  
6  
7  
8  
9  
10  
11 **Table 4 – triggers for radical treatment**

| <b>ARM I</b>                                                     | <b>ARM 2</b>                                                                                                                                                                                                                                                                                                                                                                                                                                                                                                                                                                                                                                                                                                                                                                                                                                                                                                                                                                                                                                                                              |
|------------------------------------------------------------------|-------------------------------------------------------------------------------------------------------------------------------------------------------------------------------------------------------------------------------------------------------------------------------------------------------------------------------------------------------------------------------------------------------------------------------------------------------------------------------------------------------------------------------------------------------------------------------------------------------------------------------------------------------------------------------------------------------------------------------------------------------------------------------------------------------------------------------------------------------------------------------------------------------------------------------------------------------------------------------------------------------------------------------------------------------------------------------------------|
| <b>According to current practice (the urologist's judgement)</b> | <p data-bbox="606 504 638 537"><b>I.</b></p> <p data-bbox="813 504 1244 582"><b>MRI progression in lesions with confirmed Gleason pattern 4</b></p> <ul data-bbox="861 582 1315 851" style="list-style-type: none"> <li data-bbox="861 582 1315 649">- Increase in PI-RADS score to 4 or 5</li> <li data-bbox="861 649 1315 851">- High suspicion of extra-capsular extension or seminal vesicle invasion (level of suspicion to be 4 or 5 on the Likert scale)</li> </ul> <p data-bbox="606 884 638 918"><b>II.</b></p> <p data-bbox="813 884 1149 918"><b>Pathological progression</b></p> <ul data-bbox="861 918 1315 1234" style="list-style-type: none"> <li data-bbox="861 918 1149 952">- Gleason pattern 5</li> <li data-bbox="861 952 1315 1030">- Primary Gleason pattern 4 in any core with <math>\geq 5</math> mm cancer</li> <li data-bbox="861 1030 1315 1234">- ISUP grade 2 in <math>\geq 3</math> cores (or <math>\geq 30\%</math> of cores if <math>&gt; 10</math> systematic cores), or <math>\geq 10</math> mm cancer in one core (systematic or targeted)</li> </ul> |

12  
13  
14  
15  
16  
17  
18  
19  
20  
21  
22  
23  
24  
25  
26  
27  
28  
29  
30  
31  
32  
33  
34  
35  
36  
37 MRI=Magnetic Resonance Imaging, PI-RADS=Prostate Imaging Reporting and Data System

38  
39  
40  
41 Follow-up continues according to the protocol until initiation of treatment with curative  
42 intent, detection of metastasis, switch from active surveillance to watchful waiting or death of  
43 any cause. For men who discontinue active surveillance, the follow-up and management  
44 continue according to standard clinical practice but with annual reporting in the study. In  
45 patients lost to follow-up, endpoints will be assessed through available registers in the  
46 participating countries.  
47

#### 48 *Patient and Public Involvement*

49 Patient experiences and priorities is important knowledge that may influence the definition of  
50 research questions. Patients were however not directly involved in designing this study,  
51  
52  
53  
54  
55  
56  
57  
58  
59  
60

defining outcome measures, the recruitment to and conduct of the study. A summary of results will be available for all participants and will also be presented to patient organisations and the public.

#### *Experience from first two years of inclusion*

The first patient was included in October 2016 at Uppsala University Hospital, Sweden. In 2017, six additional Swedish centres began enrolment and three Norwegian centres started enrolling patients in 2018. Centres in Finland, Denmark and the UK aim to start including patients later in 2018. Characteristics of the first 275 randomised patients are displayed in Table 5. Patients are stratified based on participating centre and Gleason score.

**Table 5 - baseline characteristics for the first 275 included patients**

|                                      | Current practice | Standardised triggers |
|--------------------------------------|------------------|-----------------------|
| <b>n</b>                             | 139              | 136                   |
| <b>Age (yr, mean (SD))</b>           | 62 (6.2)         | 64 (6.2)              |
| <b>PSA (ng/ml, mean, (SD))</b>       | 5.1 (2.3)        | 5.8 (2.3)             |
| <b>PSA-D (ng/ml/cc, mean (SD))</b>   | 0.11 (0.04)      | 0.12 (0.04)           |
| <b>Clinical tumour stage (n (%))</b> |                  |                       |
| T1c                                  | 109 (78)         | 115 (85)              |
| T2a                                  | 29 (21)          | 21 (15)               |
| unknown                              | 1 (1)            | 0                     |
| <b>Comorbidity (n (%))</b>           |                  |                       |
| ASA 1                                | 94 (68)          | 84 (62)               |
| ASA 2                                | 40 (29)          | 52 (38)               |
| ASA 3                                | 4 (3)            | 0                     |
| unknown                              | 1 (1)            | 0                     |
| <b>Family history of PCa (n (%))</b> |                  |                       |
| Yes                                  | 33 (24)          | 38 (28)               |
| No                                   | 102 (73)         | 95 (70)               |
| Unknown                              | 4 (3)            | 3 (2)                 |
| <b>MRI technique (n (%))</b>         |                  |                       |
| 1.5 Tesla                            | 20 (14)          | 16 (12)               |
| 3 Tesla                              | 118 (85)         | 116 (85)              |
| Unknown                              | 1 (1)            | 4 (3)                 |
| <b>MRI findings (n (%))</b>          |                  |                       |
| PI-RADS 1-2                          | 76 (55)          | 55 (40)               |
| PI-RADS 3-5                          | 63 (45)          | 81 (60)               |

yr = years, SD = standard deviation, PSA = prostate specific antigen, n = sample size, ASA = American Society of Anesthesiologists classification, PCa = prostate cancer, MRI = magnetic resonance imaging, PI-RADS = Prostate Imaging Reporting and Data System

## Ethics and dissemination

The study has ethical approval from Sweden, Norway, Finland and UK. Denmark awaits ethical approval. The first analysis of primary and secondary end-points will take place one year after all men are included (and then every third year) and be published in peer-reviewed journal.

## Discussion

The increasing use of active surveillance has reduced overtreatment of prostate cancer to some extent, but still a large number of men are overtreated<sup>2</sup>. Clearly, more patients should start on active surveillance, and fewer patients on active surveillance should convert to radical treatment.

Over the last decades there has been a Gleason score/ISUP grade inflation, partly due to the 2005 revision of the Gleason pattern definitions. The revision entailed that many patterns previously designated Gleason pattern 3 are now reported as pattern 4 and that the Gleason score/ISUP grade on needle biopsies always includes the highest Gleason grade, even if it is just a minimal component<sup>28</sup>. Because long-term outcomes of active surveillance and watchful waiting are chiefly based on studies undertaken before the 2005 revision, a substantial proportion of low-risk tumours in those studies would today be classified as intermediate-risk. Despite this, they had excellent survival without treatment. These results and the changes in Gleason grading suggests that also men with favourable intermediate-risk prostate cancer should be offered active surveillance. This is supported by the fact that MRI with targeted biopsies detects favourable intermediate-risk tumours that standard biopsies do not detect<sup>18,20</sup>.



1  
2  
3 Hence, if all men with intermediate risk prostate cancer undergo immediate radical treatment,  
4  
5 overtreatment would increase.  
6  
7

8  
9 In PCASTt/SPCG-17, follow-up during active surveillance is based on PSA testing and  
10  
11 repeated MRI, not on repeated systematic biopsies. Prostate biopsies are uncomfortable and  
12  
13 distressful. They cause bleeding, sometimes urinary retention and about six percent  
14  
15 experience febrile infection and one percent develop sepsis <sup>29</sup>. The incidence of serious  
16  
17 infections is rising because of multidrug resistant bacteria <sup>30</sup>. It is therefore desirable to reduce  
18  
19 the number of biopsies during active surveillance. In the experimental arm of PCASTt/SPCG-  
20  
21 17, biopsies are only performed when triggered which will likely reduce the number of  
22  
23 biopsies. MRI with targeted biopsies detect at least as many histopathological intermediate-  
24  
25 risk tumours as standard biopsies in biopsy naïve men<sup>20,21</sup>, suggesting that MRI with targeted  
26  
27 biopsies is viable in a surveillance program.  
28  
29  
30  
31  
32  
33

34 In PCASTt/SPCG-17 pre-specified changes in MRI trigger targeted biopsies to assess  
35  
36 histopathological progression. Since histopathological progression may occur without MRI  
37  
38 changes, the protocol also stipulates systematic biopsies if PSA density increases above pre-  
39  
40 specified limits (Table 3). Radical treatment is triggered by MRI findings suggesting  
41  
42 progression of a known ISUP grade 2 tumour and by biopsies showing more than a defined  
43  
44 upper limit of Gleason pattern 4 or any Gleason pattern 5 (Table 4).  
45  
46  
47  
48  
49

50 The strengths of PCASTt/SPCG-17 includes the randomised design and a trial size that will  
51  
52 allow quantifying clinically relevant endpoints with reasonable statistical precision. A data  
53  
54 monitoring and safety committee will oversee patient safety and the trial's scientific integrity.  
55  
56 The safety of the MRI-based follow-up will be regularly evaluated by comparing the outcome  
57  
58 with a matched group of men managed by active surveillance in the Swedish SAMS study,  
59  
60

1  
2  
3 who are on active surveillance based on systematic transrectal biopsies<sup>31</sup>. During the long-  
4 term follow-up, new methods for monitoring and treatment might be introduced and applied  
5 in our patient cohort, obscuring the interpretation of the results. Furthermore, over time the  
6 triggers for repeated biopsies and treatment in the PCASTt/SPCG-17 trial's standard  
7 treatment arm might become more similar to the management of the men in the experimental  
8 group. Although this will affect the trial's ability to detect any difference between the two  
9 groups, the PCASTt/SPCG-17 experimental arm can still be used to assess the clinical safety  
10 and acceptability of a standardised protocol and provide prospective data on the performance  
11 of MRI as a monitoring tool – both aspects key to patient safety under AS.  
12  
13  
14  
15  
16  
17  
18  
19  
20  
21  
22  
23  
24  
25

### 26 *Conclusion*

27  
28 PCASTt/SPCG-17 is a randomised trial that evaluates the safety of an MRI-based active  
29 surveillance protocol, comparing standardised triggers for repeat biopsies and curative  
30 treatment. If the protocol proves to be as safe as current clinical practice, its implementation  
31 could lead to a reduction of the number of biopsies, reduce overtreatment of prostate cancer  
32 without compromising the outcome of the patients in terms of morbidity and mortality.  
33  
34  
35  
36  
37  
38  
39  
40  
41  
42  
43  
44  
45  
46  
47  
48  
49  
50  
51  
52  
53  
54  
55  
56  
57  
58  
59  
60

1  
2  
3  
4  
5  
6  
7  
8  
9  
10  
11  
12 *Contributors:*

13  
14 All authors (MSA, H-OA, LH, AB-A, KB, HB, MB, OB, DC, LE, HG, EJ, AR, MVH, FJ,  
15  
16 CW and UWNÅ) have made the following contributions to the work: Substantial  
17  
18 contributions to the conception or design of the work; or the acquisition, analysis, or  
19  
20 interpretation of data for the work. Drafting the work or revising it critically for important  
21  
22 intellectual content. Final approval of the version to be published. Agreement to be  
23  
24 accountable for all aspects of the work in ensuring that questions related to the accuracy or  
25  
26 integrity of any part of the work are appropriately investigated and resolved.  
27  
28  
29  
30  
31

32  
33 *Acknowledgement statement:*

34  
35 The authors thank the following contributors to the study; Monica Andersson, Kerstin  
36  
37 Almroth, Ann-Charlotte Borgefeldt, Britt-Inger Dahlin, Christina Danewid, Kristina From,  
38  
39 Chatrine Hasselberg, Pernilla Helgesson, Søren Høyer, Helene Krook, Christofer Lagerros,  
40  
41 Malin Lindell, Tuomas Mirtti, Annica Nilsson, Madeleine Nilsson, Hanna Nyberg, Merja  
42  
43 Rignell, Inger Johanne Stokkan, Malin Ståhlgren, Øystein Størkersen and the SPCG-17 study  
44  
45 group.  
46  
47  
48  
49  
50

51 *Funding:*

52  
53 This study was supported by grants from the Swedish Cancer Society (2016/466 and  
54  
55 2014/1275), the Swedish Research Council (2016–00177 and 2016–01293), the Nordic  
56  
57 Cancer Union and the Percy Falk Foundation to Dr. Bill-Axelsson and the Karolinska Institutet  
58  
59  
60

1  
2  
3 Distinguished Professor Award to Dr. Hans-Olov Adami (2368/10-221). The founding  
4  
5 sources had no influence in the study.  
6  
7  
8  
9  
10

11  
12 *Declaration of interest:*  
13

14 None of the contributing authors have any conflicts of interest.  
15  
16

17  
18  
19 *Data sharing statement:*  
20

21 No additional data.  
22  
23  
24  
25

26 Figure 1 – Basic follow-up. PSA=Prostate Specific Antigen, MRI=Magnetic Resonance Imaging,  
27  
28 TB=Targeted Biopsies, SB=Systematic Biopsies, QoL=Quality of Life  
29  
30  
31  
32  
33  
34  
35  
36  
37  
38  
39  
40  
41  
42  
43  
44  
45  
46  
47  
48  
49  
50  
51  
52  
53  
54  
55  
56  
57  
58  
59  
60

## References

1. Ferlay J SI, Ervik M, Dikshit R, Eser S, Mathers C, Rebelo M, Parkin DM, Forman D, Bray, F. GLOBOCAN 2012 v1.0, Cancer Incidence and Mortality Worldwide: IARC CancerBase No. 11 [Internet]. . Lyon, France: International Agency for Research on Cancer. 2013.
2. Klotz L. Prostate cancer overdiagnosis and overtreatment. *Current opinion in endocrinology, diabetes, and obesity*. 2013;20(3):204-209.
3. Klotz LH. Active surveillance for good risk prostate cancer: rationale, method, and results. *Can J Urol*. 2005;12 Suppl 2:21-24.
4. Bruinsma SM, Bangma CH, Carroll PR, et al. Active surveillance for prostate cancer: a narrative review of clinical guidelines. *Nat Rev Urol*. 2016;13(3):151-167.
5. Simpkin AJ, Tilling K, Martin RM, et al. Systematic Review and Meta-analysis of Factors Determining Change to Radical Treatment in Active Surveillance for Localized Prostate Cancer. *Eur Urol*. 2015;67(6):993-1005.
6. Dall'era MA, Albertsen PC, Bangma C, et al. Active surveillance for prostate cancer: a systematic review of the literature. *Eur Urol*. 2012;62(6):976-983.
7. Bill-Axelson A, Holmberg L, Garmo H, et al. Radical prostatectomy or watchful waiting in early prostate cancer. *The New England journal of medicine*. 2014;370(10):932-942.
8. Wilt TJ, Jones KM, Barry MJ, et al. Follow-up of Prostatectomy versus Observation for Early Prostate Cancer. *The New England journal of medicine*. 2017;377(2):132-142.
9. Hamdy FC, Donovan JL, Lane JA, et al. 10-Year Outcomes after Monitoring, Surgery, or Radiotherapy for Localized Prostate Cancer. *The New England journal of medicine*. 2016;375(15):1415-1424.
10. Naji L, Randhawa H, Sohani Z, et al. Digital Rectal Examination for Prostate Cancer Screening in Primary Care: A Systematic Review and Meta-Analysis. *Annals of family medicine*. 2018;16(2):149-154.
11. Eastham JA, Riedel E, Scardino PT, et al. Variation of serum prostate-specific antigen levels: an evaluation of year-to-year fluctuations. *Jama*. 2003;289(20):2695-2700.
12. Berney DM, Algaba F, Camparo P, et al. The reasons behind variation in Gleason grading of prostatic biopsies: areas of agreement and misconception among 266 European pathologists. *Histopathology*. 2014;64(3):405-411.
13. Loeb S, Folkvaljon Y, Makarov DV, Bratt O, Bill-Axelson A, Stattin P. Five-year nationwide follow-up study of active surveillance for prostate cancer. *Eur Urol*. 2015;67(2):233-238.

14. Drost FH, Rannikko A, Valdagni R, et al. Can active surveillance really reduce the harms of overdiagnosing prostate cancer? A reflection of real life clinical practice in the PRIAS study. *Translational andrology and urology*. 2018;7(1):98-105.
15. Futterer JJ, Briganti A, De Visschere P, et al. Can Clinically Significant Prostate Cancer Be Detected with Multiparametric Magnetic Resonance Imaging? A Systematic Review of the Literature. *Eur Urol*. 2015;68(6):1045-1053.
16. Weinreb JC, Barentsz JO, Choyke PL, et al. PI-RADS Prostate Imaging - Reporting and Data System: 2015, Version 2. *Eur Urol*. 2016;69(1):16-40.
17. Scarpato KR, Barocas DA. Use of mpMRI in active surveillance for localized prostate cancer. *Urol Oncol*. 2016;34(7):320-325.
18. Ahmed HU, El-Shater Bosaily A, Brown LC, et al. Diagnostic accuracy of multi-parametric MRI and TRUS biopsy in prostate cancer (PROMIS): a paired validating confirmatory study. *Lancet (London, England)*. 2017;389(10071):815-822.
19. Distler FA, Radtke JP, Bonekamp D, et al. The Value of PSA Density in Combination with PI-RADS for the Accuracy of Prostate Cancer Prediction. *J Urol*. 2017;198(3):575-582.
20. Kasivisvanathan V, Rannikko AS, Borghi M, et al. MRI-Targeted or Standard Biopsy for Prostate-Cancer Diagnosis. *The New England journal of medicine*. 2018.
21. Frye TP, George AK, Kilchevsky A, et al. Magnetic Resonance Imaging-Transrectal Ultrasound Guided Fusion Biopsy to Detect Progression in Patients with Existing Lesions on Active Surveillance for Low and Intermediate Risk Prostate Cancer. *J Urol*. 2017;197(3 Pt 1):640-646.
22. Klotz L, Loblaw A, Sugar L, et al. Active Surveillance Magnetic Resonance Imaging Study (ASIST): Results of a Randomized Multicenter Prospective Trial. *Eur Urol*. 2018.
23. Klotz L. Active Surveillance for Intermediate Risk Prostate Cancer. *Curr Urol Rep*. 2017;18(10):80.
24. Klotz L, Vesprini D, Sethukavalan P, et al. Long-term follow-up of a large active surveillance cohort of patients with prostate cancer. *Journal of clinical oncology : official journal of the American Society of Clinical Oncology*. 2015;33(3):272-277.
25. Musunuru HB, Yamamoto T, Klotz L, et al. Active Surveillance for Intermediate Risk Prostate Cancer: Survival Outcomes in the Sunnybrook Experience. *J Urol*. 2016;196(6):1651-1658.
26. Cornford P, Bellmunt J, Bolla M, et al. EAU-ESTRO-SIOG Guidelines on Prostate Cancer. Part II: Treatment of Relapsing, Metastatic, and Castration-Resistant Prostate Cancer. *Eur Urol*. 2017;71(4):630-642.
27. Szymanski KM, Wei JT, Dunn RL, Sanda MG. Development and validation of an abbreviated version of the expanded prostate cancer index composite instrument for measuring health-related quality of life among prostate cancer survivors. *Urology*. 2010;76(5):1245-1250.
28. Danneman D, Drevin L, Robinson D, Stattin P, Egevad L. Gleason inflation 1998-2011: a registry study of 97,168 men. *BJU international*. 2015;115(2):248-255.
29. Lundstrom KJ, Drevin L, Carlsson S, et al. Nationwide population based study of infections after transrectal ultrasound guided prostate biopsy. *J Urol*. 2014;192(4):1116-1122.
30. Zowawi HM, Harris PN, Roberts MJ, et al. The emerging threat of multidrug-resistant Gram-negative bacteria in urology. *Nat Rev Urol*. 2015;12(10):570-584.

- 1  
2  
3 31. Bratt O, Carlsson S, Holmberg E, et al. The Study of Active Monitoring in Sweden  
4 (SAMS): a randomized study comparing two different follow-up schedules for active  
5 surveillance of low-risk prostate cancer. *Scand J Urol*. 2013;47(5):347-355.  
6  
7  
8  
9  
10  
11  
12  
13  
14  
15  
16  
17  
18  
19  
20  
21  
22  
23  
24  
25  
26  
27  
28  
29  
30  
31  
32  
33  
34  
35  
36  
37  
38  
39  
40  
41  
42  
43  
44  
45  
46  
47  
48  
49  
50  
51  
52  
53  
54  
55  
56  
57  
58  
59  
60

For peer review only

1  
2  
3  
4  
5  
6  
7  
8  
9  
10  
11  
12  
13  
14  
15  
16  
17  
18  
19  
20  
21  
22  
23  
24  
25  
26  
27  
28  
29  
30  
31  
32  
33  
34  
35  
36  
37  
38  
39  
40  
41  
42  
43  
44  
45  
46  
47  
48  
49  
50  
51  
52  
53  
54  
55  
56  
57  
58  
59  
60

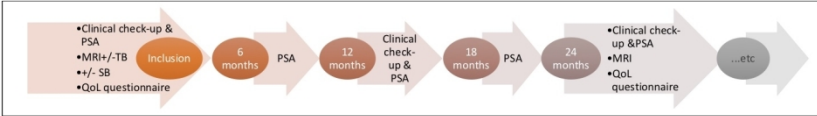

Figure 1 – Basic follow-up. PSA=Prostate Specific Antigen, MRI=Magnetic Resonance Imaging, TB=Targeted Biopsies, SB=Systematic Biopsies, QoL=Quality of Life

297x209mm (150 x 150 DPI)



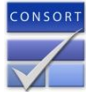

## CONSORT 2010 checklist of information to include when reporting a randomised trial\*

| Section/Topic                    | Item No | Checklist item                                                                                                                                                                              | Reported on page No |
|----------------------------------|---------|---------------------------------------------------------------------------------------------------------------------------------------------------------------------------------------------|---------------------|
| <b>Title and abstract</b>        |         |                                                                                                                                                                                             |                     |
|                                  | 1a      | Identification as a randomised trial in the title                                                                                                                                           | 1                   |
|                                  | 1b      | Structured summary of trial design, methods, results, and conclusions (for specific guidance see CONSORT for abstracts)                                                                     | 2,3                 |
| <b>Introduction</b>              |         |                                                                                                                                                                                             |                     |
| Background and objectives        | 2a      | Scientific background and explanation of rationale                                                                                                                                          | 5,6,7,8,9,          |
|                                  | 2b      | Specific objectives or hypotheses                                                                                                                                                           | 9                   |
| <b>Methods</b>                   |         |                                                                                                                                                                                             |                     |
| Trial design                     | 3a      | Description of trial design (such as parallel, factorial) including allocation ratio                                                                                                        | 9                   |
|                                  | 3b      | Important changes to methods after trial commencement (such as eligibility criteria), with reasons                                                                                          | n/a                 |
| Participants                     | 4a      | Eligibility criteria for participants                                                                                                                                                       | 10,11               |
|                                  | 4b      | Settings and locations where the data were collected                                                                                                                                        | 14                  |
| Interventions                    | 5       | The interventions for each group with sufficient details to allow replication, including how and when they were actually administered                                                       | 12,13,14            |
| Outcomes                         | 6a      | Completely defined pre-specified primary and secondary outcome measures, including how and when they were assessed                                                                          | 9,10                |
|                                  | 6b      | Any changes to trial outcomes after the trial commenced, with reasons                                                                                                                       | n/a                 |
| Sample size                      | 7a      | How sample size was determined                                                                                                                                                              | 12                  |
|                                  | 7b      | When applicable, explanation of any interim analyses and stopping guidelines                                                                                                                | n/a                 |
| <b>Randomisation:</b>            |         |                                                                                                                                                                                             |                     |
| Sequence generation              | 8a      | Method used to generate the random allocation sequence                                                                                                                                      | In protocol         |
|                                  | 8b      | Type of randomisation; details of any restriction (such as blocking and block size)                                                                                                         | In protocol         |
| Allocation concealment mechanism | 9       | Mechanism used to implement the random allocation sequence (such as sequentially numbered containers), describing any steps taken to conceal the sequence until interventions were assigned | In protocol         |
| Implementation                   | 10      | Who generated the random allocation sequence, who enrolled participants, and who assigned participants to interventions                                                                     | In protocol         |

|    |                                                      |     |                                                                                                                                                   |                         |
|----|------------------------------------------------------|-----|---------------------------------------------------------------------------------------------------------------------------------------------------|-------------------------|
| 1  | Blinding                                             | 11a | If done, who was blinded after assignment to interventions (for example, participants, care providers, those assessing outcomes) and how          | n/a                     |
| 2  |                                                      |     |                                                                                                                                                   |                         |
| 3  |                                                      | 11b | If relevant, description of the similarity of interventions                                                                                       | 12,13,14                |
| 4  | Statistical methods                                  | 12a | Statistical methods used to compare groups for primary and secondary outcomes                                                                     | n/a                     |
| 5  |                                                      | 12b | Methods for additional analyses, such as subgroup analyses and adjusted analyses                                                                  | n/a                     |
| 6  |                                                      |     |                                                                                                                                                   |                         |
| 7  | <b>Results</b>                                       |     |                                                                                                                                                   |                         |
| 8  | Participant flow (a diagram is strongly recommended) | 13a | For each group, the numbers of participants who were randomly assigned, received intended treatment, and were analysed for the primary outcome    | n/a                     |
| 9  |                                                      | 13b | For each group, losses and exclusions after randomisation, together with reasons                                                                  | n/a                     |
| 10 | Recruitment                                          | 14a | Dates defining the periods of recruitment and follow-up                                                                                           | n/a                     |
| 11 |                                                      | 14b | Why the trial ended or was stopped                                                                                                                | n/a                     |
| 12 | Baseline data                                        | 15  | A table showing baseline demographic and clinical characteristics for each group                                                                  | 15                      |
| 13 | Numbers analysed                                     | 16  | For each group, number of participants (denominator) included in each analysis and whether the analysis was by original assigned groups           | n/a                     |
| 14 |                                                      |     |                                                                                                                                                   |                         |
| 15 | Outcomes and estimation                              | 17a | For each primary and secondary outcome, results for each group, and the estimated effect size and its precision (such as 95% confidence interval) | n/a                     |
| 16 |                                                      | 17b | For binary outcomes, presentation of both absolute and relative effect sizes is recommended                                                       | n/a                     |
| 17 | Ancillary analyses                                   | 18  | Results of any other analyses performed, including subgroup analyses and adjusted analyses, distinguishing pre-specified from exploratory         | n/a                     |
| 18 |                                                      |     |                                                                                                                                                   |                         |
| 19 | Harms                                                | 19  | All important harms or unintended effects in each group (for specific guidance see CONSORT for harms)                                             | n/a                     |
| 20 |                                                      |     |                                                                                                                                                   |                         |
| 21 | <b>Discussion</b>                                    |     |                                                                                                                                                   |                         |
| 22 | Limitations                                          | 20  | Trial limitations, addressing sources of potential bias, imprecision, and, if relevant, multiplicity of analyses                                  | 17                      |
| 23 | Generalisability                                     | 21  | Generalisability (external validity, applicability) of the trial findings                                                                         | 17                      |
| 24 | Interpretation                                       | 22  | Interpretation consistent with results, balancing benefits and harms, and considering other relevant evidence                                     | n/a                     |
| 25 |                                                      |     |                                                                                                                                                   |                         |
| 26 | <b>Other information</b>                             |     |                                                                                                                                                   |                         |
| 27 | Registration                                         | 23  | Registration number and name of trial registry                                                                                                    | 3                       |
| 28 | Protocol                                             | 24  | Where the full trial protocol can be accessed, if available                                                                                       | Uploaded in scholar one |
| 29 |                                                      |     |                                                                                                                                                   |                         |
| 30 | Funding                                              | 25  | Sources of funding and other support (such as supply of drugs), role of funders                                                                   | 19                      |
| 31 |                                                      |     |                                                                                                                                                   |                         |
| 32 |                                                      |     |                                                                                                                                                   |                         |
| 33 |                                                      |     |                                                                                                                                                   |                         |
| 34 |                                                      |     |                                                                                                                                                   |                         |
| 35 |                                                      |     |                                                                                                                                                   |                         |
| 36 |                                                      |     |                                                                                                                                                   |                         |
| 37 |                                                      |     |                                                                                                                                                   |                         |
| 38 |                                                      |     |                                                                                                                                                   |                         |
| 39 |                                                      |     |                                                                                                                                                   |                         |
| 40 |                                                      |     |                                                                                                                                                   |                         |
| 41 |                                                      |     |                                                                                                                                                   |                         |
| 42 |                                                      |     |                                                                                                                                                   |                         |

1 \*We strongly recommend reading this statement in conjunction with the CONSORT 2010 Explanation and Elaboration for important clarifications on all the items. If relevant, we also  
2 recommend reading CONSORT extensions for cluster randomised trials, non-inferiority and equivalence trials, non-pharmacological treatments, herbal interventions, and pragmatic trials.  
3 Additional extensions are forthcoming: for those and for up to date references relevant to this checklist, see [www.consort-statement.org](http://www.consort-statement.org).  
4  
5  
6  
7  
8  
9  
10  
11  
12  
13  
14  
15  
16  
17  
18  
19  
20  
21  
22  
23  
24  
25  
26  
27  
28  
29  
30  
31  
32  
33  
34  
35  
36  
37  
38  
39  
40  
41  
42

For peer review only

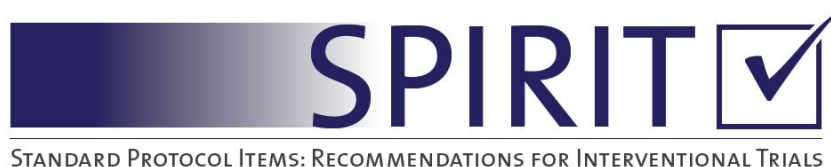

SPIRIT 2013 Checklist: Recommended items to address in a clinical trial protocol and related documents\*

| Section/item                      | Item No | Description                                                                                                                                                                                                                                                                              | Addressed on Page number           |
|-----------------------------------|---------|------------------------------------------------------------------------------------------------------------------------------------------------------------------------------------------------------------------------------------------------------------------------------------------|------------------------------------|
| <b>Administrative information</b> |         |                                                                                                                                                                                                                                                                                          |                                    |
| Title                             | 1       | Descriptive title identifying the study design, population, interventions, and, if applicable, trial acronym                                                                                                                                                                             | 1                                  |
| Trial registration                | 2a      | Trial identifier and registry name. If not yet registered, name of intended registry                                                                                                                                                                                                     | 3                                  |
|                                   | 2b      | All items from the World Health Organization Trial Registration Data Set                                                                                                                                                                                                                 | Yes<br>ClinicalTrials.gov          |
| Protocol version                  | 3       | Date and version identifier                                                                                                                                                                                                                                                              | Available at<br>ClinicalTrials.gov |
| Funding                           | 4       | Sources and types of financial, material, and other support                                                                                                                                                                                                                              | 4                                  |
| Roles and responsibilities        | 5a      | Names, affiliations, and roles of protocol contributors                                                                                                                                                                                                                                  | 1 & 19                             |
|                                   | 5b      | Name and contact information for the trial sponsor                                                                                                                                                                                                                                       | 1                                  |
|                                   | 5c      | Role of study sponsor and funders, if any, in study design; collection, management, analysis, and interpretation of data; writing of the report; and the decision to submit the report for publication, including whether they will have ultimate authority over any of these activities | 1 & 19, 20                         |
|                                   | 5d      | Composition, roles, and responsibilities of the coordinating centre, steering committee, endpoint adjudication committee, data management team, and other individuals or groups overseeing the trial, if applicable (see Item 21a for data monitoring committee)                         | 1, 19, 20<br>& ClinicalTrials.gov  |
| <b>Introduction</b>               |         |                                                                                                                                                                                                                                                                                          |                                    |
| Background and rationale          | 6a      | Description of research question and justification for undertaking the trial, including summary of relevant studies (published and unpublished) examining benefits and harms for each intervention                                                                                       | 5 - 9                              |
|                                   | 6b      | Explanation for choice of comparators                                                                                                                                                                                                                                                    | 9                                  |

|    |                                                           |     |                                                              |              |
|----|-----------------------------------------------------------|-----|--------------------------------------------------------------|--------------|
| 1  |                                                           |     |                                                              |              |
| 2  | Objectives                                                | 7   | Specific objectives or hypotheses                            | 9            |
| 3  |                                                           |     |                                                              |              |
| 4  | Trial design                                              | 8   | Description of trial design including type of trial (eg,     | 9            |
| 5  |                                                           |     | parallel group, crossover, factorial, single group),         |              |
| 6  |                                                           |     | allocation ratio, and framework (eg, superiority,            |              |
| 7  |                                                           |     | equivalence, noninferiority, exploratory)                    |              |
| 8  |                                                           |     |                                                              |              |
| 9  |                                                           |     |                                                              |              |
| 10 | <b>Methods: Participants, interventions, and outcomes</b> |     |                                                              |              |
| 11 |                                                           |     |                                                              |              |
| 12 | Study setting                                             | 9   | Description of study settings (eg, community clinic,         | 10, 11       |
| 13 |                                                           |     | academic hospital) and list of countries where data will     |              |
| 14 |                                                           |     | be collected. Reference to where list of study sites can     |              |
| 15 |                                                           |     | be obtained                                                  |              |
| 16 |                                                           |     |                                                              |              |
| 17 | Eligibility criteria                                      | 10  | Inclusion and exclusion criteria for participants. If        | 10, 11,      |
| 18 |                                                           |     | applicable, eligibility criteria for study centres and       | Table 1 & 2  |
| 19 |                                                           |     | individuals who will perform the interventions (eg,          |              |
| 20 |                                                           |     | surgeons, psychotherapists)                                  |              |
| 21 |                                                           |     |                                                              |              |
| 22 |                                                           |     |                                                              |              |
| 23 | Interventions                                             | 11a | Interventions for each group with sufficient detail to allow | 10, 12, 13,  |
| 24 |                                                           |     | replication, including how and when they will be             | 14, figure 1 |
| 25 |                                                           |     | administered                                                 | table 3 & 4  |
| 26 |                                                           |     |                                                              |              |
| 27 |                                                           |     |                                                              |              |
| 28 |                                                           | 11b | Criteria for discontinuing or modifying allocated            | 14           |
| 29 |                                                           |     | interventions for a given trial participant (eg, drug dose   |              |
| 30 |                                                           |     | change in response to harms, participant request, or         |              |
| 31 |                                                           |     | improving/worsening disease)                                 |              |
| 32 |                                                           |     |                                                              |              |
| 33 |                                                           |     |                                                              |              |
| 34 |                                                           | 11c | Strategies to improve adherence to intervention              | n/a          |
| 35 |                                                           |     | protocols, and any procedures for monitoring adherence       |              |
| 36 |                                                           |     | (eg, drug tablet return, laboratory tests)                   |              |
| 37 |                                                           |     |                                                              |              |
| 38 |                                                           |     |                                                              |              |
| 39 |                                                           | 11d | Relevant concomitant care and interventions that are         | n/a          |
| 40 |                                                           |     | permitted or prohibited during the trial                     |              |
| 41 | Outcomes                                                  | 12  | Primary, secondary, and other outcomes, including the        | 10           |
| 42 |                                                           |     | specific measurement variable (eg, systolic blood            |              |
| 43 |                                                           |     | pressure), analysis metric (eg, change from baseline,        |              |
| 44 |                                                           |     | final value, time to event), method of aggregation (eg,      |              |
| 45 |                                                           |     | median, proportion), and time point for each outcome.        |              |
| 46 |                                                           |     | Explanation of the clinical relevance of chosen efficacy     |              |
| 47 |                                                           |     | and harm outcomes is strongly recommended                    |              |
| 48 |                                                           |     |                                                              |              |
| 49 |                                                           |     |                                                              |              |
| 50 | Participant                                               | 13  | Time schedule of enrolment, interventions (including any     | 12,          |
| 51 | timeline                                                  |     | run-ins and washouts), assessments, and visits for           | figure 1     |
| 52 |                                                           |     | participants. A schematic diagram is highly                  |              |
| 53 |                                                           |     | recommended (see Figure)                                     |              |
| 54 |                                                           |     |                                                              |              |
| 55 |                                                           |     |                                                              |              |
| 56 |                                                           |     |                                                              |              |
| 57 |                                                           |     |                                                              |              |
| 58 |                                                           |     |                                                              |              |
| 59 |                                                           |     |                                                              |              |
| 60 |                                                           |     |                                                              |              |

|   |             |    |                                                         |     |
|---|-------------|----|---------------------------------------------------------|-----|
| 1 |             |    |                                                         |     |
| 2 | Sample size | 14 | Estimated number of participants needed to achieve      | 12  |
| 3 |             |    | study objectives and how it was determined, including   |     |
| 4 |             |    | clinical and statistical assumptions supporting any     |     |
| 5 |             |    | sample size calculations                                |     |
| 6 |             |    |                                                         |     |
| 7 | Recruitment | 15 | Strategies for achieving adequate participant enrolment | n/a |
| 8 |             |    | to reach target sample size                             |     |
| 9 |             |    |                                                         |     |

### Methods: Assignment of interventions (for controlled trials)

#### Allocation:

|    |                |     |                                                            |                    |
|----|----------------|-----|------------------------------------------------------------|--------------------|
| 14 | Sequence       | 16a | Method of generating the allocation sequence (eg,          | In protocol        |
| 15 | generation     |     | computer-generated random numbers), and list of any        | Available at       |
| 16 |                |     | factors for stratification. To reduce predictability of a  | ClinicalTrials.gov |
| 17 |                |     | random sequence, details of any planned restriction (eg,   |                    |
| 18 |                |     | blocking) should be provided in a separate document that   |                    |
| 19 |                |     | is unavailable to those who enrol participants or assign   |                    |
| 20 |                |     | interventions                                              |                    |
| 21 |                |     |                                                            |                    |
| 22 |                |     |                                                            |                    |
| 23 |                |     |                                                            |                    |
| 24 | Allocation     | 16b | Mechanism of implementing the allocation sequence (eg,     | In protocol        |
| 25 | concealment    |     | central telephone; sequentially numbered, opaque,          | Available at       |
| 26 | mechanism      |     | sealed envelopes), describing any steps to conceal the     | ClinicalTrials.gov |
| 27 |                |     | sequence until interventions are assigned                  |                    |
| 28 |                |     |                                                            |                    |
| 29 |                |     |                                                            |                    |
| 30 | Implementation | 16c | Who will generate the allocation sequence, who will enrol  | In protocol        |
| 31 |                |     | participants, and who will assign participants to          | Available at       |
| 32 |                |     | interventions                                              | ClinicalTrials.gov |
| 33 |                |     |                                                            |                    |
| 34 | Blinding       | 17a | Who will be blinded after assignment to interventions (eg, | In protocol        |
| 35 | (masking)      |     | trial participants, care providers, outcome assessors,     | Available at       |
| 36 |                |     | data analysts), and how                                    | ClinicalTrials.gov |
| 37 |                |     |                                                            |                    |
| 38 |                |     |                                                            |                    |
| 39 |                | 17b | If blinded, circumstances under which unblinding is        | n/a                |
| 40 |                |     | permissible, and procedure for revealing a participant's   |                    |
| 41 |                |     | allocated intervention during the trial                    |                    |
| 42 |                |     |                                                            |                    |

### Methods: Data collection, management, and analysis

|    |                 |     |                                                             |        |
|----|-----------------|-----|-------------------------------------------------------------|--------|
| 45 | Data collection | 18a | Plans for assessment and collection of outcome,             | 12, 13 |
| 46 | methods         |     | baseline, and other trial data, including any related       |        |
| 47 |                 |     | processes to promote data quality (eg, duplicate            |        |
| 48 |                 |     | measurements, training of assessors) and a description      |        |
| 49 |                 |     | of study instruments (eg, questionnaires, laboratory        |        |
| 50 |                 |     | tests) along with their reliability and validity, if known. |        |
| 51 |                 |     | Reference to where data collection forms can be found, if   |        |
| 52 |                 |     | not in the protocol                                         |        |
| 53 |                 |     |                                                             |        |
| 54 |                 |     |                                                             |        |
| 55 |                 |     |                                                             |        |
| 56 |                 | 18b | Plans to promote participant retention and complete         | 13     |
| 57 |                 |     | follow-up, including list of any outcome data to be         |        |
| 58 |                 |     | collected for participants who discontinue or deviate from  |        |
| 59 |                 |     | intervention protocols                                      |        |
| 60 |                 |     |                                                             |        |

|    |                                 |     |                                                             |                    |
|----|---------------------------------|-----|-------------------------------------------------------------|--------------------|
| 1  |                                 |     |                                                             |                    |
| 2  | Data                            | 19  | Plans for data entry, coding, security, and storage,        | In protocol        |
| 3  | management                      |     | including any related processes to promote data quality     | Available at       |
| 4  |                                 |     | (eg, double data entry; range checks for data values).      | ClinicalTrials.gov |
| 5  |                                 |     | Reference to where details of data management               |                    |
| 6  |                                 |     | procedures can be found, if not in the protocol             |                    |
| 7  |                                 |     |                                                             |                    |
| 8  |                                 |     |                                                             |                    |
| 9  | Statistical                     | 20a | Statistical methods for analysing primary and secondary     | In protocol        |
| 10 | methods                         |     | outcomes. Reference to where other details of the           | Available at       |
| 11 |                                 |     | statistical analysis plan can be found, if not in the       | ClinicalTrials.gov |
| 12 |                                 |     | protocol                                                    |                    |
| 13 |                                 |     |                                                             |                    |
| 14 |                                 | 20b | Methods for any additional analyses (eg, subgroup and       | In protocol        |
| 15 |                                 |     | adjusted analyses)                                          | Available at       |
| 16 |                                 |     |                                                             | ClinicalTrials.gov |
| 17 |                                 |     |                                                             |                    |
| 18 |                                 |     |                                                             |                    |
| 19 |                                 | 20c | Definition of analysis population relating to protocol non- | In protocol        |
| 20 |                                 |     | adherence (eg, as randomised analysis), and any             | Available at       |
| 21 |                                 |     | statistical methods to handle missing data (eg, multiple    | ClinicalTrials.gov |
| 22 |                                 |     | imputation)                                                 |                    |
| 23 |                                 |     |                                                             |                    |
| 24 |                                 |     |                                                             |                    |
| 25 | <b>Methods: Monitoring</b>      |     |                                                             |                    |
| 26 | Data monitoring                 | 21a | Composition of data monitoring committee (DMC);             | In protocol        |
| 27 |                                 |     | summary of its role and reporting structure; statement of   | Available at       |
| 28 |                                 |     | whether it is independent from the sponsor and              | ClinicalTrials.gov |
| 29 |                                 |     | competing interests; and reference to where further         |                    |
| 30 |                                 |     | details about its charter can be found, if not in the       |                    |
| 31 |                                 |     | protocol. Alternatively, an explanation of why a DMC is     |                    |
| 32 |                                 |     | not needed                                                  |                    |
| 33 |                                 |     |                                                             |                    |
| 34 |                                 |     |                                                             |                    |
| 35 |                                 |     |                                                             |                    |
| 36 |                                 | 21b | Description of any interim analyses and stopping            | In protocol        |
| 37 |                                 |     | guidelines, including who will have access to these         | Available at       |
| 38 |                                 |     | interim results and make the final decision to terminate    | ClinicalTrials.gov |
| 39 |                                 |     | the trial                                                   |                    |
| 40 |                                 |     |                                                             |                    |
| 41 | Harms                           | 22  | Plans for collecting, assessing, reporting, and managing    | In protocol        |
| 42 |                                 |     | solicited and spontaneously reported adverse events and     | Available at       |
| 43 |                                 |     | other unintended effects of trial interventions or trial    | ClinicalTrials.gov |
| 44 |                                 |     | conduct                                                     |                    |
| 45 |                                 |     |                                                             |                    |
| 46 |                                 |     |                                                             |                    |
| 47 | Auditing                        | 23  | Frequency and procedures for auditing trial conduct, if     | n/a                |
| 48 |                                 |     | any, and whether the process will be independent from       |                    |
| 49 |                                 |     | investigators and the sponsor                               |                    |
| 50 |                                 |     |                                                             |                    |
| 51 |                                 |     |                                                             |                    |
| 52 | <b>Ethics and dissemination</b> |     |                                                             |                    |
| 53 |                                 |     |                                                             |                    |
| 54 | Research ethics                 | 24  | Plans for seeking research ethics committee/institutional   | 2 & 9              |
| 55 | approval                        |     | review board (REC/IRB) approval                             |                    |
| 56 |                                 |     |                                                             |                    |
| 57 |                                 |     |                                                             |                    |
| 58 |                                 |     |                                                             |                    |
| 59 |                                 |     |                                                             |                    |
| 60 |                                 |     |                                                             |                    |

|    |                   |     |                                                                |                    |
|----|-------------------|-----|----------------------------------------------------------------|--------------------|
| 1  |                   |     |                                                                |                    |
| 2  | Protocol          | 25  | Plans for communicating important protocol modifications       | In protocol        |
| 3  | amendments        |     | (eg, changes to eligibility criteria, outcomes, analyses) to   | Available at       |
| 4  |                   |     | relevant parties (eg, investigators, REC/IRBs, trial           | ClinicalTrials.gov |
| 5  |                   |     | participants, trial registries, journals, regulators)          |                    |
| 6  |                   |     |                                                                |                    |
| 7  | Consent or assent | 26a | Who will obtain informed consent or assent from potential      | In protocol        |
| 8  |                   |     | trial participants or authorised surrogates, and how (see      | Available at       |
| 9  |                   |     | Item 32)                                                       | ClinicalTrials.gov |
| 10 |                   |     |                                                                |                    |
| 11 |                   |     |                                                                |                    |
| 12 |                   | 26b | Additional consent provisions for collection and use of        | n/a                |
| 13 |                   |     | participant data and biological specimens in ancillary         |                    |
| 14 |                   |     | studies, if applicable                                         |                    |
| 15 |                   |     |                                                                |                    |
| 16 | Confidentiality   | 27  | How personal information about potential and enrolled          | In protocol        |
| 17 |                   |     | participants will be collected, shared, and maintained in      | Available at       |
| 18 |                   |     | order to protect confidentiality before, during, and after     | ClinicalTrials.gov |
| 19 |                   |     | the trial                                                      |                    |
| 20 |                   |     |                                                                |                    |
| 21 |                   |     |                                                                |                    |
| 22 | Declaration of    | 28  | Financial and other competing interests for principal          | 20                 |
| 23 | interests         |     | investigators for the overall trial and each study site        |                    |
| 24 |                   |     |                                                                |                    |
| 25 | Access to data    | 29  | Statement of who will have access to the final trial           | In protocol        |
| 26 |                   |     | dataset, and disclosure of contractual agreements that         | Available at       |
| 27 |                   |     | limit such access for investigators                            | ClinicalTrials.gov |
| 28 |                   |     |                                                                |                    |
| 29 |                   |     |                                                                |                    |
| 30 | Ancillary and     | 30  | Provisions, if any, for ancillary and post-trial care, and for | n/a                |
| 31 | post-trial care   |     | compensation to those who suffer harm from trial               |                    |
| 32 |                   |     | participation                                                  |                    |
| 33 |                   |     |                                                                |                    |
| 34 | Dissemination     | 31a | Plans for investigators and sponsor to communicate trial       | 3, 15, 16          |
| 35 | policy            |     | results to participants, healthcare professionals, the         |                    |
| 36 |                   |     | public, and other relevant groups (eg, via publication,        |                    |
| 37 |                   |     | reporting in results databases, or other data sharing          |                    |
| 38 |                   |     | arrangements), including any publication restrictions          |                    |
| 39 |                   |     |                                                                |                    |
| 40 |                   |     |                                                                |                    |
| 41 |                   | 31b | Authorship eligibility guidelines and any intended use of      | In protocol        |
| 42 |                   |     | professional writers                                           | Available at       |
| 43 |                   |     |                                                                | ClinicalTrials.gov |
| 44 |                   |     |                                                                |                    |
| 45 |                   |     |                                                                |                    |
| 46 |                   | 31c | Plans, if any, for granting public access to the full          | In protocol        |
| 47 |                   |     | protocol, participant-level dataset, and statistical code      | Available at       |
| 48 |                   |     |                                                                | ClinicalTrials.gov |
| 49 |                   |     |                                                                |                    |
| 50 | <b>Appendices</b> |     |                                                                |                    |
| 51 |                   |     |                                                                |                    |
| 52 | Informed consent  | 32  | Model consent form and other related documentation             | In protocol        |
| 53 | materials         |     | given to participants and authorised surrogates                | Available at       |
| 54 |                   |     |                                                                | ClinicalTrials.gov |
| 55 |                   |     |                                                                |                    |
| 56 |                   |     |                                                                |                    |
| 57 |                   |     |                                                                |                    |
| 58 |                   |     |                                                                |                    |
| 59 |                   |     |                                                                |                    |
| 60 |                   |     |                                                                |                    |



|   |            |    |                                                               |                    |
|---|------------|----|---------------------------------------------------------------|--------------------|
| 1 |            |    |                                                               |                    |
| 2 | Biological | 33 | Plans for collection, laboratory evaluation, and storage of   | In protocol        |
| 3 | specimens  |    | biological specimens for genetic or molecular analysis in     | Available at       |
| 4 |            |    | the current trial and for future use in ancillary studies, if | ClinicalTrials.gov |
| 5 |            |    | applicable                                                    |                    |
| 6 |            |    |                                                               |                    |

7 \*It is strongly recommended that this checklist be read in conjunction with the SPIRIT 2013  
8 Explanation & Elaboration for important clarification on the items. Amendments to the  
9 protocol should be tracked and dated. The SPIRIT checklist is copyrighted by the SPIRIT  
10 Group under the Creative Commons "[Attribution-NonCommercial-NoDerivs 3.0 Unported](#)"  
11 license.  
12  
13  
14  
15  
16  
17  
18  
19  
20  
21  
22  
23  
24  
25  
26  
27  
28  
29  
30  
31  
32  
33  
34  
35  
36  
37  
38  
39  
40  
41  
42  
43  
44  
45  
46  
47  
48  
49  
50  
51  
52  
53  
54  
55  
56  
57  
58  
59  
60

For peer review only

# BMJ Open

## PCASTt/SPCG-17 – A randomised trial of active surveillance in prostate cancer: rationale and design

|                                 |                                                                                                                                                                                                                                                                                                                                                                                                                                                                                                                                                                                                                                                                                                                                                                                                                                                                                                                                                                                                                                                                                                                                                                                                                                                                                                                                                                                                                                                                                                                                                                                                                                                                                                                                                               |
|---------------------------------|---------------------------------------------------------------------------------------------------------------------------------------------------------------------------------------------------------------------------------------------------------------------------------------------------------------------------------------------------------------------------------------------------------------------------------------------------------------------------------------------------------------------------------------------------------------------------------------------------------------------------------------------------------------------------------------------------------------------------------------------------------------------------------------------------------------------------------------------------------------------------------------------------------------------------------------------------------------------------------------------------------------------------------------------------------------------------------------------------------------------------------------------------------------------------------------------------------------------------------------------------------------------------------------------------------------------------------------------------------------------------------------------------------------------------------------------------------------------------------------------------------------------------------------------------------------------------------------------------------------------------------------------------------------------------------------------------------------------------------------------------------------|
| Journal:                        | <i>BMJ Open</i>                                                                                                                                                                                                                                                                                                                                                                                                                                                                                                                                                                                                                                                                                                                                                                                                                                                                                                                                                                                                                                                                                                                                                                                                                                                                                                                                                                                                                                                                                                                                                                                                                                                                                                                                               |
| Manuscript ID                   | bmjopen-2018-027860.R2                                                                                                                                                                                                                                                                                                                                                                                                                                                                                                                                                                                                                                                                                                                                                                                                                                                                                                                                                                                                                                                                                                                                                                                                                                                                                                                                                                                                                                                                                                                                                                                                                                                                                                                                        |
| Article Type:                   | Protocol                                                                                                                                                                                                                                                                                                                                                                                                                                                                                                                                                                                                                                                                                                                                                                                                                                                                                                                                                                                                                                                                                                                                                                                                                                                                                                                                                                                                                                                                                                                                                                                                                                                                                                                                                      |
| Date Submitted by the Author:   | 22-Jun-2019                                                                                                                                                                                                                                                                                                                                                                                                                                                                                                                                                                                                                                                                                                                                                                                                                                                                                                                                                                                                                                                                                                                                                                                                                                                                                                                                                                                                                                                                                                                                                                                                                                                                                                                                                   |
| Complete List of Authors:       | Ahlberg, Mats; Uppsala Universitet Institutionen for kirurgiska vetenskaper<br>Adami, Hans-Olov; Karolinska Institutet Department of Medical Epidemiology and Biostatistics; Harvard University T H Chan School of Public Health, Department of Epidemiology<br>Beckmann, Kerri; King's College London Translational Oncology and Urology Research; University of Southern Australia Centre for Population Health Research<br>Bertilsson, Helena; Sankt Olavs Hospital Universitetssykehuset i Trondheim, Department of Urology; NTNU - Norwegian University of Science and Technology, Faculty of Medicine and Health Sciences<br>Bratt, Ola; Goteborgs universitet Sahlgrenska Akademin, Department of Urology<br>Cahill, Declan; The Royal Marsden Hospital, London<br>Egevad, Lars; Karolinska Universitetssjukhuset, Department of Pathology<br>Garmo, Hans; King's College London, School of Cancer & Pharmaceutical Sciences; Regional Cancer Centre Uppsala/Örebro<br>Holmberg, Lars; Kings College London School of Medicine, Division of Cancer Studies; Regional Cancer Centre Uppsala/Örebro<br>Johansson, Eva; Uppsala Universitet Institutionen för kirurgiska vetenskaper<br>Rannikko, Antti; Helsinki University and Helsinki University Hospital<br>Van Hemelrijck, Mieke; Kings College London, Translational Oncology & Urology Offices<br>Jäderling, Fredrik; Karolinska Universitetssjukhuset, Radiology Department; Karolinska Institutet Department of Molecular Medicine and Surgery<br>Wassberg, Cecilia; Karolinska Universitetssjukhuset, Radiology Department<br>Åberg, Ulrika; Uppsala Universitet Institutionen for kirurgiska vetenskaper<br>Bill-Axelsson, Anna; Uppsala Universitet Institutionen for kirurgiska vetenskaper |
| <b>Primary Subject Heading</b>: | Urology                                                                                                                                                                                                                                                                                                                                                                                                                                                                                                                                                                                                                                                                                                                                                                                                                                                                                                                                                                                                                                                                                                                                                                                                                                                                                                                                                                                                                                                                                                                                                                                                                                                                                                                                                       |
| Secondary Subject Heading:      | Urology                                                                                                                                                                                                                                                                                                                                                                                                                                                                                                                                                                                                                                                                                                                                                                                                                                                                                                                                                                                                                                                                                                                                                                                                                                                                                                                                                                                                                                                                                                                                                                                                                                                                                                                                                       |
| Keywords:                       | Active surveillance, MRI, Prostate cancer, Randomised trial                                                                                                                                                                                                                                                                                                                                                                                                                                                                                                                                                                                                                                                                                                                                                                                                                                                                                                                                                                                                                                                                                                                                                                                                                                                                                                                                                                                                                                                                                                                                                                                                                                                                                                   |

1  
2  
3  
4  
5  
6  
7  
8  
9  
10  
11  
12  
13  
14  
15  
16  
17  
18  
19  
20  
21  
22  
23  
24  
25  
26  
27  
28  
29  
30  
31  
32  
33  
34  
35  
36  
37  
38  
39  
40  
41  
42  
43  
44  
45  
46  
47  
48  
49  
50  
51  
52  
53  
54  
55  
56  
57  
58  
59  
60



SCHOLARONE™  
Manuscripts

# PCASTt/SPCG-17 – A randomised trial of active surveillance in prostate cancer: rationale and design

Mats S. Ahlberg<sup>a</sup>, Hans-Olov Adami<sup>b,c,d</sup>, Kerri Beckmann<sup>e,f</sup>, Helena Bertilsson<sup>g,h</sup>, Ola Bratt<sup>i</sup>, Declan Cahill<sup>j</sup>, Lars Egevad<sup>k</sup>, Hans Garmo<sup>l,m</sup>, Lars Holmberg<sup>a,n</sup>, Eva Johansson<sup>a</sup>, Antti Rannikko<sup>o</sup>, Mieke Van Hemelrijck<sup>p</sup>, Fredrik Jäderling<sup>q,r</sup>, Cecilia Wassberg<sup>q</sup>, Ulrika WN. Åberg<sup>a</sup>, Anna Bill-Axelsson<sup>a</sup> for the SPCG-17 study group

<sup>a</sup>Department of surgical sciences, Uppsala University, Uppsala, Sweden; <sup>b</sup>Department of Medical Epidemiology and Biostatistics, Karolinska Institutet, Stockholm, Sweden; <sup>c</sup>Department of Epidemiology, Harvard T.H. Chan School of Public Health, Boston, MA, USA; <sup>d</sup>Clinical effectiveness Research Group, Institute of Health and Society, University of Oslo, Oslo, Norway; <sup>e</sup>Translational Oncology and Urology Research, King's College, London, UK; <sup>f</sup>Centre for Population Health Research, University of South Australia, Adelaide, Australia; <sup>g</sup>Department of Urology, St Olavs Hospital, Trondheim University Hospital, Trondheim, Norway; <sup>h</sup>Department of Cancer Research and Molecular Medicine, Faculty of Medicine and Health Sciences, NTNU – Norwegian University of Science and Technology, Trondheim, Norway; <sup>i</sup>Department of Urology, Sahlgrenska Academy, University of Gothenburg, Gothenburg, Sweden; <sup>j</sup>The Royal Marsden Hospital, London, UK; <sup>k</sup>Department of pathology, Karolinska University Hospital, Stockholm, Sweden; <sup>l</sup>Regional Cancer Centre Uppsala Örebro Region, Uppsala, Sweden; <sup>m</sup>Comprehensive Cancer Centre, School of Cancer & Pharmaceutical Sciences, Faculty of Life Sciences & Medicine, King's College London, London, UK; <sup>n</sup>King's College London, Faculty of Life sciences and Medicine, London, UK; <sup>o</sup>Helsinki University and Helsinki University Hospital, Helsinki, Finland; <sup>p</sup>Department of Cancer Epidemiology and Population Health, King's College London, London, UK; <sup>q</sup>Department of Radiology, Karolinska University Hospital, Stockholm, Sweden; <sup>r</sup>Department of Molecular Medicine and Surgery, Karolinska Institutet, Stockholm, Sweden;

Corresponding author: Mats S. Ahlberg

Mailing address: Urologiska kliniken; Akademiska sjukhuset ing. 70 1 tr; 75185 Uppsala; Sweden

Telephone number: +46 70 207 29 11

Fax Number: +46 18 55 91 59

E-mail address: [mats.ahlberg@surgsci.uu.se](mailto:mats.ahlberg@surgsci.uu.se)

Keywords Active surveillance; MRI; prostate cancer; randomised trial

SPCG-17 study group:

## Sweden:

Göteborg: Johan Stranne, Jonas Wallström

Uppsala: Eva Johansson, Pär Dahlman

Umeå: Bengt Friedrich, Conny Ström

Luleå/Sunderby: Periklis Koumoutsakos, Annika Larsson

Sundsvall: Mattias Tell, Magnus Alm

Linköping/Norrköping: Jon Forsberg, Aus Saudi

Örebro: Ove Andrén, Wolfgang Krauss

## Finland:

Helsinki: Antti Rannikko, Hanna Vasarainen, Anu Kenttämies

## Norway:

Trondheim: Helena Bertilsson, Sverre Langørgen

## Abstract

### Introduction:

Overtreatment of localised prostate cancer is substantial despite increased use of active surveillance. No randomised trials help define how to monitor patients or when to initiate treatment with curative intent.

### Methods and analysis:

A randomised, multicentre, intervention trial designed to evaluate the safety of an MRI-based active surveillance protocol, with standardised triggers for repeated biopsies and radical treatment, with the aim to reduce overtreatment of prostate cancer. 2000 men will be randomly allocated to either surveillance according to current practice or to standardised triggers at centers in Sweden, Norway, Finland and the United Kingdom. Men diagnosed the past 12 months with prostate cancer,  $\leq$ T2a, prostate specific antigen (PSA)  $<15$  ng/ml, PSA density  $\leq 0.2$  ng/ml/cc, any International Society of Urological Pathology (ISUP) Grade Group 1 are eligible. Men with ISUP Grade Group 2 in  $<30$  % of cores on systematic biopsy and  $<10$  mm cancer in one core on systematic or targeted biopsy are also eligible. Men diagnosed on systematic biopsy should have an MRI and targeted biopsies against Prostate Imaging and Reporting Data System version 2 (PI-RADS) 3-5 lesions before inclusion. Identical follow-up in the two study arms: bi-annual PSA-testing, yearly clinical examination and MRI every second year. In the experimental arm, standardised triggers based on MRI and PSA density elicit repeated biopsies. MRI and histopathological progression trigger radical treatment. Primary outcome measure is progression-free survival. Secondary outcome measures are cumulative incidence of metastatic disease, treatments with curative intent, pT3-4 at radical prostatectomy, switch to watchful waiting, prostate cancer mortality and quality of life. Inclusion started in October 2016 and in October 2018; 275 patients have been enrolled.

**Ethics and dissemination:**

Ethical approval was obtained in each participating country. Results for the primary and secondary outcome measures will be submitted for publication in peer-reviewed journals.

**Trial ID:**

SPCG-17; NCT02914873.

For peer review only

## Article summary

### *Strengths and limitations of this study*

- The randomised design reduces chances of observed outcome being influenced by confounding factors.
- The trial size will allow quantifying clinically relevant endpoints with reasonable statistical precision.
- International multicentre study making results more generalisable.
- Limitations include long follow-up that has to be undertaken to assess tumour progression.

## Introduction

Following the introduction of PSA testing in the late 1980s, the incidence of prostate cancer increased dramatically in many countries <sup>1</sup>. Widespread PSA testing led to a downward stage migration, with a growing proportion of small and well differentiated cancers with low malignant potential even if left untreated <sup>2</sup>.

Although overdiagnosis of prostate cancers has been documented on a group level <sup>2</sup>, currently it is not possible to know if an individual man with prostate cancer will experience progression to lethal disease or not. As a consequence, many men unnecessarily undergo radical treatment. To reduce overtreatment and its side effects, without jeopardizing the potential benefit of radical treatment, active surveillance with selective, delayed therapy with curative intent was developed in the late 1990s <sup>3</sup>.

In active surveillance, treatment with curative intent is initiated when and if investigations indicate progressive cancer. In watchful waiting only palliative treatment is initiated at symptoms. Several national guidelines recommend active surveillance for most low-risk cancers and selected favourable intermediate-risk cancers <sup>4</sup>. Different criteria are used to trigger radical treatment, but many patients are treated with curative intent without objective signs of disease progression <sup>5</sup>. Although multiple active surveillance cohorts show low rates of disease progression <sup>6</sup>, no randomised trials help define which patients are suitable for active surveillance, how to monitor them or when to initiate treatment with curative intent. To fill some of these evidence gaps and reduce both over- and undertreatment, the Scandinavian Prostate Cancer Group (SPCG) is promoting a multinational randomised trial, Prostate Cancer Active Surveillance Trigger trial (PCASTt/SPCG-17), in which standardised triggers for repeat biopsies and initiation of treatment with curative intent, is compared with current



1  
2  
3 clinical practice for active surveillance of low-risk and favourable intermediate-risk prostate  
4  
5 cancer.  
6  
7  
8  
9

## 10 **Areas of uncertainty**

### 11 *Active Surveillance or immediate treatment with curative intent*

12  
13  
14 None of three randomised trials has shown substantial survival benefit of radical treatment  
15  
16 compared with watchful waiting or active monitoring in men with low-risk PCa<sup>7-9</sup>. The  
17  
18 SPCG-4 trial began in 1989, i.e. before the PSA era, and included primarily men with  
19  
20 palpable tumours. In this trial, radical prostatectomy resulted in a 3.8% (95% CI, -4,6 to 12,2)  
21  
22 lower prostate cancer mortality in men with low-risk cancer, compared with watchful waiting,  
23  
24 after 18 years of follow-up<sup>7</sup>. In the PIVOT trial, including predominantly men with PSA  
25  
26 detected localised cancer, there was a 4% absolute reduction of prostate cancer specific  
27  
28 mortality (95% CI, -0,2 to 8,3) after radical prostatectomy, compared with observation, after  
29  
30 nearly 20 years of follow-up. Events were few in the subgroup analysis, ensuing low  
31  
32 statistical precision<sup>8</sup>. In ProtecT, only men with PSA-detected tumours were included. After  
33  
34 ten years of follow-up, prostate cancer specific survival was similar in the three treatment  
35  
36 groups: 98.8% (95% CI, 98.4-99.5) after initial active monitoring, 99.0% (95% CI, 97.2-99.6)  
37  
38 in men allocated to radical prostatectomy and 99.6% (95% CI, 98.4-99.9) in men allocated to  
39  
40 radiotherapy, but progression to metastatic disease was less common after treatment with  
41  
42 curative intent<sup>9</sup>.  
43  
44  
45  
46  
47  
48  
49  
50

### 51 *Criteria for active surveillance*

52  
53 Most published active surveillance protocols include men with low-risk disease (ISUP grade 1  
54  
55 (Gleason score 3+3=6), T1c-T2a and PSA < 10 ng/ml), but some include intermediate-risk  
56  
57 disease (ISUP grade 2 (Gleason score 3+4=7), T1c-T2 and PSA 10-20 ng/ml)<sup>6</sup>. ProtecT, the  
58  
59  
60

1  
2  
3 only randomised trial addressing the question of active monitoring vs curative treatment,  
4 included all localised risk-groups but predominantly low risk. They found a higher risk of  
5 progression to metastases with active monitoring compared to radical treatment, after ten  
6 years<sup>9</sup>. However, active monitoring in their protocol consisted of repeated PSA-testing but  
7 apart from that was not specifically regulated.  
8  
9  
10  
11  
12  
13  
14  
15  
16

### 17 *Follow-up during active surveillance*

18  
19 Active surveillance protocols differ, but they typically include repeated digital rectal  
20 examinations, PSA testing and systematic, transrectal biopsies. Interpretation of digital rectal  
21 examination is subjective and cannot detect tumours in the anterior part of the prostate, which  
22 limit its usefulness<sup>10</sup>. PSA values fluctuate over time<sup>11</sup>, and raising values may reflect  
23 inflammation or progression of benign hyperplasia, rather than tumour progression.  
24 Systematic biopsies can easily miss small multifocal cancers and large tumours in the anterior  
25 prostate. Histopathological evaluation of the specimen shows considerable inter-individual  
26 variation between pathologists<sup>12</sup>.  
27  
28  
29  
30  
31  
32  
33  
34  
35  
36  
37  
38  
39

### 40 *Repeated biopsy and conversion to radical treatment*

41  
42 In Sweden, 30-40% of men managed by active surveillance receive treatment with curative  
43 intent within five years after diagnosis<sup>13</sup>. In a nationwide study, active surveillance was  
44 discontinued because of “patient preference” in 20%, by PSA progression in 52% and by  
45 biopsy progression in 24% of the men<sup>13</sup>. In the PRIAS study, about half of the men switched  
46 to curative treatment within 2.3 years<sup>14</sup>. Worry about whether the patient has an undetected  
47 high-risk cancer, without objective signs of progression or high-risk cancer, may entail  
48 unnecessary repeated biopsies and treatment to accommodate the clinicians’ and the patients’  
49 concerns. Conversely, digital rectal examination, PSA and systematic biopsies have low  
50  
51  
52  
53  
54  
55  
56  
57  
58  
59  
60

1  
2  
3 sensitivity to detect high-grade cancer <sup>10-12</sup>. Hence, we don't know when repeated biopsies are  
4  
5 required and when radical treatment is beneficial.  
6  
7  
8  
9

### 10 *Magnetic resonance imaging*

11  
12 The use of MRI in the assessment of prostate cancer has increased. There is high level  
13  
14 evidence that MRI has the ability to detect prostate cancer <sup>15,16</sup>, but there is insufficient  
15  
16 evidence on the benefit of repeated MRI during active surveillance <sup>17</sup>. According to the  
17  
18 PROMIS study, MRI may reduce the proportion of men undergoing a prostate biopsy by one  
19  
20 fourth, and the proportion of men diagnosed with clinically insignificant cancer by five  
21  
22 percent, at the cost of delaying the diagnosis of a clinically significant cancer (defined as  
23  
24 presence of any ISUP grade  $\geq 3$  (Gleason score  $4+3=7$ ) or a maximum cancer core length  
25  
26 involvement of 6 mm or more in any location) in three percent of the men <sup>18</sup>. The negative  
27  
28 predictive value of an unsuspecting MRI finding is high, and even higher when PSA density is  
29  
30 low <sup>19</sup>.  
31  
32  
33  
34  
35  
36  
37

38 The randomised PRECISION trial indicates that MRI with targeted biopsies has higher  
39  
40 detection rate than systematic biopsies for ISUP grade  $\geq 2$  prostate cancer and reduces the  
41  
42 detection of ISUP grade 1 cancer in biopsy naïve patients with clinical suspicion of prostate  
43  
44 cancer <sup>20</sup>. In a retrospective review of repeated biopsies during active surveillance, MRI with  
45  
46 targeted biopsies nearly doubled the detection of pathological progression compared to  
47  
48 systematic biopsies <sup>21</sup>. This is however questioned by a recent prospective trial that showed  
49  
50 no increase in up-grading with additional targeted biopsies vs systematic biopsies alone <sup>22</sup>.  
51  
52  
53  
54  
55  
56  
57  
58  
59  
60

### *Active surveillance in intermediate-risk prostate cancer*

The risk of cancer progression during active surveillance of patients with low-risk prostate cancer is low, but varies between studies, probably because of different inclusion criteria and indications for therapeutic intervention<sup>6</sup>. Active surveillance of intermediate-risk prostate cancer is debated, but it is supported by some data<sup>23</sup>. The Sunnybrook cohort - including men with low-risk and favourable intermediate-risk prostate cancer - showed a 2.8% progression to metastatic disease and 1.5% prostate cancer specific mortality within 15 years<sup>24</sup>, with a more favourable outcome for men with low-risk cancer<sup>25</sup>. Eligibility was not influenced by PSA density or number of positive cores, and MRI was not used. Based on findings that MRI with targeted biopsies has a higher detection rate than standard biopsies for ISUP grade  $\geq 2$  prostate cancer<sup>20</sup> one must assume that many intermediate and high-risk tumours were undetected in this cohort. Despite this, the long-term cancer specific survival was high.

### **The PCASTt/ SPCG-17 trial**

#### *Study design*

PCASTt/SPCG-17 is a multinational randomised trial comparing active surveillance using standardised triggers for repeated biopsy and radical treatment with current practice. The hypothesis is that standardised triggers will reduce overtreatment and adverse events and improve quality of life, without increasing disease progression or prostate cancer mortality.

#### *Outcome measures*

The primary endpoint is progression-free survival. Progression is defined as biochemical recurrence after treatment with curative intent or start of androgen deprivation therapy in previously untreated men. Following radical prostatectomy, biochemical recurrence is defined as two consecutive rising PSA values  $>0.2$  ng/ml. After primary radiation therapy and

1  
2  
3 radiation therapy with androgen deprivation therapy, the definition of biochemical recurrence  
4 is any PSA increase 2 ng/ml higher than the PSA nadir value, regardless of the serum  
5 concentration of the nadir<sup>26</sup>. Secondary endpoints are the cumulative incidence of pT3  
6 tumours, distant metastasis, treatment with curative intent and switch to watchful waiting.  
7 Prostate cancer death is the final endpoint at ten years. Quality-of-life endpoints will be  
8 analysed separately.  
9  
10  
11  
12  
13  
14  
15  
16  
17  
18

### 19 *Participants & participating centres*

20  
21 Eligible for inclusion are men with histopathological low-risk or favourable intermediate-risk  
22 adenocarcinoma of the prostate diagnosed within 12 months, who have not received any  
23 treatment and have at least ten years' expected lifetime. All men primarily diagnosed with  
24 prostate cancer from systematic biopsies should undergo MRI with biopsies targeted at PI-  
25 RADS 3-5 lesions before inclusion. For men primarily diagnosed with prostate cancer  
26 following MRI with targeted biopsies, subsequent systematic biopsies are optional. Inclusion  
27 criteria are listed in table 1. Centres in Sweden, Finland, Norway and UK will participate.  
28 Demands on participating centres are listed in table 2.  
29  
30  
31  
32  
33  
34  
35  
36  
37  
38  
39  
40  
41  
42  
43  
44  
45  
46  
47  
48  
49  
50  
51  
52  
53  
54  
55  
56  
57  
58  
59  
60

**Table 1 – inclusion criteria**

- Adenocarcinoma of the prostate diagnosed within the past 12 months
- Tumour stage  $\leq$ T2a, NX, M0
- PSA  $<$ 15 ng/ml and PSA density  $\leq$ 0.2 ng/ml/cc
- Systematic biopsies with  $\geq$ 10 cores (optional, if the diagnosis is based on MRI with targeted biopsies)
- MRI with targeted biopsies towards PI-RADS 3, 4 and 5 (according to PI-RADS v. 2)
- ISUP grade 1 (any number of cores, any involvement)
- ISUP grade 2 in  $<$ 3 cores (or  $<$ 30% of cores if  $>$ 10 systematic cores were taken) and  $<$ 10 mm cancer in one core (systematic or targeted)
- Life expectancy  $\geq$ 10 years (no upper age limit)
- Candidate for curative treatment (surgery or radiotherapy) if progression occurs
- Signed written informed consent

PSA=Prostate Specific Antigen, MRI=Magnetic Resonance Imaging, PI-RADS=Prostate Imaging Reporting and Data System, ISUP = International Society of Urological Pathology

**Table 2 – demands on participating centres**

- The local organisation should commit to recruiting all consecutive patients who are willing to start on active surveillance and who fulfil the inclusion criteria
- A 1.5 or 3 Tesla MRI
- Access to prostate MRI expertise. If the local competence is uncertain, the national PI will organise external expertise for MRI evaluation
- The MRI should follow European Society of Urogenital Radiology (ESUR) guidelines and include:
  - T1- and T2-weighted images
  - Diffusion-weighted images (DWI) including Apparent Diffusion Coefficient (ADC)
  - Dynamic contrast enhanced (DCE) imaging and Magnetic Resonance Spectroscopy Imaging (MRSI) are optional

- The MR images should be reported according to PI-RADS v. 2

MRI=Magnetic Resonance Imaging, PI-RADS=Prostate Imaging Reporting and Data System  
PCASTt/SPCG-17 aims to randomise 2,000 patients in 4 years, which will give an 85%  
power to detect a 1.3 percentage points progression-free survival difference between the study  
arms (2-sided alpha 0.05) under the assumption that 90% of the patients are managed per  
protocol according to randomisation. The progression-free survival in the current practise  
group five years after randomisation is assumed to be 98%, based on previous studies <sup>24</sup>.

#### *Patient reported outcome measures and follow-up*

At inclusion and every second year during follow-up participants are requested to complete a  
study-specific quality-of-life questionnaire including the Expanded Prostate cancer Index  
Composite (EPIC-26) <sup>27</sup>, for separate quality-of-life analysis.

Basic follow-up is identical in both arms, with biannual PSA testing, annual clinical  
examination and MRI scan every second year (Figure 1). In the current practice arm,  
additional investigations are optional and it is up to the urologist to decide when it is time to  
repeat biopsies and initiate treatment with curative intent. In the experimental arm, follow-up  
is according to schedule, biopsies are only taken if the standardised triggers are reached  
(Table 3) and treatment with curative intent is only recommended if standardised triggers for  
radical treatment are reached (Table 4). At every follow-up, the patient is categorised as  
having no distant metastasis, suspected distant metastasis (according to PSA-level and/or  
symptoms) or verified distant metastasis (imaging or histopathology/cytology).

Table 3 – triggers for re-

biopsies

**ARM I**

**According to current practice  
(the urologists' judgement)**

**ARM 2**

- I. PSA density >0.2 ng/ml/cc (systematic biopsies)**
- II. MRI progression in men with ISUP grade 1 cancer (targeted biopsies)**
  - ≥5 mm or more increase in size in any dimension of a measurable lesion (a measurable lesion is defined as ≥6 mm in longest diameter in any dimension in best depicted MR sequence)
  - Increase in PI-RADS score to 3,4 or 5
  - High suspicion of extra-capsular extension or seminal vesicle invasion (level of suspicion to be 4 or 5 on Likert scale)
  - A new lesion with PI-RADS score 3-5
- III. MRI progression in men with ISUP grade 2 cancer (targeted biopsies)**
  - ≥5 mm or more increase in size in any dimension of a measurable lesion (a measurable lesion is defined as ≥6 mm in longest diameter in any dimension in best depicted MR sequence)
  - A new lesion with PI-RADS 3-5

PSA=Prostate Specific Antigen, PI-RADS=Prostate Imaging Reporting and Data System,

MRI=Magnetic

Resonance Imaging, ISUP = International Society of Urological Pathology



1  
2  
3  
4  
5  
6  
7  
8  
9  
10  
11 **Table 4 – triggers for radical treatment**

| <b>ARM I</b>                                                     | <b>ARM 2</b>                                                                                                                                                                                                                                                                                                                                                                                                                                                                                                                                                                                                                                                                                                                                                                                                                                                                                                                          |
|------------------------------------------------------------------|---------------------------------------------------------------------------------------------------------------------------------------------------------------------------------------------------------------------------------------------------------------------------------------------------------------------------------------------------------------------------------------------------------------------------------------------------------------------------------------------------------------------------------------------------------------------------------------------------------------------------------------------------------------------------------------------------------------------------------------------------------------------------------------------------------------------------------------------------------------------------------------------------------------------------------------|
| <b>According to current practice (the urologist's judgement)</b> | <p data-bbox="598 504 638 537"><b>I.</b></p> <p data-bbox="813 504 1252 582"><b>MRI progression in lesions with confirmed Gleason pattern 4</b></p> <ul data-bbox="861 582 1315 851" style="list-style-type: none"> <li>- Increase in PI-RADS score to 4 or 5</li> <li>- High suspicion of extra-capsular extension or seminal vesicle invasion (level of suspicion to be 4 or 5 on the Likert scale)</li> </ul> <p data-bbox="598 884 638 918"><b>II.</b></p> <p data-bbox="813 884 1157 918"><b>Pathological progression</b></p> <ul data-bbox="861 918 1315 1234" style="list-style-type: none"> <li>- Gleason pattern 5</li> <li>- Primary Gleason pattern 4 in any core with <math>\geq 5</math> mm cancer</li> <li>- ISUP grade 2 in <math>\geq 3</math> cores (or <math>\geq 30\%</math> of cores if <math>&gt; 10</math> systematic cores), or <math>\geq 10</math> mm cancer in one core (systematic or targeted)</li> </ul> |

12  
13  
14  
15  
16  
17  
18  
19  
20  
21  
22  
23  
24  
25  
26  
27  
28  
29  
30  
31  
32  
33  
34  
35  
36  
37 MRI=Magnetic Resonance Imaging, PI-RADS=Prostate Imaging Reporting and Data System

38  
39  
40  
41 Follow-up continues according to the protocol until initiation of treatment with curative  
42 intent, detection of metastasis, switch from active surveillance to watchful waiting or death of  
43 any cause. For men who discontinue active surveillance, the follow-up and management  
44 continue according to standard clinical practice but with annual reporting in the study. In  
45 patients lost to follow-up, endpoints will be assessed through available registers in the  
46 participating countries.  
47  
48  
49  
50  
51  
52  
53

#### 54 *Patient and Public Involvement*

55  
56 Patient experiences and priorities is important knowledge that may influence the definition of  
57 research questions. Patients were however not directly involved in designing this study,  
58  
59  
60

defining outcome measures, the recruitment to and conduct of the study. A summary of results will be available for all participants and will also be presented to patient organisations and the public.

#### *Experience from first two years of inclusion*

The first patient was included in October 2016 at Uppsala University Hospital, Sweden. In 2017, six additional Swedish centres began enrolment and three Norwegian centres started enrolling patients in 2018. Centres in Finland and the UK aim to start including patients later in 2018. Characteristics of the first 275 randomised patients are displayed in Table 5. Patients are stratified based on participating centre and Gleason score.

**Table 5 - baseline characteristics for the first 275 included patients**

|                                      | Current practice | Standardised triggers |
|--------------------------------------|------------------|-----------------------|
| <b>n</b>                             | 139              | 136                   |
| <b>Age (yr, mean (SD))</b>           | 62 (6.2)         | 64 (6.2)              |
| <b>PSA (ng/ml, mean, (SD))</b>       | 5.1 (2.3)        | 5.8 (2.3)             |
| <b>PSA-D (ng/ml/cc, mean (SD))</b>   | 0.11 (0.04)      | 0.12 (0.04)           |
| <b>Clinical tumour stage (n (%))</b> |                  |                       |
| T1c                                  | 109 (78)         | 115 (85)              |
| T2a                                  | 29 (21)          | 21 (15)               |
| unknown                              | 1 (1)            | 0                     |
| <b>Comorbidity (n (%))</b>           |                  |                       |
| ASA 1                                | 94 (68)          | 84 (62)               |
| ASA 2                                | 40 (29)          | 52 (38)               |
| ASA 3                                | 4 (3)            | 0                     |
| unknown                              | 1 (1)            | 0                     |
| <b>Family history of PCa (n (%))</b> |                  |                       |
| Yes                                  | 33 (24)          | 38 (28)               |
| No                                   | 102 (73)         | 95 (70)               |
| Unknown                              | 4 (3)            | 3 (2)                 |
| <b>MRI technique (n (%))</b>         |                  |                       |
| 1.5 Tesla                            | 20 (14)          | 16 (12)               |
| 3 Tesla                              | 118 (85)         | 116 (85)              |
| Unknown                              | 1 (1)            | 4 (3)                 |
| <b>MRI findings (n (%))</b>          |                  |                       |
| PI-RADS 1-2                          | 76 (55)          | 55 (40)               |
| PI-RADS 3-5                          | 63 (45)          | 81 (60)               |

yr = years, SD = standard deviation, PSA = prostate specific antigen, n = sample size, ASA = American Society of Anesthesiologists classification, PCa = prostate cancer, MRI = magnetic resonance imaging, PI-RADS = Prostate Imaging Reporting and Data System

## Ethics and dissemination

The study has ethical approval from Sweden (the Regional Ethical Review Board in Uppsala), Norway (REK Midt - Regional Ethics Committee Central), Finland (Ethics Committee of Surgery, Helsinki University Hospital) and UK (East of England - Essex Research Ethics Committee). The first analysis of primary and secondary end-points will take place one year after all men are included (and then every third year) and be published in peer-reviewed journal.

## Discussion

The increasing use of active surveillance has reduced overtreatment of prostate cancer to some extent, but still a large number of men are overtreated<sup>2</sup>. Clearly, more patients should start on active surveillance, and fewer patients on active surveillance should convert to radical treatment.

Over the last decades there has been a Gleason score/ISUP grade inflation, partly due to the 2005 revision of the Gleason pattern definitions. The revision entailed that many patterns previously designated Gleason pattern 3 are now reported as pattern 4 and that the Gleason score/ISUP grade on needle biopsies always includes the highest Gleason grade, even if it is just a minimal component<sup>28</sup>. Because long-term outcomes of active surveillance and watchful waiting are chiefly based on studies undertaken before the 2005 revision, a substantial proportion of low-risk tumours in those studies would today be classified as intermediate-risk. Despite this, they had excellent survival without treatment. These results and the changes in Gleason grading suggests that also men with favourable intermediate-risk prostate cancer

1  
2  
3 should be offered active surveillance. This is supported by the fact that MRI with targeted  
4 biopsies detects favourable intermediate-risk tumours that standard biopsies do not detect<sup>18,20</sup>.  
5  
6 Hence, if all men with intermediate risk prostate cancer undergo immediate radical treatment,  
7  
8  
9  
10 overtreatment would increase.

11  
12  
13 In PCASTt/SPCG-17, follow-up during active surveillance is based on PSA testing and  
14  
15 repeated MRI, not on repeated systematic biopsies. Prostate biopsies are uncomfortable and  
16  
17 distressful. They cause bleeding, sometimes urinary retention and about six percent  
18  
19 experience febrile infection and one percent develop sepsis<sup>29</sup>. The incidence of serious  
20  
21 infections is rising because of multidrug resistant bacteria<sup>30</sup>. It is therefore desirable to reduce  
22  
23 the number of biopsies during active surveillance. In the experimental arm of PCASTt/SPCG-  
24  
25 17, biopsies are only performed when triggered which will likely reduce the number of  
26  
27 biopsies. MRI with targeted biopsies detect at least as many histopathological intermediate-  
28  
29 risk tumours as standard biopsies in biopsy naïve men<sup>20,21</sup>, suggesting that MRI with targeted  
30  
31 biopsies is viable in a surveillance program.  
32  
33  
34  
35  
36  
37  
38

39 In PCASTt/SPCG-17 pre-specified changes in MRI trigger targeted biopsies to assess  
40  
41 histopathological progression. Since histopathological progression may occur without MRI  
42  
43 changes, the protocol also stipulates systematic biopsies if PSA density increases above pre-  
44  
45 specified limits (Table 3). Radical treatment is triggered by MRI findings suggesting  
46  
47 progression of a known ISUP grade 2 tumour and by biopsies showing more than a defined  
48  
49 upper limit of Gleason pattern 4 or any Gleason pattern 5 (Table 4).  
50  
51  
52  
53

54 The strengths of PCASTt/SPCG-17 includes the randomised design and a trial size that will  
55  
56 allow quantifying clinically relevant endpoints with reasonable statistical precision. A data  
57  
58 monitoring and safety committee will oversee patient safety and the trial's scientific integrity.  
59  
60

1  
2  
3 The safety of the MRI-based follow-up will be regularly evaluated by comparing the outcome  
4 with a matched group of men managed by active surveillance in the Swedish SAMS study,  
5 who are on active surveillance based on systematic transrectal biopsies<sup>31</sup>. During the long-  
6 term follow-up, new methods for monitoring and treatment might be introduced and applied  
7 in our patient cohort, obscuring the interpretation of the results. Furthermore, over time the  
8 triggers for repeated biopsies and treatment in the PCASTt/SPCG-17 trial's standard  
9 treatment arm might become more similar to the management of the men in the experimental  
10 group. Although this will affect the trial's ability to detect any difference between the two  
11 groups, the PCASTt/SPCG-17 experimental arm can still be used to assess the clinical safety  
12 and acceptability of a standardised protocol and provide prospective data on the performance  
13 of MRI as a monitoring tool – both aspects key to patient safety under AS.  
14  
15  
16  
17  
18  
19  
20  
21  
22  
23  
24  
25  
26  
27  
28  
29  
30

### 31 *Conclusion*

32 PCASTt/SPCG-17 is a randomised trial that evaluates the safety of an MRI-based active  
33 surveillance protocol, comparing standardised triggers for repeat biopsies and curative  
34 treatment. If the protocol proves to be as safe as current clinical practice, its implementation  
35 could lead to a reduction of the number of biopsies, reduce overtreatment of prostate cancer  
36 without compromising the outcome of the patients in terms of morbidity and mortality.  
37  
38  
39  
40  
41  
42  
43  
44  
45  
46  
47  
48  
49  
50  
51  
52  
53  
54  
55  
56  
57  
58  
59  
60

1  
2  
3  
4  
5  
6  
7  
8  
9  
10  
11  
12 *Contributors:*

13  
14 All authors (MSA, H-OA, LH, AB-A, KB, HB, OB, DC, LE, HG, EJ, AR, MVH, FJ, CW and  
15 UWNÅ) have made the following contributions to the work: Substantial contributions to the  
16 conception or design of the work; or the acquisition, analysis, or interpretation of data for the  
17 work. Drafting the work or revising it critically for important intellectual content. Final  
18 approval of the version to be published. Agreement to be accountable for all aspects of the  
19 work in ensuring that questions related to the accuracy or integrity of any part of the work are  
20 appropriately investigated and resolved.  
21  
22  
23  
24  
25  
26  
27  
28  
29  
30  
31  
32

33 *Acknowledgement statement:*

34  
35 The authors thank the following contributors to the study; Monica Andersson, Kerstin  
36 Almroth, Ann-Charlotte Borgefeldt, Britt-Inger Dahlin, Christina Danewid, Kristina From,  
37 Chatrine Hasselberg, Pernilla Helgesson, Helene Krook, Christofer Lagerros, Malin Lindell,  
38 Tuomas Mirtti, Annica Nilsson, Madeleine Nilsson, Hanna Nyberg, Merja Rignell, Inger  
39 Johanne Stokkan, Malin Ståhlgren, Øystein Størkersen and the SPCG-17 study group.  
40  
41  
42  
43  
44  
45  
46  
47  
48

49 *Funding:*

50  
51 This study was supported by grants from the Swedish Cancer Society (2016/466 and  
52 2014/1275), the Swedish Research Council (2016–00177 and 2016–01293), the Nordic  
53 Cancer Union and the Percy Falk Foundation to Dr. Bill-Axelsson and the Karolinska Institutet  
54  
55  
56  
57  
58  
59  
60

1  
2  
3 Distinguished Professor Award to Dr. Hans-Olov Adami (2368/10-221). The founding  
4  
5 sources had no influence in the study.  
6  
7  
8  
9  
10  
11  
12  
13

14 *Declaration of interest:*

15  
16  
17 None of the contributing authors have any conflicts of interest.  
18  
19  
20

21 *Data sharing statement:*

22  
23 No additional data.  
24  
25  
26  
27

28  
29 Figure 1 – Basic follow-up. PSA=Prostate Specific Antigen, MRI=Magnetic Resonance Imaging,  
30 TB=Targeted Biopsies, SB=Systematic Biopsies, QoL=Quality of Life  
31  
32  
33  
34  
35  
36  
37  
38  
39  
40  
41  
42  
43  
44  
45  
46  
47  
48  
49  
50  
51  
52  
53  
54  
55  
56  
57  
58  
59  
60

## References

1. Ferlay J SI, Ervik M, Dikshit R, Eser S, Mathers C, Rebelo M, Parkin DM, Forman D, Bray, F. GLOBOCAN 2012 v1.0, Cancer Incidence and Mortality Worldwide: IARC CancerBase No. 11 [Internet]. . Lyon, France: International Agency for Research on Cancer. 2013.
2. Klotz L. Prostate cancer overdiagnosis and overtreatment. *Current opinion in endocrinology, diabetes, and obesity*. 2013;20(3):204-209.
3. Klotz LH. Active surveillance for good risk prostate cancer: rationale, method, and results. *Can J Urol*. 2005;12 Suppl 2:21-24.
4. Bruinsma SM, Bangma CH, Carroll PR, et al. Active surveillance for prostate cancer: a narrative review of clinical guidelines. *Nat Rev Urol*. 2016;13(3):151-167.
5. Simpkin AJ, Tilling K, Martin RM, et al. Systematic Review and Meta-analysis of Factors Determining Change to Radical Treatment in Active Surveillance for Localized Prostate Cancer. *Eur Urol*. 2015;67(6):993-1005.
6. Dall'Era MA, Albertsen PC, Bangma C, et al. Active surveillance for prostate cancer: a systematic review of the literature. *Eur Urol*. 2012;62(6):976-983.
7. Bill-Axelsson A, Holmberg L, Garmo H, et al. Radical prostatectomy or watchful waiting in early prostate cancer. *The New England journal of medicine*. 2014;370(10):932-942.
8. Wilt TJ, Jones KM, Barry MJ, et al. Follow-up of Prostatectomy versus Observation for Early Prostate Cancer. *The New England journal of medicine*. 2017;377(2):132-142.
9. Hamdy FC, Donovan JL, Lane JA, et al. 10-Year Outcomes after Monitoring, Surgery, or Radiotherapy for Localized Prostate Cancer. *The New England journal of medicine*. 2016;375(15):1415-1424.
10. Naji L, Randhawa H, Sohani Z, et al. Digital Rectal Examination for Prostate Cancer Screening in Primary Care: A Systematic Review and Meta-Analysis. *Annals of family medicine*. 2018;16(2):149-154.
11. Eastham JA, Riedel E, Scardino PT, et al. Variation of serum prostate-specific antigen levels: an evaluation of year-to-year fluctuations. *Jama*. 2003;289(20):2695-2700.
12. Berney DM, Algaba F, Camparo P, et al. The reasons behind variation in Gleason grading of prostatic biopsies: areas of agreement and misconception among 266 European pathologists. *Histopathology*. 2014;64(3):405-411.
13. Loeb S, Folkvaljon Y, Makarov DV, Bratt O, Bill-Axelsson A, Stattin P. Five-year nationwide follow-up study of active surveillance for prostate cancer. *Eur Urol*. 2015;67(2):233-238.



14. Drost FH, Rannikko A, Valdagni R, et al. Can active surveillance really reduce the harms of overdiagnosing prostate cancer? A reflection of real life clinical practice in the PRIAS study. *Translational andrology and urology*. 2018;7(1):98-105.
15. Futterer JJ, Briganti A, De Visschere P, et al. Can Clinically Significant Prostate Cancer Be Detected with Multiparametric Magnetic Resonance Imaging? A Systematic Review of the Literature. *Eur Urol*. 2015;68(6):1045-1053.
16. Weinreb JC, Barentsz JO, Choyke PL, et al. PI-RADS Prostate Imaging - Reporting and Data System: 2015, Version 2. *Eur Urol*. 2016;69(1):16-40.
17. Scarpato KR, Barocas DA. Use of mpMRI in active surveillance for localized prostate cancer. *Urol Oncol*. 2016;34(7):320-325.
18. Ahmed HU, El-Shater Bosaily A, Brown LC, et al. Diagnostic accuracy of multi-parametric MRI and TRUS biopsy in prostate cancer (PROMIS): a paired validating confirmatory study. *Lancet (London, England)*. 2017;389(10071):815-822.
19. Distler FA, Radtke JP, Bonekamp D, et al. The Value of PSA Density in Combination with PI-RADS for the Accuracy of Prostate Cancer Prediction. *J Urol*. 2017;198(3):575-582.
20. Kasivisvanathan V, Rannikko AS, Borghi M, et al. MRI-Targeted or Standard Biopsy for Prostate-Cancer Diagnosis. *The New England journal of medicine*. 2018.
21. Frye TP, George AK, Kilchevsky A, et al. Magnetic Resonance Imaging-Transrectal Ultrasound Guided Fusion Biopsy to Detect Progression in Patients with Existing Lesions on Active Surveillance for Low and Intermediate Risk Prostate Cancer. *J Urol*. 2017;197(3 Pt 1):640-646.
22. Klotz L, Loblaw A, Sugar L, et al. Active Surveillance Magnetic Resonance Imaging Study (ASIST): Results of a Randomized Multicenter Prospective Trial. *Eur Urol*. 2018.
23. Klotz L. Active Surveillance for Intermediate Risk Prostate Cancer. *Curr Urol Rep*. 2017;18(10):80.
24. Klotz L, Vesprini D, Sethukavalan P, et al. Long-term follow-up of a large active surveillance cohort of patients with prostate cancer. *Journal of clinical oncology : official journal of the American Society of Clinical Oncology*. 2015;33(3):272-277.
25. Musunuru HB, Yamamoto T, Klotz L, et al. Active Surveillance for Intermediate Risk Prostate Cancer: Survival Outcomes in the Sunnybrook Experience. *J Urol*. 2016;196(6):1651-1658.
26. Cornford P, Bellmunt J, Bolla M, et al. EAU-ESTRO-SIOG Guidelines on Prostate Cancer. Part II: Treatment of Relapsing, Metastatic, and Castration-Resistant Prostate Cancer. *Eur Urol*. 2017;71(4):630-642.
27. Szymanski KM, Wei JT, Dunn RL, Sanda MG. Development and validation of an abbreviated version of the expanded prostate cancer index composite instrument for measuring health-related quality of life among prostate cancer survivors. *Urology*. 2010;76(5):1245-1250.
28. Danneman D, Drevin L, Robinson D, Stattin P, Egevad L. Gleason inflation 1998-2011: a registry study of 97,168 men. *BJU international*. 2015;115(2):248-255.
29. Lundstrom KJ, Drevin L, Carlsson S, et al. Nationwide population based study of infections after transrectal ultrasound guided prostate biopsy. *J Urol*. 2014;192(4):1116-1122.
30. Zowawi HM, Harris PN, Roberts MJ, et al. The emerging threat of multidrug-resistant Gram-negative bacteria in urology. *Nat Rev Urol*. 2015;12(10):570-584.

- 1  
2  
3 31. Bratt O, Carlsson S, Holmberg E, et al. The Study of Active Monitoring in Sweden  
4 (SAMS): a randomized study comparing two different follow-up schedules for active  
5 surveillance of low-risk prostate cancer. *Scand J Urol*. 2013;47(5):347-355.  
6  
7  
8  
9  
10  
11  
12  
13  
14  
15  
16  
17  
18  
19  
20  
21  
22  
23  
24  
25  
26  
27  
28  
29  
30  
31  
32  
33  
34  
35  
36  
37  
38  
39  
40  
41  
42  
43  
44  
45  
46  
47  
48  
49  
50  
51  
52  
53  
54  
55  
56  
57  
58  
59  
60

For peer review only

1  
2  
3  
4  
5  
6  
7  
8  
9  
10  
11  
12  
13  
14  
15  
16  
17  
18  
19  
20  
21  
22  
23  
24  
25  
26  
27  
28  
29  
30  
31  
32  
33  
34  
35  
36  
37  
38  
39  
40  
41  
42  
43  
44  
45  
46  
47  
48  
49  
50  
51  
52  
53  
54  
55  
56  
57  
58  
59  
60

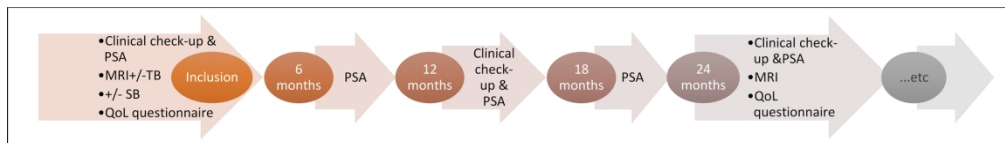

Figure 1 – Basic follow-up. PSA=Prostate Specific Antigen, MRI=Magnetic Resonance Imaging, TB=Targeted Biopsies, SB=Systematic Biopsies, QoL=Quality of Life

89x12mm (600 x 600 DPI)

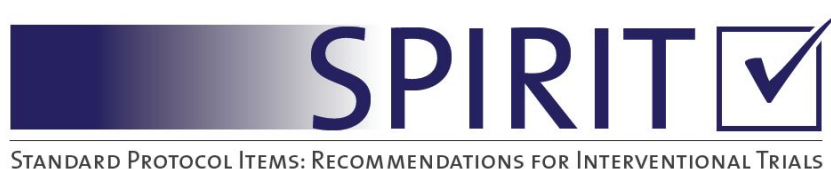

SPIRIT 2013 Checklist: Recommended items to address in a clinical trial protocol and related documents\*

| Section/item                      | Item No | Description                                                                                                                                                                                                                                                                              | Addressed on Page number           |
|-----------------------------------|---------|------------------------------------------------------------------------------------------------------------------------------------------------------------------------------------------------------------------------------------------------------------------------------------------|------------------------------------|
| <b>Administrative information</b> |         |                                                                                                                                                                                                                                                                                          |                                    |
| Title                             | 1       | Descriptive title identifying the study design, population, interventions, and, if applicable, trial acronym                                                                                                                                                                             | 1                                  |
| Trial registration                | 2a      | Trial identifier and registry name. If not yet registered, name of intended registry                                                                                                                                                                                                     | 3                                  |
|                                   | 2b      | All items from the World Health Organization Trial Registration Data Set                                                                                                                                                                                                                 | Yes<br>ClinicalTrials.gov          |
| Protocol version                  | 3       | Date and version identifier                                                                                                                                                                                                                                                              | Available at<br>ClinicalTrials.gov |
| Funding                           | 4       | Sources and types of financial, material, and other support                                                                                                                                                                                                                              | 4                                  |
| Roles and responsibilities        | 5a      | Names, affiliations, and roles of protocol contributors                                                                                                                                                                                                                                  | 1 & 19                             |
|                                   | 5b      | Name and contact information for the trial sponsor                                                                                                                                                                                                                                       | 1                                  |
|                                   | 5c      | Role of study sponsor and funders, if any, in study design; collection, management, analysis, and interpretation of data; writing of the report; and the decision to submit the report for publication, including whether they will have ultimate authority over any of these activities | 1 & 19, 20                         |
|                                   | 5d      | Composition, roles, and responsibilities of the coordinating centre, steering committee, endpoint adjudication committee, data management team, and other individuals or groups overseeing the trial, if applicable (see Item 21a for data monitoring committee)                         | 1, 19, 20<br>& ClinicalTrials.gov  |
| <b>Introduction</b>               |         |                                                                                                                                                                                                                                                                                          |                                    |
| Background and rationale          | 6a      | Description of research question and justification for undertaking the trial, including summary of relevant studies (published and unpublished) examining benefits and harms for each intervention                                                                                       | 5 - 9                              |
|                                   | 6b      | Explanation for choice of comparators                                                                                                                                                                                                                                                    | 9                                  |

|    |                                                           |     |                                                                                                                                                                                                                                                                                                                                                                                |                                      |
|----|-----------------------------------------------------------|-----|--------------------------------------------------------------------------------------------------------------------------------------------------------------------------------------------------------------------------------------------------------------------------------------------------------------------------------------------------------------------------------|--------------------------------------|
| 1  |                                                           |     |                                                                                                                                                                                                                                                                                                                                                                                |                                      |
| 2  | Objectives                                                | 7   | Specific objectives or hypotheses                                                                                                                                                                                                                                                                                                                                              | 9                                    |
| 3  |                                                           |     |                                                                                                                                                                                                                                                                                                                                                                                |                                      |
| 4  | Trial design                                              | 8   | Description of trial design including type of trial (eg, parallel group, crossover, factorial, single group), allocation ratio, and framework (eg, superiority, equivalence, noninferiority, exploratory)                                                                                                                                                                      | 9                                    |
| 5  |                                                           |     |                                                                                                                                                                                                                                                                                                                                                                                |                                      |
| 6  |                                                           |     |                                                                                                                                                                                                                                                                                                                                                                                |                                      |
| 7  |                                                           |     |                                                                                                                                                                                                                                                                                                                                                                                |                                      |
| 8  |                                                           |     |                                                                                                                                                                                                                                                                                                                                                                                |                                      |
| 9  |                                                           |     |                                                                                                                                                                                                                                                                                                                                                                                |                                      |
| 10 | <b>Methods: Participants, interventions, and outcomes</b> |     |                                                                                                                                                                                                                                                                                                                                                                                |                                      |
| 11 |                                                           |     |                                                                                                                                                                                                                                                                                                                                                                                |                                      |
| 12 | Study setting                                             | 9   | Description of study settings (eg, community clinic, academic hospital) and list of countries where data will be collected. Reference to where list of study sites can be obtained                                                                                                                                                                                             | 10, 11                               |
| 13 |                                                           |     |                                                                                                                                                                                                                                                                                                                                                                                |                                      |
| 14 |                                                           |     |                                                                                                                                                                                                                                                                                                                                                                                |                                      |
| 15 |                                                           |     |                                                                                                                                                                                                                                                                                                                                                                                |                                      |
| 16 |                                                           |     |                                                                                                                                                                                                                                                                                                                                                                                |                                      |
| 17 | Eligibility criteria                                      | 10  | Inclusion and exclusion criteria for participants. If applicable, eligibility criteria for study centres and individuals who will perform the interventions (eg, surgeons, psychotherapists)                                                                                                                                                                                   | 10, 11, Table 1 & 2                  |
| 18 |                                                           |     |                                                                                                                                                                                                                                                                                                                                                                                |                                      |
| 19 |                                                           |     |                                                                                                                                                                                                                                                                                                                                                                                |                                      |
| 20 |                                                           |     |                                                                                                                                                                                                                                                                                                                                                                                |                                      |
| 21 |                                                           |     |                                                                                                                                                                                                                                                                                                                                                                                |                                      |
| 22 |                                                           |     |                                                                                                                                                                                                                                                                                                                                                                                |                                      |
| 23 | Interventions                                             | 11a | Interventions for each group with sufficient detail to allow replication, including how and when they will be administered                                                                                                                                                                                                                                                     | 10, 12, 13, 14, figure 1 table 3 & 4 |
| 24 |                                                           |     |                                                                                                                                                                                                                                                                                                                                                                                |                                      |
| 25 |                                                           |     |                                                                                                                                                                                                                                                                                                                                                                                |                                      |
| 26 |                                                           |     |                                                                                                                                                                                                                                                                                                                                                                                |                                      |
| 27 |                                                           |     |                                                                                                                                                                                                                                                                                                                                                                                |                                      |
| 28 |                                                           | 11b | Criteria for discontinuing or modifying allocated interventions for a given trial participant (eg, drug dose change in response to harms, participant request, or improving/worsening disease)                                                                                                                                                                                 | 14                                   |
| 29 |                                                           |     |                                                                                                                                                                                                                                                                                                                                                                                |                                      |
| 30 |                                                           |     |                                                                                                                                                                                                                                                                                                                                                                                |                                      |
| 31 |                                                           |     |                                                                                                                                                                                                                                                                                                                                                                                |                                      |
| 32 |                                                           |     |                                                                                                                                                                                                                                                                                                                                                                                |                                      |
| 33 |                                                           | 11c | Strategies to improve adherence to intervention protocols, and any procedures for monitoring adherence (eg, drug tablet return, laboratory tests)                                                                                                                                                                                                                              | n/a                                  |
| 34 |                                                           |     |                                                                                                                                                                                                                                                                                                                                                                                |                                      |
| 35 |                                                           |     |                                                                                                                                                                                                                                                                                                                                                                                |                                      |
| 36 |                                                           |     |                                                                                                                                                                                                                                                                                                                                                                                |                                      |
| 37 |                                                           |     |                                                                                                                                                                                                                                                                                                                                                                                |                                      |
| 38 |                                                           | 11d | Relevant concomitant care and interventions that are permitted or prohibited during the trial                                                                                                                                                                                                                                                                                  | n/a                                  |
| 39 |                                                           |     |                                                                                                                                                                                                                                                                                                                                                                                |                                      |
| 40 |                                                           |     |                                                                                                                                                                                                                                                                                                                                                                                |                                      |
| 41 | Outcomes                                                  | 12  | Primary, secondary, and other outcomes, including the specific measurement variable (eg, systolic blood pressure), analysis metric (eg, change from baseline, final value, time to event), method of aggregation (eg, median, proportion), and time point for each outcome. Explanation of the clinical relevance of chosen efficacy and harm outcomes is strongly recommended | 10                                   |
| 42 |                                                           |     |                                                                                                                                                                                                                                                                                                                                                                                |                                      |
| 43 |                                                           |     |                                                                                                                                                                                                                                                                                                                                                                                |                                      |
| 44 |                                                           |     |                                                                                                                                                                                                                                                                                                                                                                                |                                      |
| 45 |                                                           |     |                                                                                                                                                                                                                                                                                                                                                                                |                                      |
| 46 |                                                           |     |                                                                                                                                                                                                                                                                                                                                                                                |                                      |
| 47 |                                                           |     |                                                                                                                                                                                                                                                                                                                                                                                |                                      |
| 48 |                                                           |     |                                                                                                                                                                                                                                                                                                                                                                                |                                      |
| 49 |                                                           |     |                                                                                                                                                                                                                                                                                                                                                                                |                                      |
| 50 | Participant timeline                                      | 13  | Time schedule of enrolment, interventions (including any run-ins and washouts), assessments, and visits for participants. A schematic diagram is highly recommended (see Figure)                                                                                                                                                                                               | 12, figure 1                         |
| 51 |                                                           |     |                                                                                                                                                                                                                                                                                                                                                                                |                                      |
| 52 |                                                           |     |                                                                                                                                                                                                                                                                                                                                                                                |                                      |
| 53 |                                                           |     |                                                                                                                                                                                                                                                                                                                                                                                |                                      |
| 54 |                                                           |     |                                                                                                                                                                                                                                                                                                                                                                                |                                      |
| 55 |                                                           |     |                                                                                                                                                                                                                                                                                                                                                                                |                                      |
| 56 |                                                           |     |                                                                                                                                                                                                                                                                                                                                                                                |                                      |
| 57 |                                                           |     |                                                                                                                                                                                                                                                                                                                                                                                |                                      |
| 58 |                                                           |     |                                                                                                                                                                                                                                                                                                                                                                                |                                      |
| 59 |                                                           |     |                                                                                                                                                                                                                                                                                                                                                                                |                                      |
| 60 |                                                           |     |                                                                                                                                                                                                                                                                                                                                                                                |                                      |

|   |             |    |                                                         |     |
|---|-------------|----|---------------------------------------------------------|-----|
| 1 |             |    |                                                         |     |
| 2 | Sample size | 14 | Estimated number of participants needed to achieve      | 12  |
| 3 |             |    | study objectives and how it was determined, including   |     |
| 4 |             |    | clinical and statistical assumptions supporting any     |     |
| 5 |             |    | sample size calculations                                |     |
| 6 |             |    |                                                         |     |
| 7 | Recruitment | 15 | Strategies for achieving adequate participant enrolment | n/a |
| 8 |             |    | to reach target sample size                             |     |
| 9 |             |    |                                                         |     |

### Methods: Assignment of interventions (for controlled trials)

#### Allocation:

|    |                |     |                                                            |                    |
|----|----------------|-----|------------------------------------------------------------|--------------------|
| 14 | Sequence       | 16a | Method of generating the allocation sequence (eg,          | In protocol        |
| 15 | generation     |     | computer-generated random numbers), and list of any        | Available at       |
| 16 |                |     | factors for stratification. To reduce predictability of a  | ClinicalTrials.gov |
| 17 |                |     | random sequence, details of any planned restriction (eg,   |                    |
| 18 |                |     | blocking) should be provided in a separate document that   |                    |
| 19 |                |     | is unavailable to those who enrol participants or assign   |                    |
| 20 |                |     | interventions                                              |                    |
| 21 |                |     |                                                            |                    |
| 22 |                |     |                                                            |                    |
| 23 |                |     |                                                            |                    |
| 24 | Allocation     | 16b | Mechanism of implementing the allocation sequence (eg,     | In protocol        |
| 25 | concealment    |     | central telephone; sequentially numbered, opaque,          | Available at       |
| 26 | mechanism      |     | sealed envelopes), describing any steps to conceal the     | ClinicalTrials.gov |
| 27 |                |     | sequence until interventions are assigned                  |                    |
| 28 |                |     |                                                            |                    |
| 29 |                |     |                                                            |                    |
| 30 | Implementation | 16c | Who will generate the allocation sequence, who will enrol  | In protocol        |
| 31 |                |     | participants, and who will assign participants to          | Available at       |
| 32 |                |     | interventions                                              | ClinicalTrials.gov |
| 33 |                |     |                                                            |                    |
| 34 | Blinding       | 17a | Who will be blinded after assignment to interventions (eg, | In protocol        |
| 35 | (masking)      |     | trial participants, care providers, outcome assessors,     | Available at       |
| 36 |                |     | data analysts), and how                                    | ClinicalTrials.gov |
| 37 |                |     |                                                            |                    |
| 38 |                |     |                                                            |                    |
| 39 |                | 17b | If blinded, circumstances under which unblinding is        | n/a                |
| 40 |                |     | permissible, and procedure for revealing a participant's   |                    |
| 41 |                |     | allocated intervention during the trial                    |                    |
| 42 |                |     |                                                            |                    |

### Methods: Data collection, management, and analysis

|    |                 |     |                                                             |        |
|----|-----------------|-----|-------------------------------------------------------------|--------|
| 45 | Data collection | 18a | Plans for assessment and collection of outcome,             | 12, 13 |
| 46 | methods         |     | baseline, and other trial data, including any related       |        |
| 47 |                 |     | processes to promote data quality (eg, duplicate            |        |
| 48 |                 |     | measurements, training of assessors) and a description      |        |
| 49 |                 |     | of study instruments (eg, questionnaires, laboratory        |        |
| 50 |                 |     | tests) along with their reliability and validity, if known. |        |
| 51 |                 |     | Reference to where data collection forms can be found, if   |        |
| 52 |                 |     | not in the protocol                                         |        |
| 53 |                 |     |                                                             |        |
| 54 |                 |     |                                                             |        |
| 55 |                 |     |                                                             |        |
| 56 |                 | 18b | Plans to promote participant retention and complete         | 13     |
| 57 |                 |     | follow-up, including list of any outcome data to be         |        |
| 58 |                 |     | collected for participants who discontinue or deviate from  |        |
| 59 |                 |     | intervention protocols                                      |        |
| 60 |                 |     |                                                             |        |

|    |                                 |     |                                                             |                    |
|----|---------------------------------|-----|-------------------------------------------------------------|--------------------|
| 1  |                                 |     |                                                             |                    |
| 2  | Data                            | 19  | Plans for data entry, coding, security, and storage,        | In protocol        |
| 3  | management                      |     | including any related processes to promote data quality     | Available at       |
| 4  |                                 |     | (eg, double data entry; range checks for data values).      | ClinicalTrials.gov |
| 5  |                                 |     | Reference to where details of data management               |                    |
| 6  |                                 |     | procedures can be found, if not in the protocol             |                    |
| 7  |                                 |     |                                                             |                    |
| 8  |                                 |     |                                                             |                    |
| 9  | Statistical                     | 20a | Statistical methods for analysing primary and secondary     | In protocol        |
| 10 | methods                         |     | outcomes. Reference to where other details of the           | Available at       |
| 11 |                                 |     | statistical analysis plan can be found, if not in the       | ClinicalTrials.gov |
| 12 |                                 |     | protocol                                                    |                    |
| 13 |                                 |     |                                                             |                    |
| 14 |                                 | 20b | Methods for any additional analyses (eg, subgroup and       | In protocol        |
| 15 |                                 |     | adjusted analyses)                                          | Available at       |
| 16 |                                 |     |                                                             | ClinicalTrials.gov |
| 17 |                                 |     |                                                             |                    |
| 18 |                                 |     |                                                             |                    |
| 19 |                                 | 20c | Definition of analysis population relating to protocol non- | In protocol        |
| 20 |                                 |     | adherence (eg, as randomised analysis), and any             | Available at       |
| 21 |                                 |     | statistical methods to handle missing data (eg, multiple    | ClinicalTrials.gov |
| 22 |                                 |     | imputation)                                                 |                    |
| 23 |                                 |     |                                                             |                    |
| 24 |                                 |     |                                                             |                    |
| 25 | <b>Methods: Monitoring</b>      |     |                                                             |                    |
| 26 | Data monitoring                 | 21a | Composition of data monitoring committee (DMC);             | In protocol        |
| 27 |                                 |     | summary of its role and reporting structure; statement of   | Available at       |
| 28 |                                 |     | whether it is independent from the sponsor and              | ClinicalTrials.gov |
| 29 |                                 |     | competing interests; and reference to where further         |                    |
| 30 |                                 |     | details about its charter can be found, if not in the       |                    |
| 31 |                                 |     | protocol. Alternatively, an explanation of why a DMC is     |                    |
| 32 |                                 |     | not needed                                                  |                    |
| 33 |                                 |     |                                                             |                    |
| 34 |                                 |     |                                                             |                    |
| 35 |                                 |     |                                                             |                    |
| 36 |                                 | 21b | Description of any interim analyses and stopping            | In protocol        |
| 37 |                                 |     | guidelines, including who will have access to these         | Available at       |
| 38 |                                 |     | interim results and make the final decision to terminate    | ClinicalTrials.gov |
| 39 |                                 |     | the trial                                                   |                    |
| 40 |                                 |     |                                                             |                    |
| 41 |                                 |     |                                                             |                    |
| 42 | Harms                           | 22  | Plans for collecting, assessing, reporting, and managing    | In protocol        |
| 43 |                                 |     | solicited and spontaneously reported adverse events and     | Available at       |
| 44 |                                 |     | other unintended effects of trial interventions or trial    | ClinicalTrials.gov |
| 45 |                                 |     | conduct                                                     |                    |
| 46 |                                 |     |                                                             |                    |
| 47 | Auditing                        | 23  | Frequency and procedures for auditing trial conduct, if     | n/a                |
| 48 |                                 |     | any, and whether the process will be independent from       |                    |
| 49 |                                 |     | investigators and the sponsor                               |                    |
| 50 |                                 |     |                                                             |                    |
| 51 |                                 |     |                                                             |                    |
| 52 | <b>Ethics and dissemination</b> |     |                                                             |                    |
| 53 |                                 |     |                                                             |                    |
| 54 | Research ethics                 | 24  | Plans for seeking research ethics committee/institutional   | 2 & 9              |
| 55 | approval                        |     | review board (REC/IRB) approval                             |                    |
| 56 |                                 |     |                                                             |                    |
| 57 |                                 |     |                                                             |                    |
| 58 |                                 |     |                                                             |                    |
| 59 |                                 |     |                                                             |                    |
| 60 |                                 |     |                                                             |                    |

|    |                   |     |                                                                |                    |
|----|-------------------|-----|----------------------------------------------------------------|--------------------|
| 1  |                   |     |                                                                |                    |
| 2  | Protocol          | 25  | Plans for communicating important protocol modifications       | In protocol        |
| 3  | amendments        |     | (eg, changes to eligibility criteria, outcomes, analyses) to   | Available at       |
| 4  |                   |     | relevant parties (eg, investigators, REC/IRBs, trial           | ClinicalTrials.gov |
| 5  |                   |     | participants, trial registries, journals, regulators)          |                    |
| 6  |                   |     |                                                                |                    |
| 7  | Consent or assent | 26a | Who will obtain informed consent or assent from potential      | In protocol        |
| 8  |                   |     | trial participants or authorised surrogates, and how (see      | Available at       |
| 9  |                   |     | Item 32)                                                       | ClinicalTrials.gov |
| 10 |                   |     |                                                                |                    |
| 11 |                   |     |                                                                |                    |
| 12 |                   | 26b | Additional consent provisions for collection and use of        | n/a                |
| 13 |                   |     | participant data and biological specimens in ancillary         |                    |
| 14 |                   |     | studies, if applicable                                         |                    |
| 15 |                   |     |                                                                |                    |
| 16 | Confidentiality   | 27  | How personal information about potential and enrolled          | In protocol        |
| 17 |                   |     | participants will be collected, shared, and maintained in      | Available at       |
| 18 |                   |     | order to protect confidentiality before, during, and after     | ClinicalTrials.gov |
| 19 |                   |     | the trial                                                      |                    |
| 20 |                   |     |                                                                |                    |
| 21 |                   |     |                                                                |                    |
| 22 | Declaration of    | 28  | Financial and other competing interests for principal          | 20                 |
| 23 | interests         |     | investigators for the overall trial and each study site        |                    |
| 24 |                   |     |                                                                |                    |
| 25 | Access to data    | 29  | Statement of who will have access to the final trial           | In protocol        |
| 26 |                   |     | dataset, and disclosure of contractual agreements that         | Available at       |
| 27 |                   |     | limit such access for investigators                            | ClinicalTrials.gov |
| 28 |                   |     |                                                                |                    |
| 29 |                   |     |                                                                |                    |
| 30 | Ancillary and     | 30  | Provisions, if any, for ancillary and post-trial care, and for | n/a                |
| 31 | post-trial care   |     | compensation to those who suffer harm from trial               |                    |
| 32 |                   |     | participation                                                  |                    |
| 33 |                   |     |                                                                |                    |
| 34 | Dissemination     | 31a | Plans for investigators and sponsor to communicate trial       | 3, 15, 16          |
| 35 | policy            |     | results to participants, healthcare professionals, the         |                    |
| 36 |                   |     | public, and other relevant groups (eg, via publication,        |                    |
| 37 |                   |     | reporting in results databases, or other data sharing          |                    |
| 38 |                   |     | arrangements), including any publication restrictions          |                    |
| 39 |                   |     |                                                                |                    |
| 40 |                   |     |                                                                |                    |
| 41 |                   | 31b | Authorship eligibility guidelines and any intended use of      | In protocol        |
| 42 |                   |     | professional writers                                           | Available at       |
| 43 |                   |     |                                                                | ClinicalTrials.gov |
| 44 |                   |     |                                                                |                    |
| 45 |                   |     |                                                                |                    |
| 46 |                   | 31c | Plans, if any, for granting public access to the full          | In protocol        |
| 47 |                   |     | protocol, participant-level dataset, and statistical code      | Available at       |
| 48 |                   |     |                                                                | ClinicalTrials.gov |
| 49 |                   |     |                                                                |                    |
| 50 | <b>Appendices</b> |     |                                                                |                    |
| 51 |                   |     |                                                                |                    |
| 52 | Informed consent  | 32  | Model consent form and other related documentation             | In protocol        |
| 53 | materials         |     | given to participants and authorised surrogates                | Available at       |
| 54 |                   |     |                                                                | ClinicalTrials.gov |
| 55 |                   |     |                                                                |                    |
| 56 |                   |     |                                                                |                    |
| 57 |                   |     |                                                                |                    |
| 58 |                   |     |                                                                |                    |
| 59 |                   |     |                                                                |                    |
| 60 |                   |     |                                                                |                    |



|   |            |    |                                                               |                    |
|---|------------|----|---------------------------------------------------------------|--------------------|
| 1 |            |    |                                                               |                    |
| 2 | Biological | 33 | Plans for collection, laboratory evaluation, and storage of   | In protocol        |
| 3 | specimens  |    | biological specimens for genetic or molecular analysis in     | Available at       |
| 4 |            |    | the current trial and for future use in ancillary studies, if | ClinicalTrials.gov |
| 5 |            |    | applicable                                                    |                    |
| 6 |            |    |                                                               |                    |

7 \*It is strongly recommended that this checklist be read in conjunction with the SPIRIT 2013  
8 Explanation & Elaboration for important clarification on the items. Amendments to the  
9 protocol should be tracked and dated. The SPIRIT checklist is copyrighted by the SPIRIT  
10 Group under the Creative Commons "[Attribution-NonCommercial-NoDerivs 3.0 Unported](#)"  
11 license.  
12  
13  
14  
15  
16  
17  
18  
19  
20  
21  
22  
23  
24  
25  
26  
27  
28  
29  
30  
31  
32  
33  
34  
35  
36  
37  
38  
39  
40  
41  
42  
43  
44  
45  
46  
47  
48  
49  
50  
51  
52  
53  
54  
55  
56  
57  
58  
59  
60

For peer review only
