# Supplementary material for: PCASTt/SPCG-17—a randomised trial of active surveillance in prostate cancer: rationale and design
Source: PubMed Central journal article supplement — BMJ Open. 2019 Aug 22;9(8):e027860. doi: 10.1136/bmjopen-2018-027860 (PMC6707666; doi:10.1136/bmjopen-2018-027860), 2019-08-22
Supplement: bmjopen-2018-027860.reviewer_comments.pdf [file bmjopen-2018-027860.reviewer_comments.pdf]

## PEER REVIEW HISTORY

BMJ Open publishes all reviews undertaken for accepted manuscripts. Reviewers are asked to complete a checklist review form (<http://bmjopen.bmj.com/site/about/resources/checklist.pdf>) and are provided with free text boxes to elaborate on their assessment. These free text comments are reproduced below.

### ARTICLE DETAILS

|                            |                                                                                                                                                                                                                                                                                |
|----------------------------|--------------------------------------------------------------------------------------------------------------------------------------------------------------------------------------------------------------------------------------------------------------------------------|
| <b>TITLE (PROVISIONAL)</b> | PCASTt/SPCG-17 – A randomised trial of active surveillance in prostate cancer: rationale and design                                                                                                                                                                            |
| <b>AUTHORS</b>             | Ahlberg, Mats; Adami, Hans-Olov; Beckmann, Kerri; Bertilsson, Helena; Bratt, Ola; Cahill, Declan; Egevad, Lars; Garmo, Hans; Holmberg, Lars; Johansson, Eva; Rannikko, Antti; Van Hemelrijck, Mieke; Jäderling, Fredrik; Wassberg, Cecilia; Åberg, Ulrika; Bill-Axelsson, Anna |

### VERSION 1 – REVIEW

|                        |                                                 |
|------------------------|-------------------------------------------------|
| <b>REVIEWER</b>        | Jeremy Millar<br>Monash University<br>Australia |
| <b>REVIEW RETURNED</b> | 22-Dec-2018                                     |

|                         |                                                                                                                                                                                                                                                                                                                                                                                                                                       |
|-------------------------|---------------------------------------------------------------------------------------------------------------------------------------------------------------------------------------------------------------------------------------------------------------------------------------------------------------------------------------------------------------------------------------------------------------------------------------|
| <b>GENERAL COMMENTS</b> | The definitions of progression-free survival are not standard and thus may impede comparison with other studies. Specifically the more commonly used definition of progression after surgery is the AUA definition of 0.2 or more and a confirmatory test. Similarly the most common definition after RT is the Phoenix, which is an increase of more than 2 above the nadir. This is different from the definitions in the protocol. |
|-------------------------|---------------------------------------------------------------------------------------------------------------------------------------------------------------------------------------------------------------------------------------------------------------------------------------------------------------------------------------------------------------------------------------------------------------------------------------|

|                        |                               |
|------------------------|-------------------------------|
| <b>REVIEWER</b>        | Leonard Marks<br>UCLA, U.S.A. |
| <b>REVIEW RETURNED</b> | 28-Jan-2019                   |

|                         |                                                                                  |
|-------------------------|----------------------------------------------------------------------------------|
| <b>GENERAL COMMENTS</b> | This should be a definitive study, providing clear answers to the key questions. |
|-------------------------|----------------------------------------------------------------------------------|

## VERSION 1 – AUTHOR RESPONSE

Reviewer: 1

Reviewer Name: Jeremy Millar

Institution and Country: Monash University, Australia

Please state any competing interests or state 'None declared': None declared.

The definitions of progression-free survival are not standard and thus may impede comparison with other studies. Specifically the more commonly used definition of progression after surgery is the AUA definition of 0.2 or more and a confirmatory test. Similarly the most common definition after RT is the Phoenix, which is an increase of more than 2 above the nadir. This is different from the definitions in the protocol.

ANSWER: Thank you for this important remark. Our intention has been to utilise commonly used definitions of progression. We have changed to the EAU definitions of biochemical recurrence after radical prostatectomy and to the Phoenix definition of biochemical failure after radiotherapy (page 10, paragraph 1).
